# Supplementary material for: First-in-Class Star-Shaped Triazine Dendrimers Endowed with MMP-9 Inhibition and VEGF Suppression Capacity: Design, Synthesis, and Anticancer Evaluation
Source: PubMed Central journal article supplement — ACS Omega. 2022 Jun 9;7(24):21131–44. doi: 10.1021/acsomega.2c01949 (PMC9219090; doi:10.1021/acsomega.2c01949), 2022-06-09
Supplement: ao2c01949_si_001.pdf [file ao2c01949_si_001.pdf]

## Supporting Information

### First-in-class star-shaped triazine dendrimers endowed with MMP-9 inhibition and VEGF suppression capacity; design, synthesis and anticancer evaluation

Nesreen S. Haiba,<sup>a</sup> Hosam H. Khalil,<sup>b</sup> Ahmed Bergas,<sup>b</sup> Marwa M. Abu-Serie,<sup>c</sup>  
Sherine N. Khattab,<sup>\* b,e</sup> Mohamed Teleb,<sup>d,e</sup>

<sup>a</sup> Department of Physics and Chemistry, Faculty of Education, Alexandria University, Egypt

<sup>b</sup> Chemistry Department, Faculty of Science, Alexandria University, Alexandria 21321, Egypt

<sup>c</sup> Medical Biotechnology Department, Genetic Engineering and Biotechnology Research Institute, City of Scientific Research and Technological Applications (SRTA-City), Egypt

<sup>d</sup> Department of Pharmaceutical Chemistry, Faculty of Pharmacy, Alexandria University, Alexandria, Egypt

<sup>e</sup> Cancer Nanotechnology Research Laboratory (CNRL), Faculty of Pharmacy, Alexandria University, Alexandria, Egypt

#### Table of Content

#### 1. IR and NMR (<sup>1</sup>H and <sup>13</sup>C) Spectra of the synthesized dendrimers and their precursors.

| Figure number | Figure name                                                                              | page      |
|---------------|------------------------------------------------------------------------------------------|-----------|
| <b>S1</b>     | IR (KBr) spectrum of <b>8a</b>                                                           | <b>3</b>  |
| <b>S2</b>     | <sup>1</sup> H-NMR (DMSO- <i>d</i> <sub>6</sub> ) spectrum of <b>8a</b>                  | <b>4</b>  |
| <b>S3</b>     | <sup>13</sup> C-NMR (DMSO- <i>d</i> <sub>6</sub> ) spectrum of <b>8a</b>                 | <b>5</b>  |
| <b>S4</b>     | IR (KBr) spectrum of <b>8b</b>                                                           | <b>6</b>  |
| <b>S5</b>     | <sup>1</sup> H-NMR (DMSO- <i>d</i> <sub>6</sub> ) spectrum of <b>8b</b>                  | <b>7</b>  |
| <b>S6</b>     | <sup>1</sup> H-NMR (DMSO- <i>d</i> <sub>6</sub> .D <sub>2</sub> O) spectrum of <b>8b</b> | <b>8</b>  |
| <b>S7</b>     | <sup>13</sup> C-NMR (DMSO- <i>d</i> <sub>6</sub> ) spectrum of <b>8b</b>                 | <b>9</b>  |
| <b>S8</b>     | IR (KBr) spectrum of <b>8c</b>                                                           | <b>10</b> |
| <b>S9</b>     | <sup>1</sup> H-NMR (DMSO- <i>d</i> <sub>6</sub> ) spectrum of <b>8c</b>                  | <b>11</b> |
| <b>S10</b>    | <sup>1</sup> H-NMR (DMSO- <i>d</i> <sub>6</sub> .D <sub>2</sub> O) spectrum of <b>8c</b> | <b>12</b> |
| <b>S11</b>    | <sup>13</sup> C-NMR (DMSO- <i>d</i> <sub>6</sub> ) spectrum of <b>8c</b>                 | <b>13</b> |
| <b>S12</b>    | IR (KBr) spectrum of <b>10</b>                                                           | <b>14</b> |
| <b>S13</b>    | <sup>1</sup> H-NMR (DMSO- <i>d</i> <sub>6</sub> ) spectrum of <b>10</b>                  | <b>15</b> |
| <b>S14</b>    | <sup>13</sup> C-NMR (DMSO- <i>d</i> <sub>6</sub> ) spectrum of <b>10</b>                 | <b>16</b> |
| <b>S15</b>    | IR (KBr) spectrum of <b>11</b>                                                           | <b>17</b> |
| <b>S16</b>    | <sup>1</sup> H-NMR (DMSO- <i>d</i> <sub>6</sub> ) spectrum of <b>11</b>                  | <b>18</b> |

|            |                                                                                           |           |
|------------|-------------------------------------------------------------------------------------------|-----------|
| <b>S17</b> | <sup>1</sup> H-NMR (DMSO- <i>d</i> <sub>6</sub> .D <sub>2</sub> O) spectrum of <b>11</b>  | <b>19</b> |
| <b>S18</b> | <sup>13</sup> C-NMR (DMSO- <i>d</i> <sub>6</sub> ) spectrum of <b>11</b>                  | <b>20</b> |
| <b>S19</b> | IR (KBr) spectrum of <b>12</b>                                                            | <b>21</b> |
| <b>S20</b> | <sup>1</sup> H-NMR (DMSO- <i>d</i> <sub>6</sub> ) spectrum of <b>12</b>                   | <b>22</b> |
| <b>S21</b> | <sup>13</sup> C-NMR (DMSO- <i>d</i> <sub>6</sub> ) spectrum of <b>12</b>                  | <b>23</b> |
| <b>S22</b> | IR (KBr) spectrum of <b>13</b>                                                            | <b>24</b> |
| <b>S23</b> | <sup>1</sup> H-NMR (DMSO- <i>d</i> <sub>6</sub> ) spectrum of <b>13</b>                   | <b>25</b> |
| <b>S24</b> | <sup>1</sup> H-NMR (DMSO- <i>d</i> <sub>6</sub> .D <sub>2</sub> O) spectrum of <b>13</b>  | <b>26</b> |
| <b>S25</b> | <sup>13</sup> C-NMR (DMSO- <i>d</i> <sub>6</sub> ) spectrum of <b>13</b>                  | <b>27</b> |
| <b>S26</b> | IR (KBr) spectrum of <b>14a</b>                                                           | <b>28</b> |
| <b>S2</b>  | <sup>1</sup> H-NMR (DMSO- <i>d</i> <sub>6</sub> ) spectrum of <b>14a</b>                  | <b>29</b> |
| <b>S28</b> | <sup>1</sup> H-NMR (DMSO- <i>d</i> <sub>6</sub> .D <sub>2</sub> O) spectrum of <b>14a</b> | <b>30</b> |
| <b>S29</b> | <sup>13</sup> C-NMR (DMSO- <i>d</i> <sub>6</sub> ) spectrum of <b>14a</b>                 | <b>31</b> |
| <b>S30</b> | IR (KBr) spectrum of <b>14b</b>                                                           | <b>32</b> |
| <b>S31</b> | <sup>1</sup> H-NMR (DMSO- <i>d</i> <sub>6</sub> ) spectrum of <b>14b</b>                  | <b>33</b> |
| <b>S32</b> | <sup>13</sup> C-NMR (DMSO- <i>d</i> <sub>6</sub> ) spectrum of <b>14b</b>                 | <b>34</b> |
| <b>S33</b> | IR (KBr) spectrum of <b>14c</b>                                                           | <b>35</b> |
| <b>S34</b> | <sup>1</sup> H-NMR (DMSO- <i>d</i> <sub>6</sub> ) spectrum of <b>14c</b>                  | <b>36</b> |
| <b>S35</b> | <sup>13</sup> C-NMR (DMSO- <i>d</i> <sub>6</sub> ) spectrum of <b>14c</b>                 | <b>37</b> |
| <b>S36</b> | IR (KBr) spectrum of <b>14d</b>                                                           | <b>38</b> |
| <b>S37</b> | <sup>1</sup> H-NMR (DMSO- <i>d</i> <sub>6</sub> ) spectrum of <b>14d</b>                  | <b>39</b> |
| <b>S38</b> | <sup>13</sup> C-NMR (DMSO- <i>d</i> <sub>6</sub> ) spectrum of <b>14d</b>                 | <b>40</b> |
| <b>S39</b> | IR (KBr) spectrum of <b>14e</b>                                                           | <b>41</b> |
| <b>S40</b> | <sup>1</sup> H-NMR (DMSO- <i>d</i> <sub>6</sub> ) spectrum of <b>14e</b>                  | <b>42</b> |
| <b>S41</b> | <sup>13</sup> C-NMR (DMSO- <i>d</i> <sub>6</sub> ) spectrum of <b>14e</b>                 | <b>43</b> |

---

## **2. Biological evaluation**

***2.1. Cytotoxicity of the synthesized dendrimers on normal human lung fibroblasts (Wi-38)***

***2.2. Anticancer evaluation of the synthesized dendrimers***

***2.3. In vitro MMPs inhibition of the most active dendrimers***

***2.4. Flow cytometric analysis of apoptotic effects of the most active and safe compounds***

***2.5. Tumor cell migration inhibition***

***2.6. Expression of VEGF, cyclin D and p21***

***2.7. Statistical analysis***

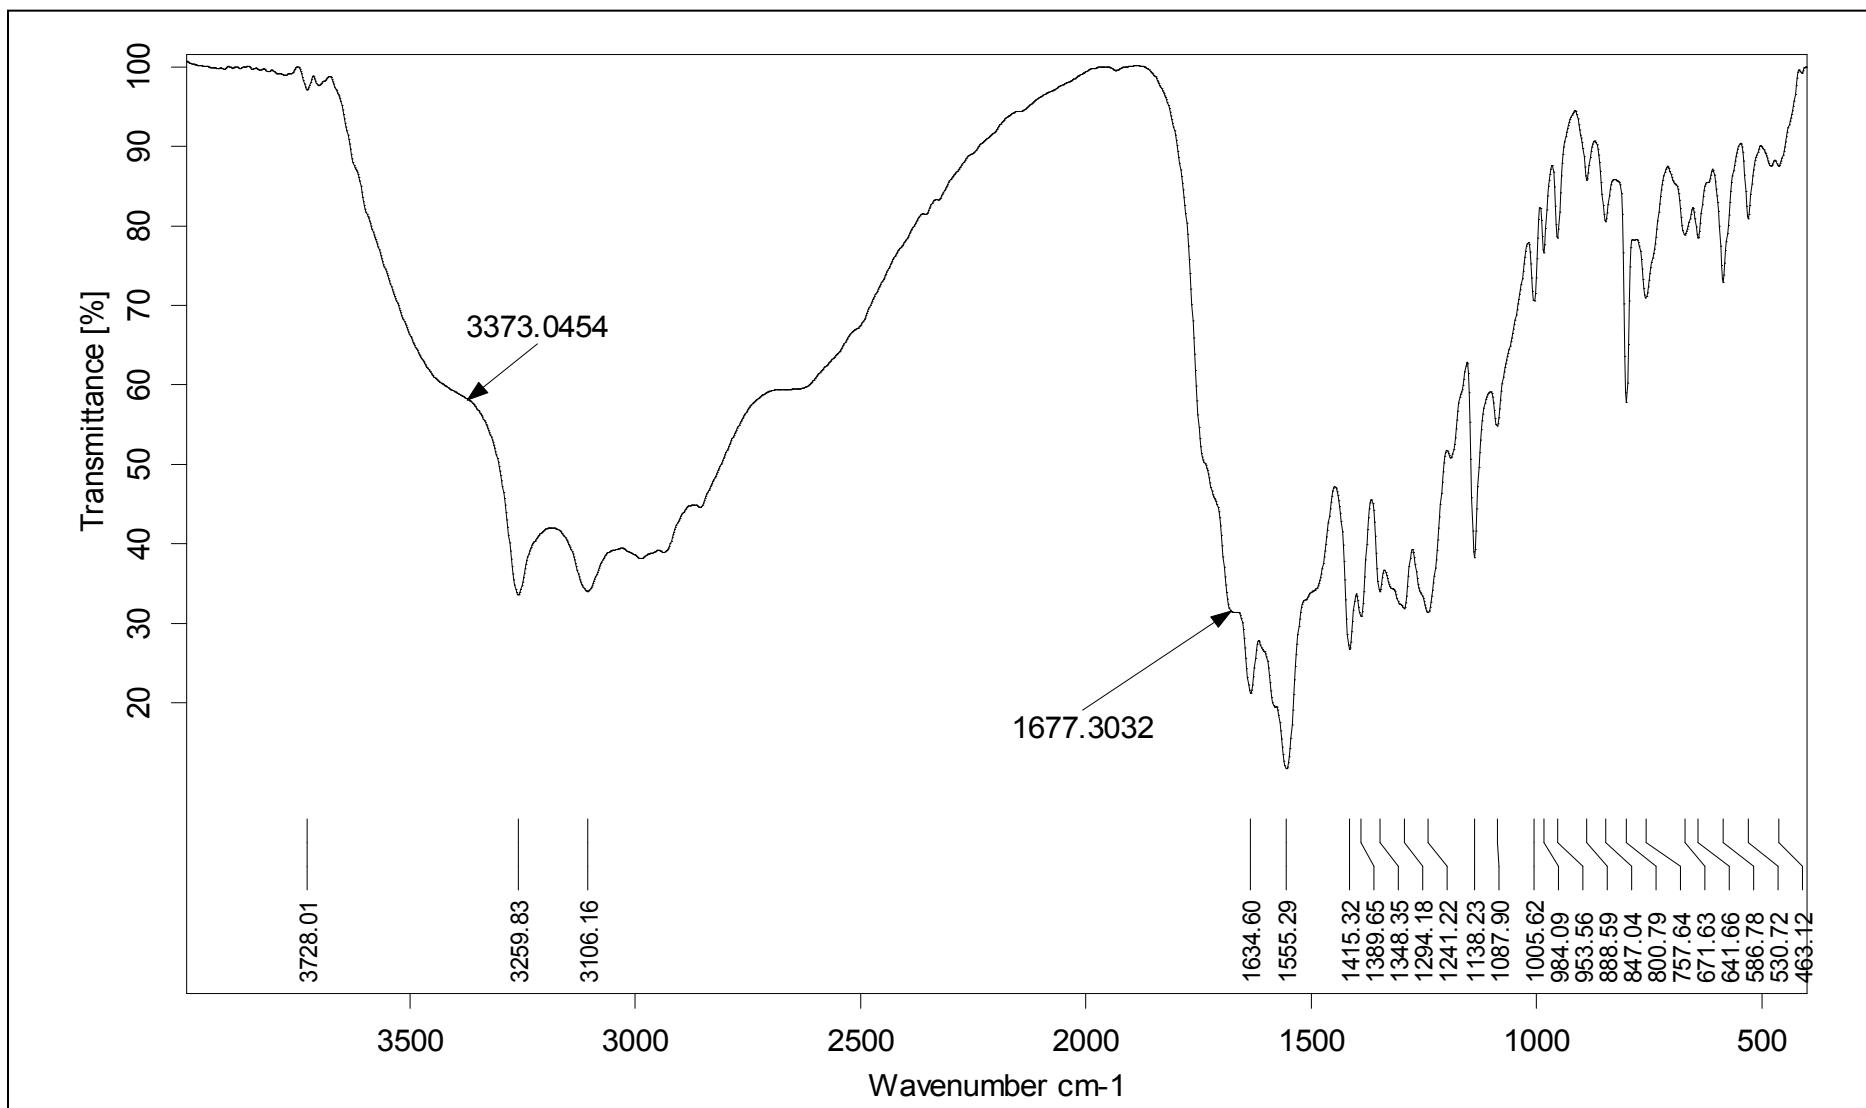

**Figure S1:** IR (KBr) spectrum of 2,2',2'',2''',2''''-(6,6',6''-(2,2',2''-(4,4',4''-(1,3,5-triazine-2,4,6-triyl)tris(azanediyl))tris(benzoyl))tris(hydrazine-2,1-diyl))tris(1,3,5-triazine-6,4,2-triyl))hexakis(azanediyl))hexaacetic acid **8a**.

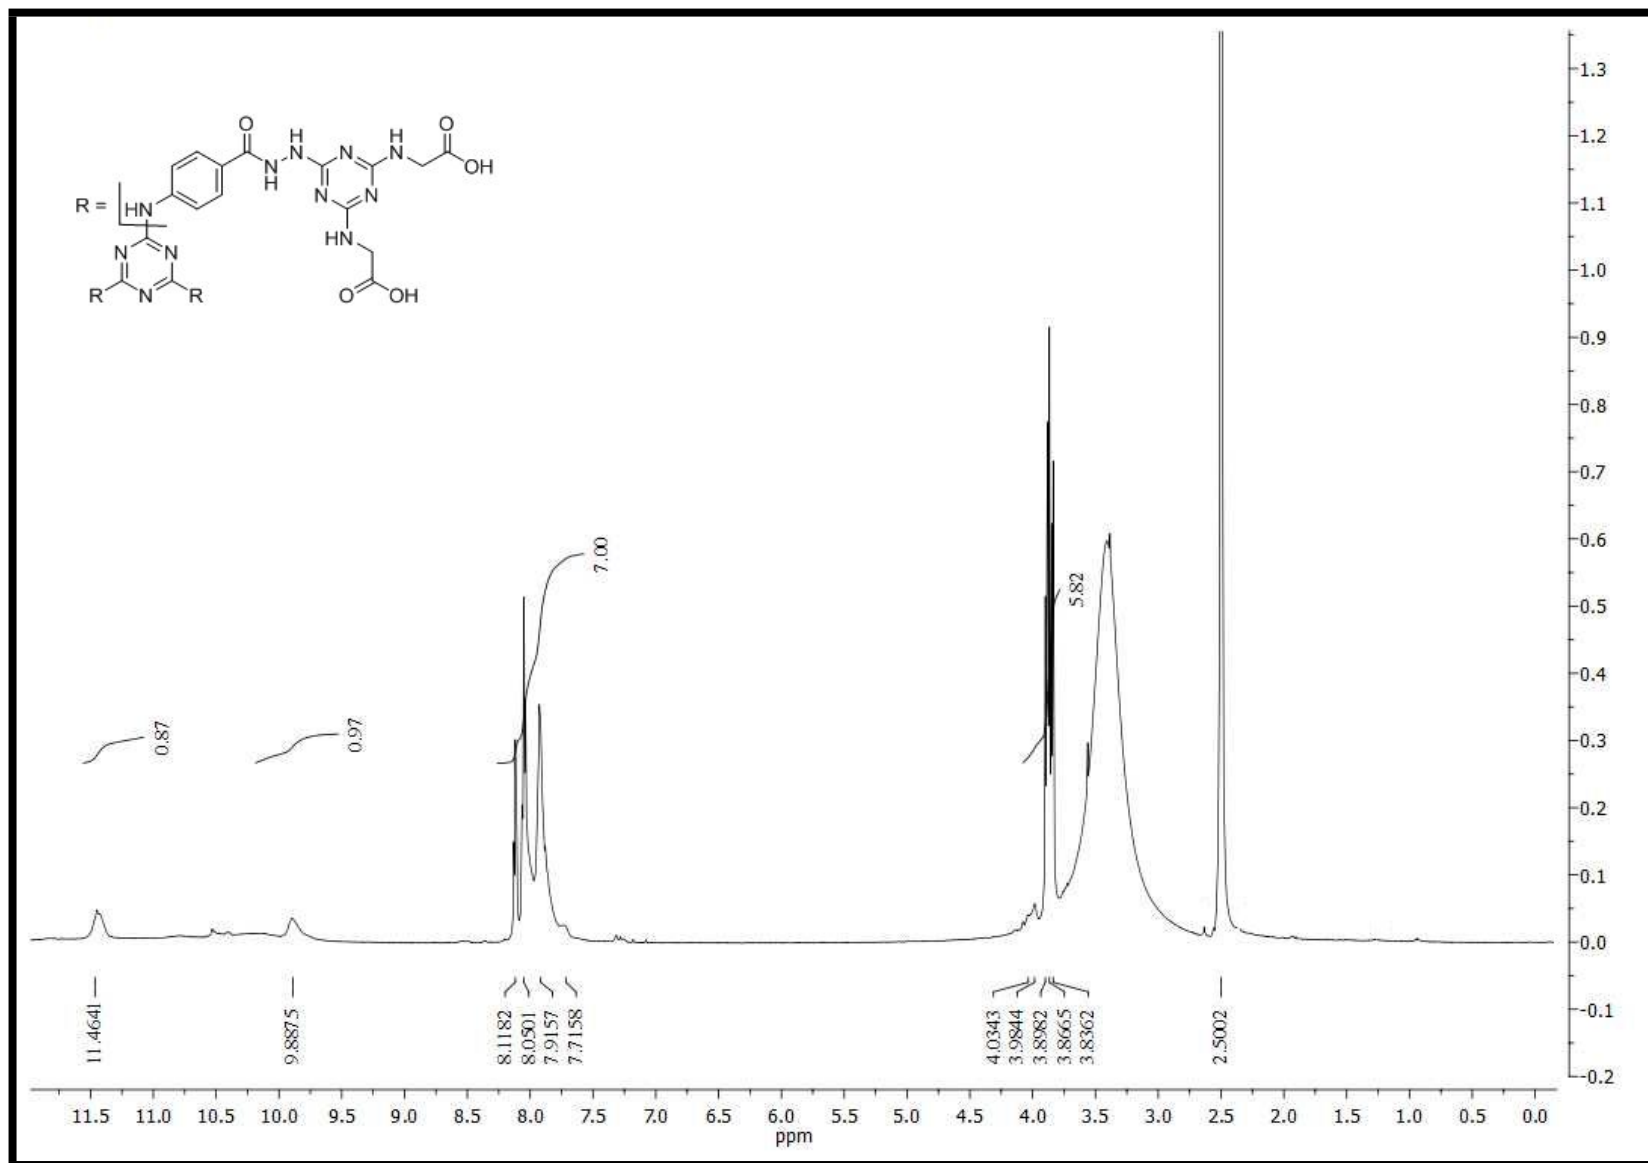

**Figure S2:**  $^1\text{H-NMR}$  ( $\text{DMSO-}d_6$ ) spectrum of 2,2',2'',2''',2''''-((6,6',6''-(2,2',2''-(4,4',4''-((1,3,5-triazine-2,4,6-triyl)tris(azanediyl))tris(benzoyl))tris(hydrazine-2,1-diyl))tris(1,3,5-triazine-6,4,2-triyl))hexakis(azanediyl))hexaacetic acid **8a**.

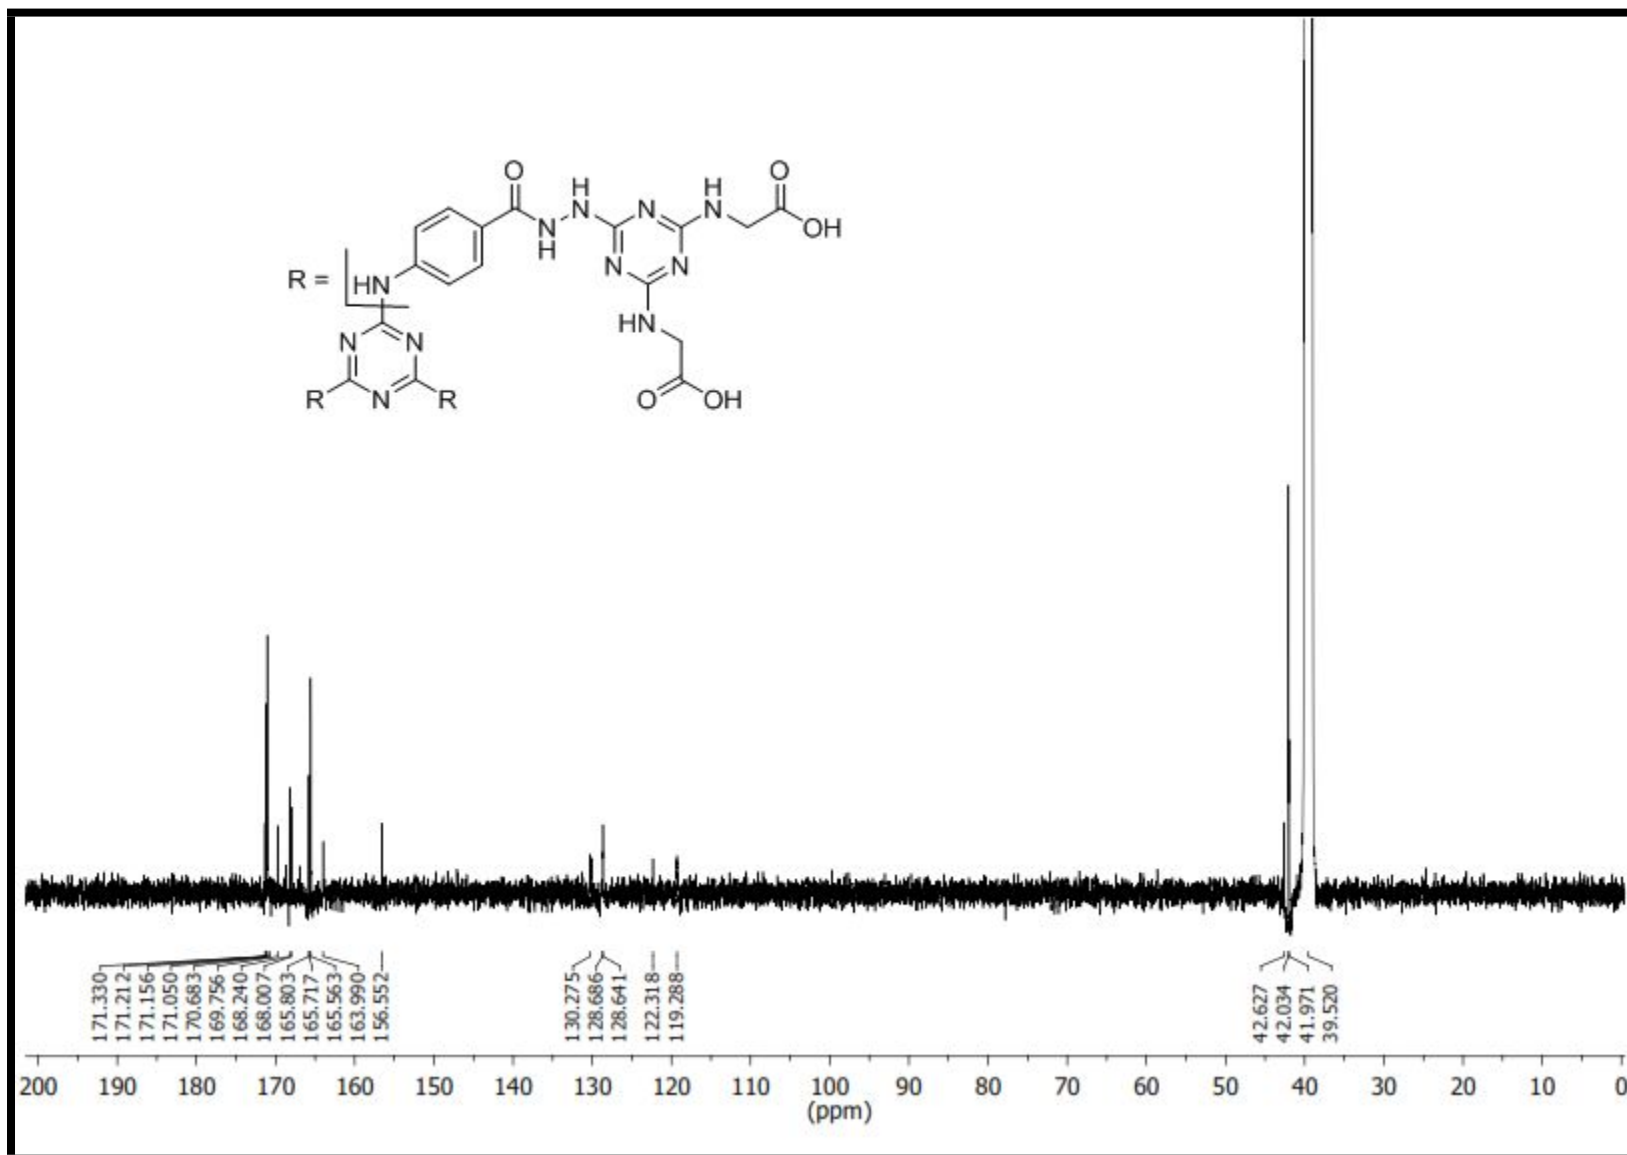

**Figure S3:**  $^{13}\text{C}$ -NMR (DMSO- $d_6$ ) spectrum of 2,2',2'',2''',2''''-(6,6',6''-(2,2',2''-(4,4',4''-(1,3,5-triazine-2,4,6-triyl)tris(azanediyl))tris(benzoyl))tris(hydrazine-2,1-diyl))tris(1,3,5-triazine-6,4,2-triyl))hexakis(azanediyl))hexaacetic acid **8a**.

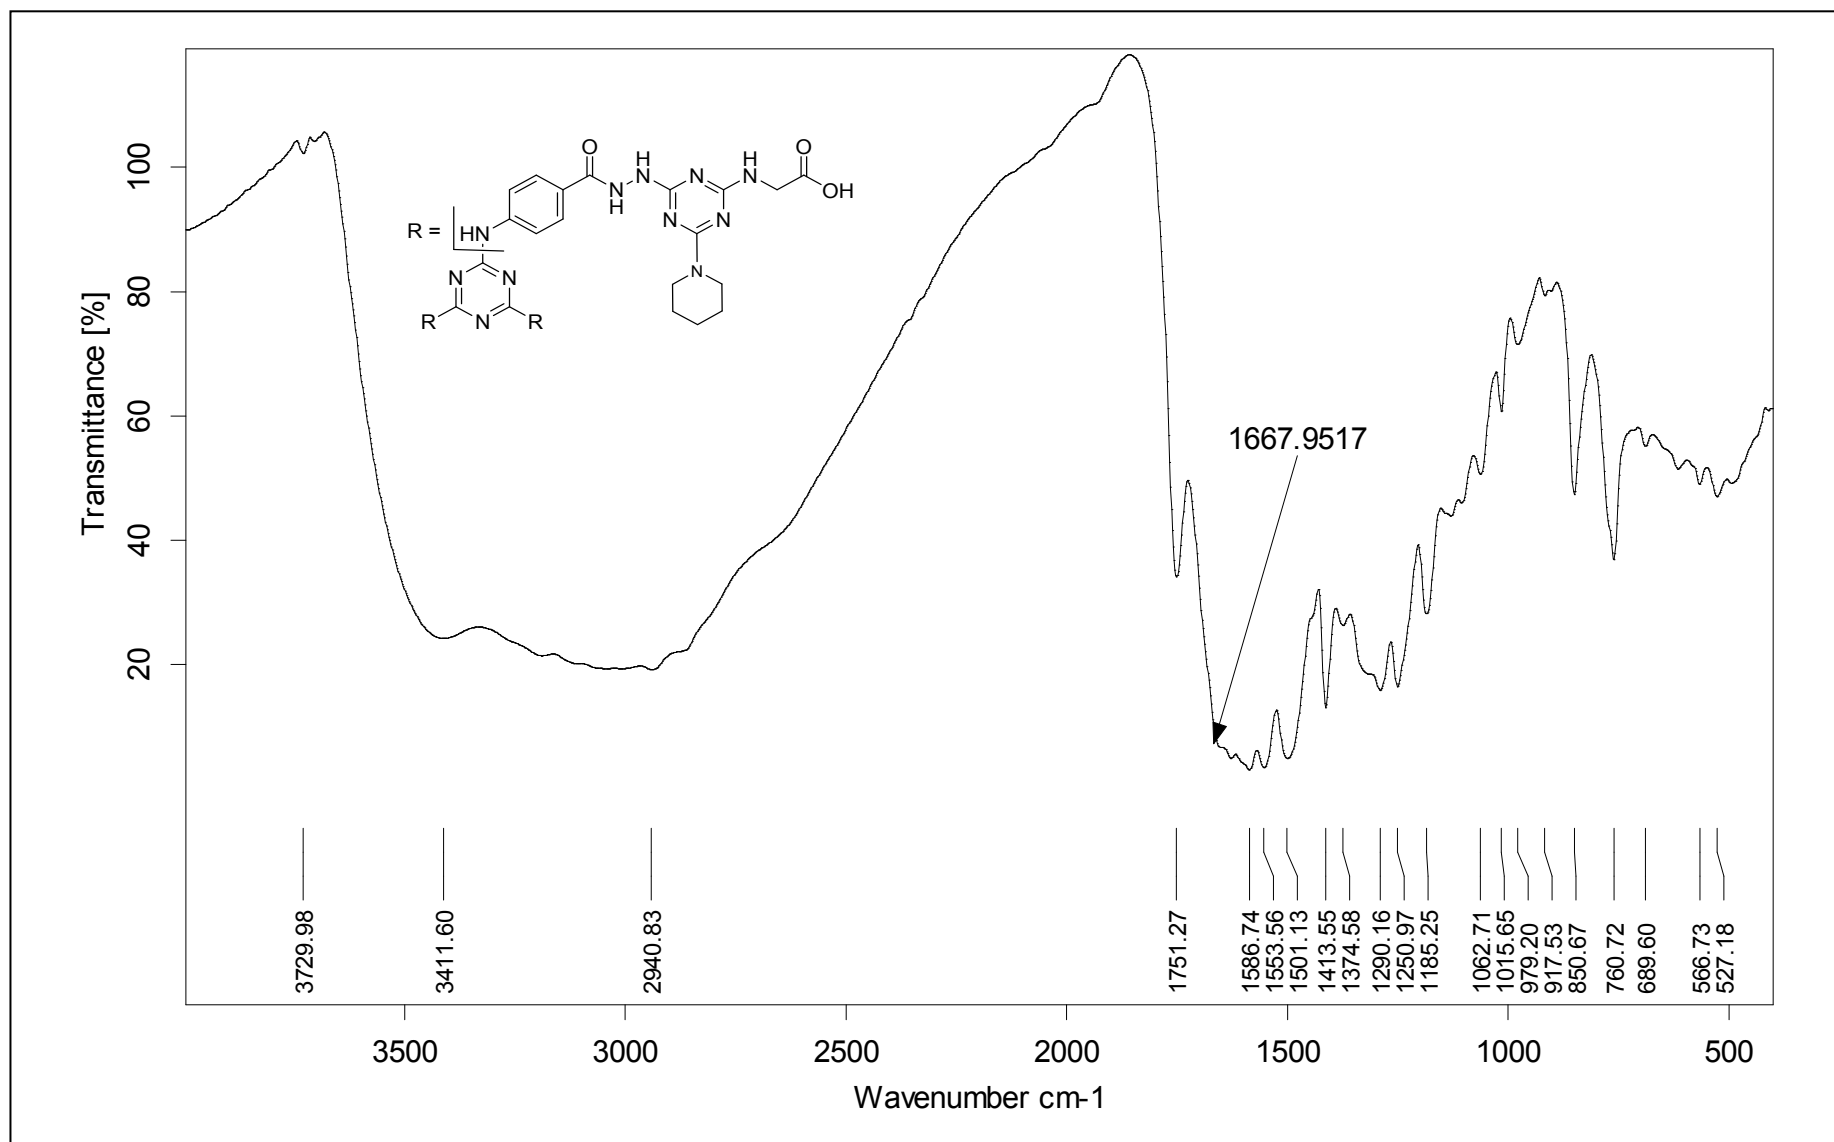

**Figure S4:** IR (KBr) spectrum of 2,2',2''-((6,6',6''-(2,2',2''-(4,4',4''-((1,3,5-triazine-2,4,6-triyl)tris(azanediyl))tris(benzoyl))tris(hydrazine-2,1-diyl))tris(4-(piperidin-1-yl)-1,3,5-triazine-6,2-diyl)tris(azanediyl))triacetic acid **8b**.

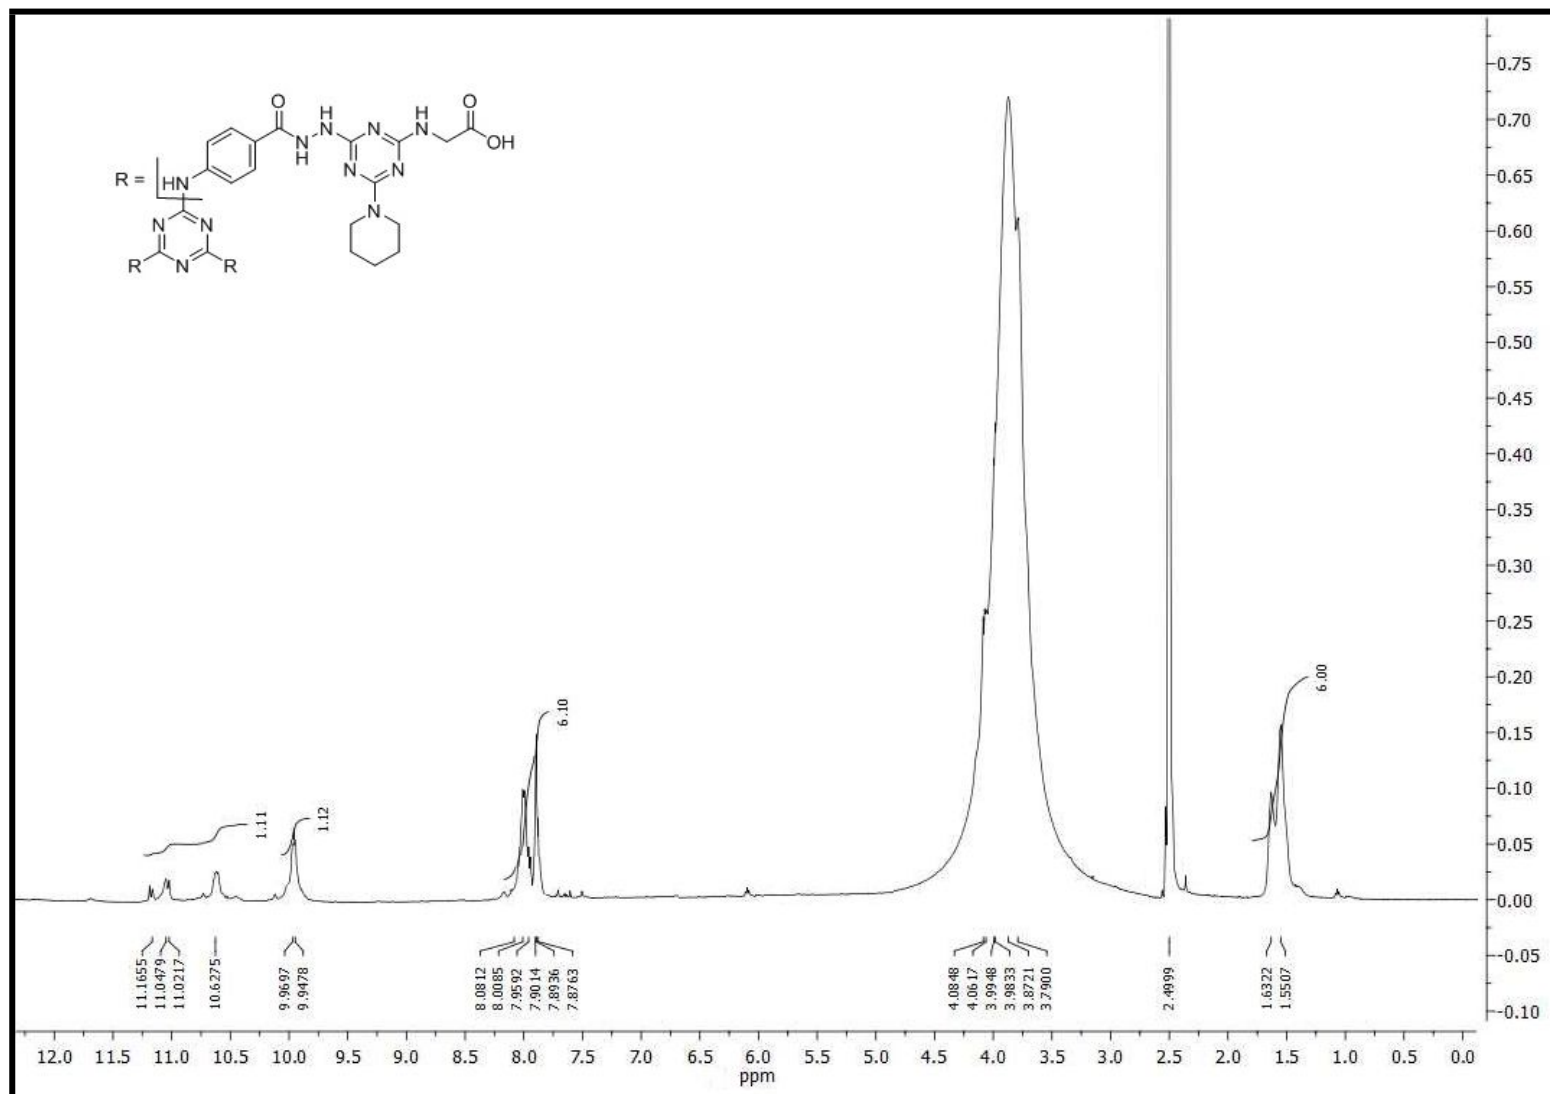

**Figure S5:** <sup>1</sup>H-NMR (DMSO-*d*<sub>6</sub>) spectrum of 2,2',2''-((6,6',6''-(2,2',2''-(4,4',4''-((1,3,5-triazine-2,4,6-triyl)tris(azanediyl))tris(benzoyl))tris(hydrazine-2,1-diyl))tris(4-(piperidin-1-yl)-1,3,5-triazine-6,2-diyl))tris(azanediyl))triacetic acid **8b**.

Nesreen SH.Kh 8b D2O  
single\_pulse

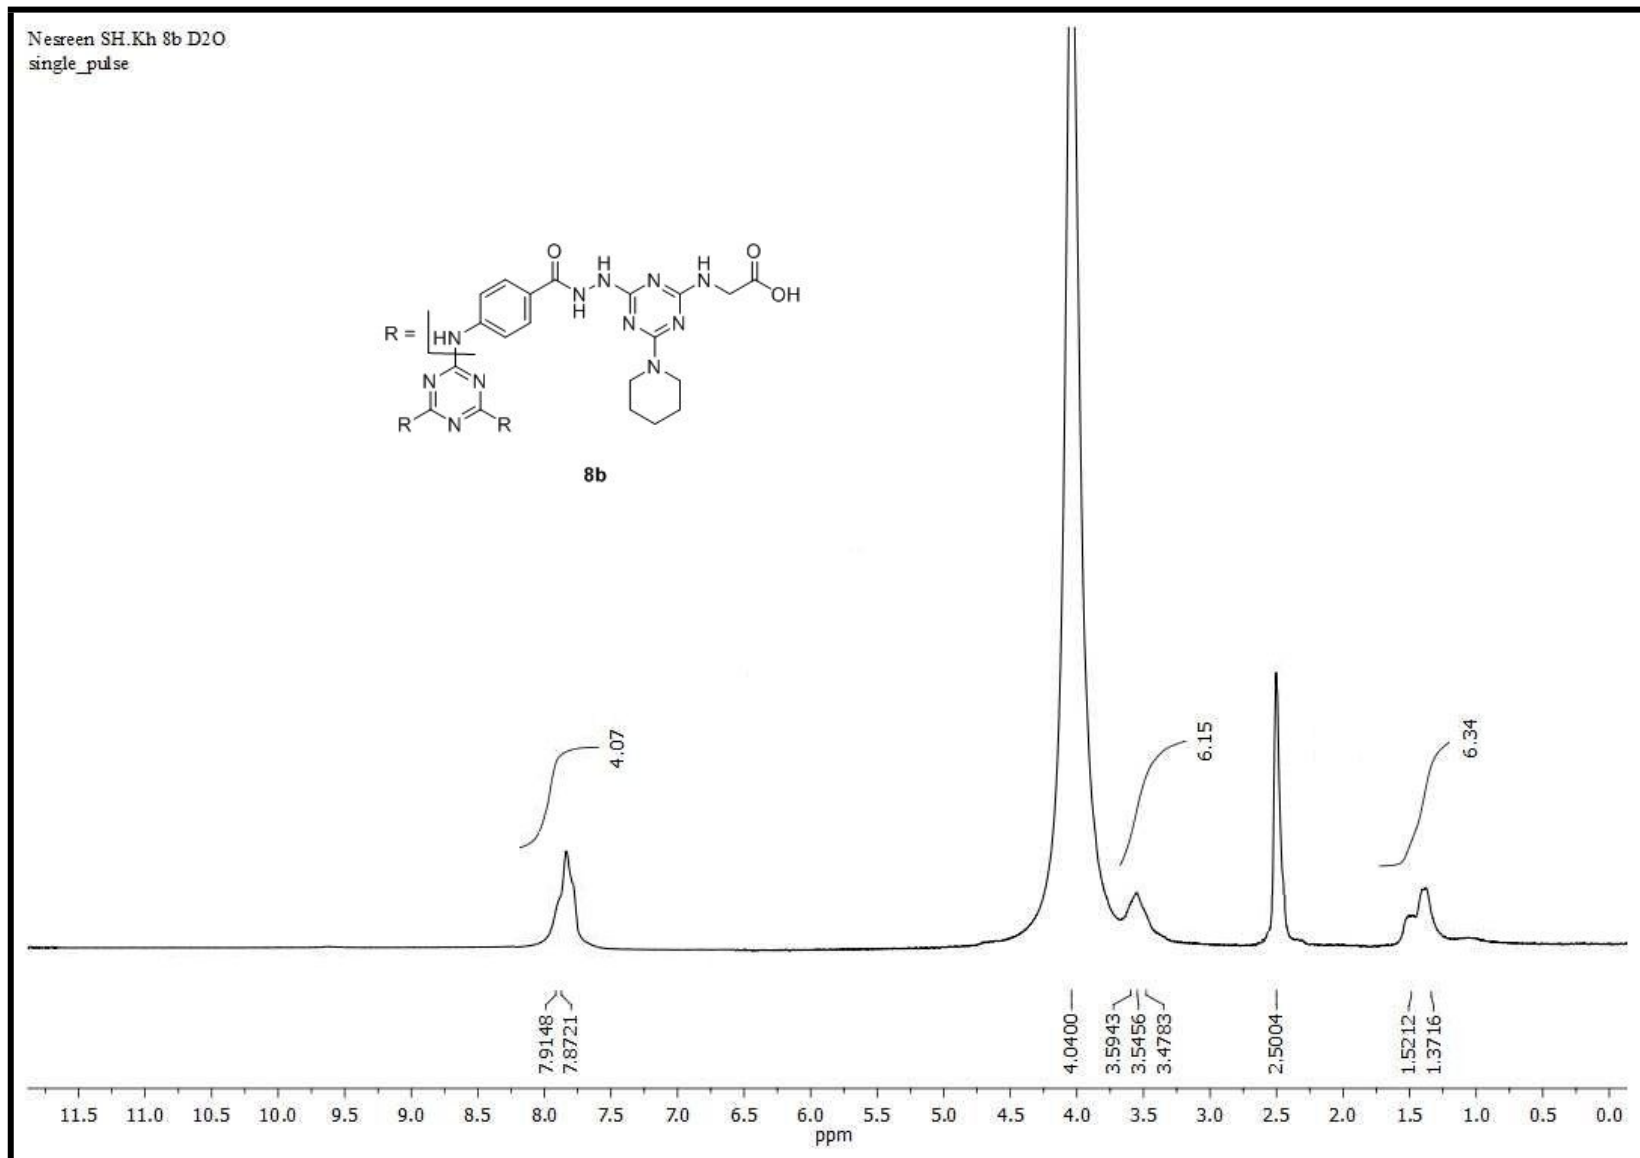

**Figure S6** <sup>1</sup>H-NMR (DMSO-*d*<sub>6</sub>/D<sub>2</sub>O) spectrum of 2,2',2''-((6,6',6''-(2,2',2''-(4,4',4''-(1,3,5-triazine-2,4,6-triyl)tris(azanediyl))tris(benzoyl))tris(hydrazine-2,1-diyl))tris(4-(piperidin-1-yl)-1,3,5-triazine-6,2-diyl))tris(azanediyl))triacetic acid **8b**.



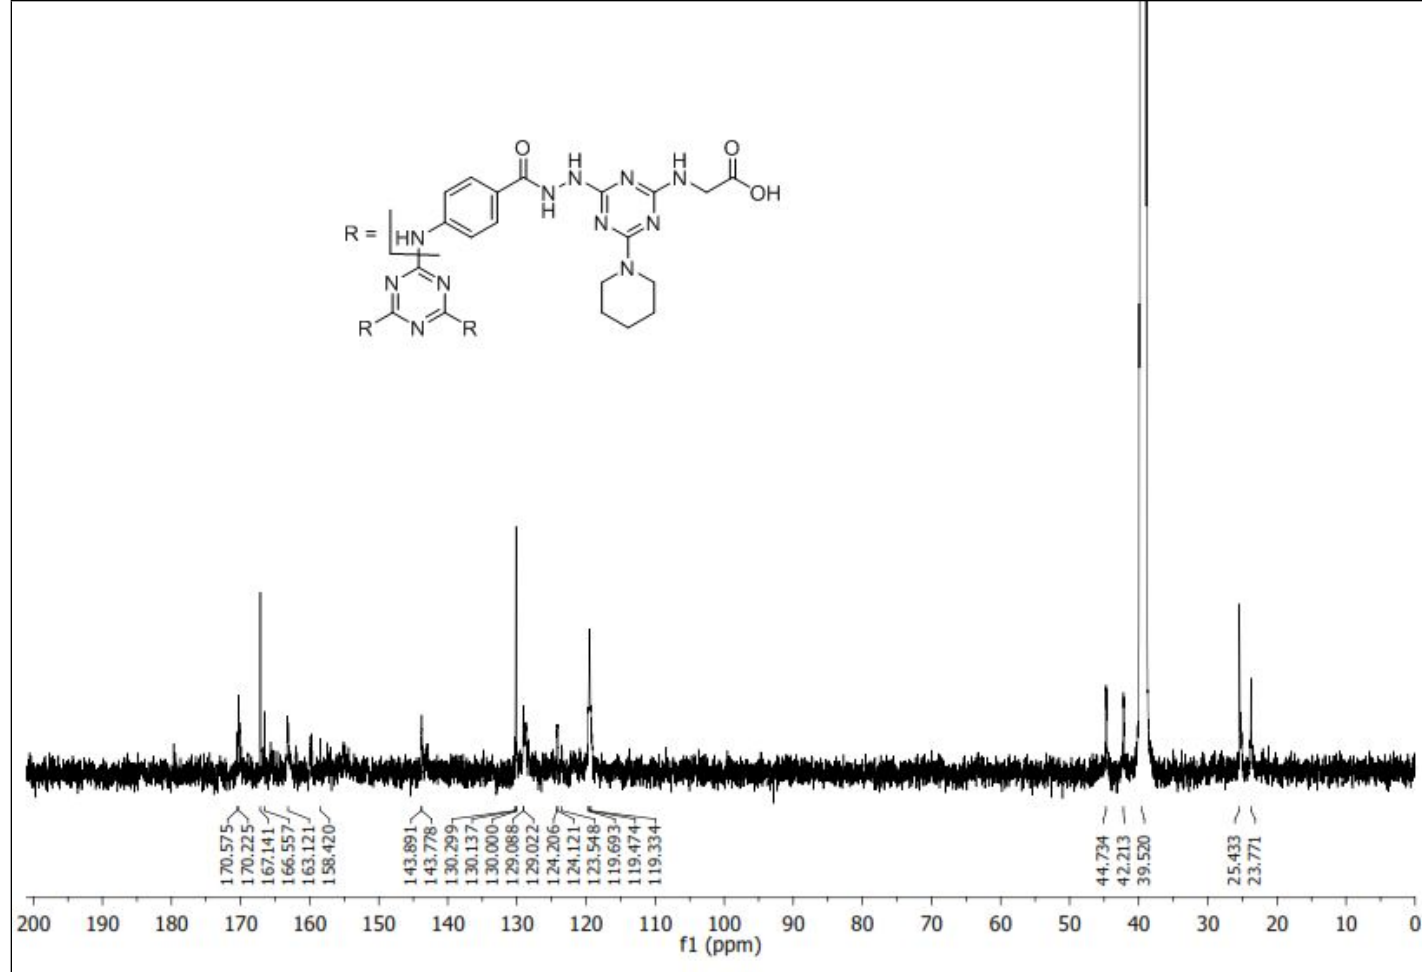

**Figure S7:** <sup>13</sup>C-NMR (DMSO-*d*<sub>6</sub>) spectrum of 2,2',2''-((6,6',6''-(2,2',2''-(4,4',4''-((1,3,5-triazine-2,4,6-triyl)tris(azanediyl))tris(benzoyl))tris(hydrazine-2,1-diyl)) tris(4-(piperidin-1-yl)-1,3,5-triazine-6,2-diyl))tris(azanediyl))triacetic acid **8b**.

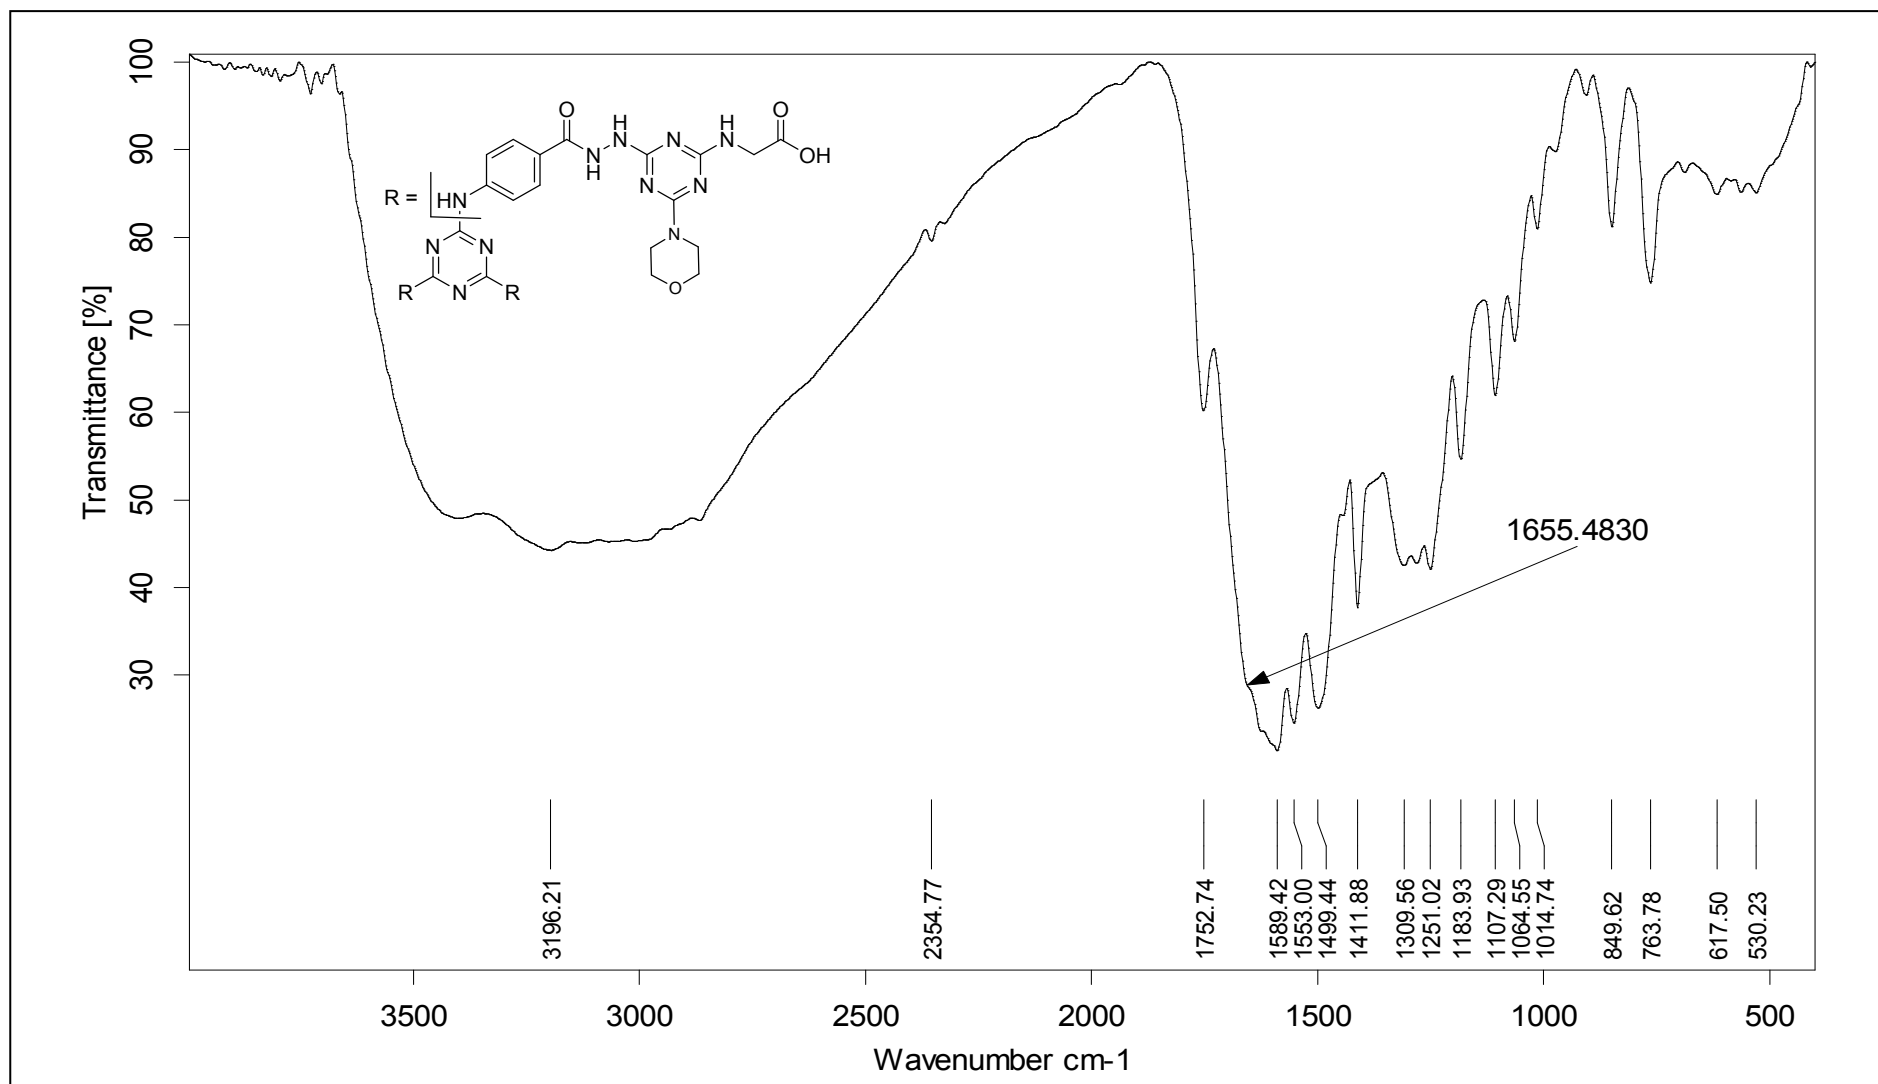

**Figure S8:** IR (KBr) spectrum of 2,2',2''-((6,6',6''-(2,2',2''-(4,4',4''-((1,3,5-triazine-2,4,6-triyl)tris(azanediyl))tris(benzoyl))tris(hydrazine-2,1-diyl))tris(4-morpholino-1,3,5-triazine-6,2-diyl))tris(azanediyl))triacetic acid **8c**.

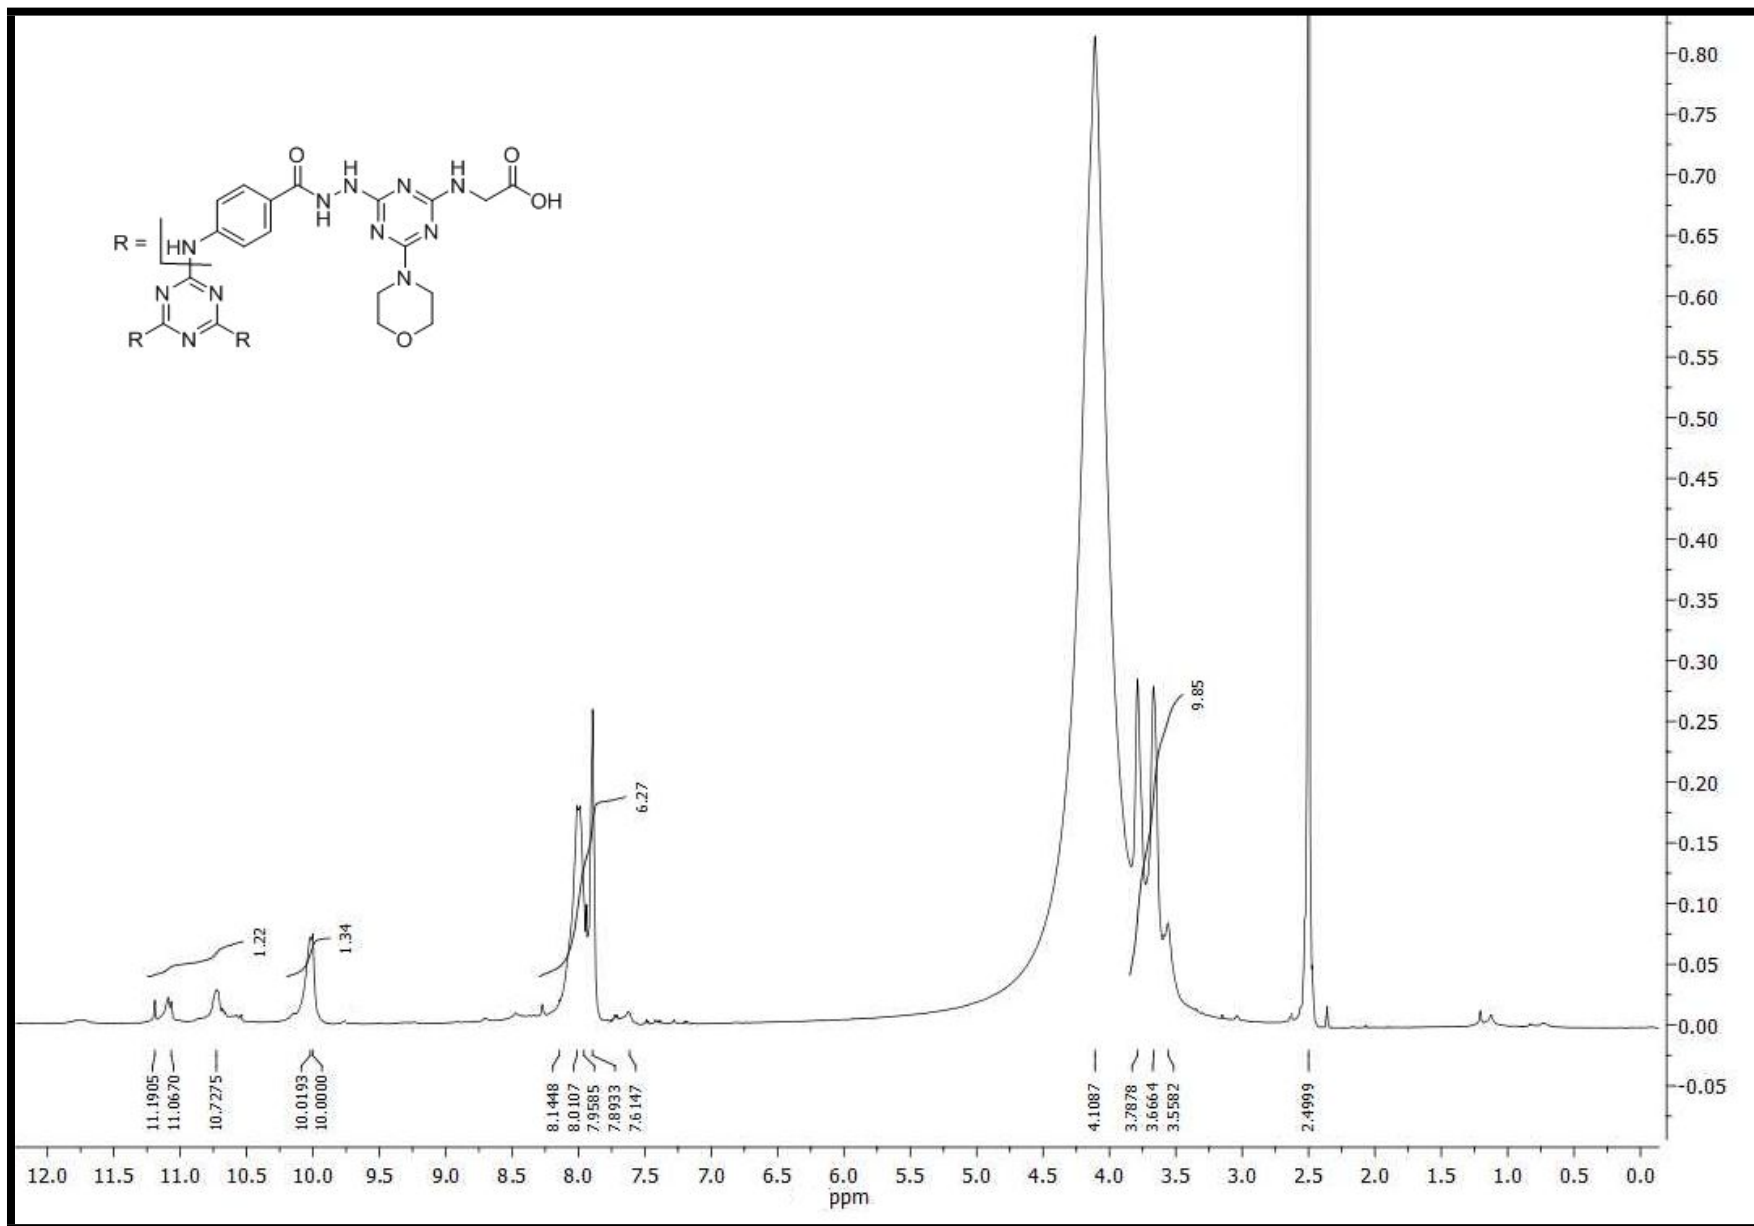

**Figure 9:** <sup>1</sup>H-NMR (DMSO-*d*<sub>6</sub>) spectrum of 2,2',2''-((6,6',6''-(2,2',2''-(4,4',4''-(1,3,5-triazine-2,4,6-triyl)tris(azanediyl))tris(benzoyl))tris(hydrazine-2,1-diyl))tris(4-morpholino-1,3,5-triazine-6,2-diyl))tris(azanediyl))triacetic acid **8c**.

Nesreen SH.Kh 8c D2O  
single\_pulse

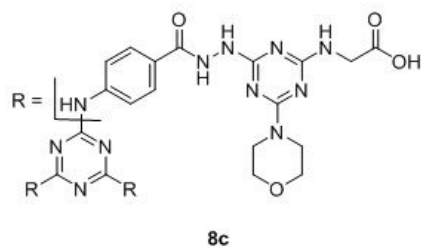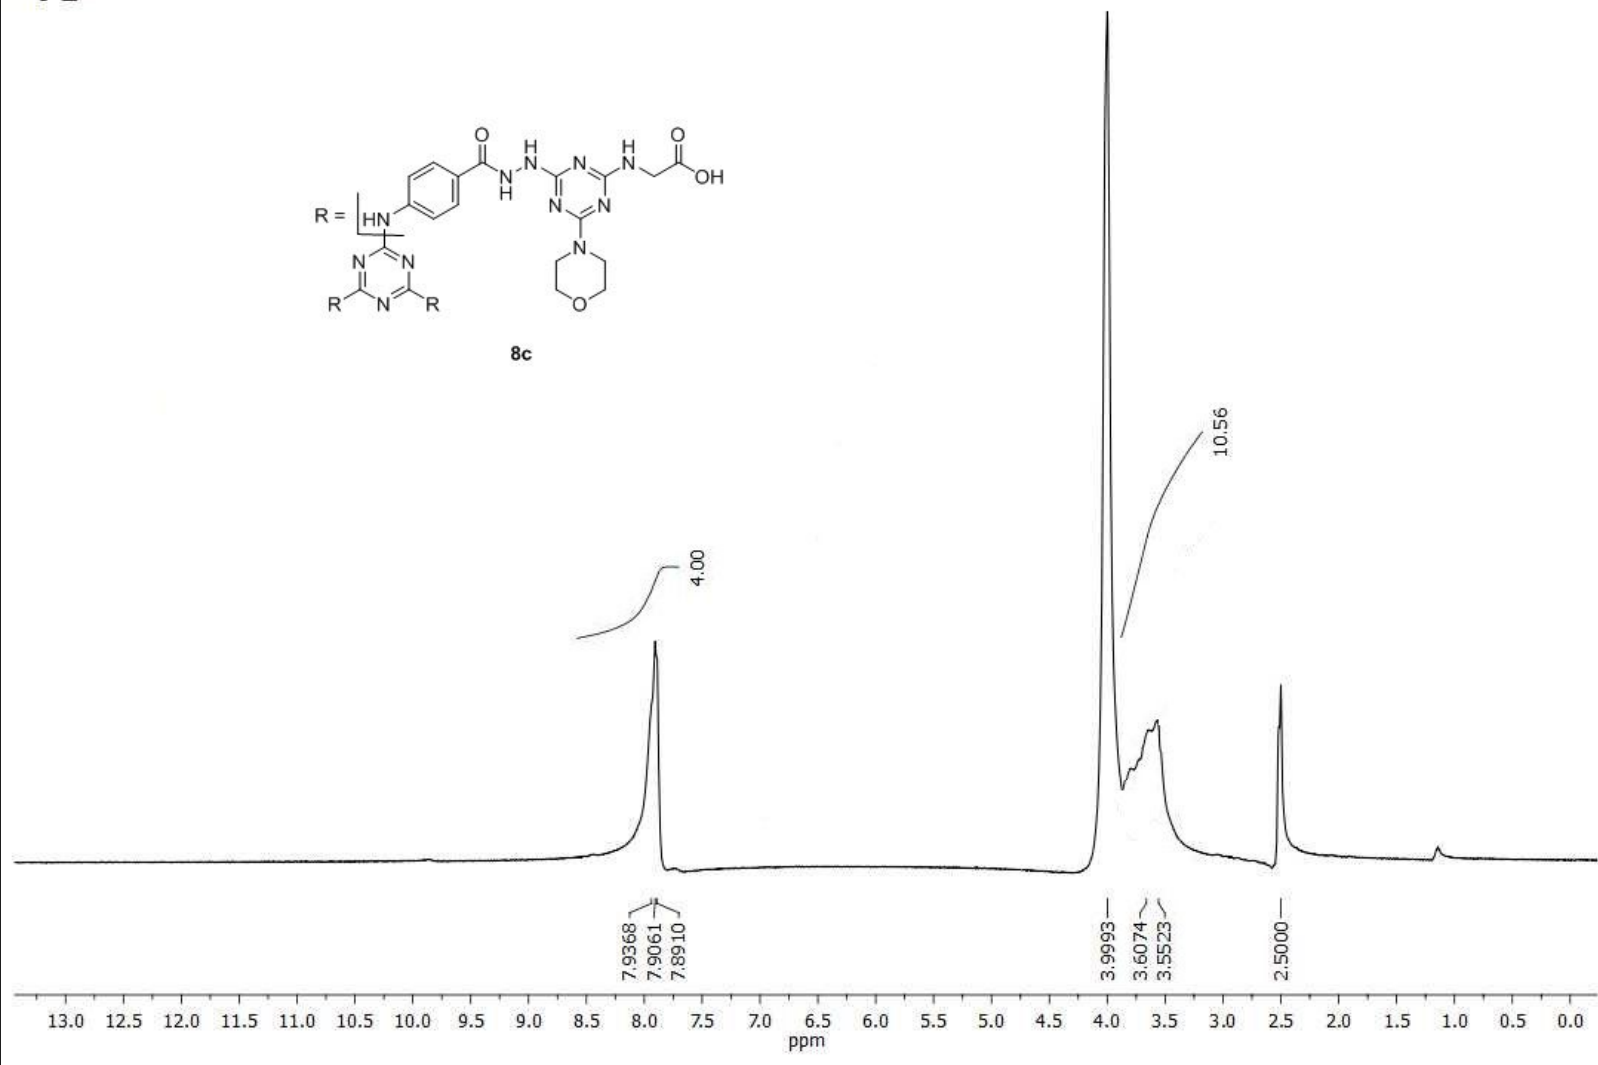

**Figure S10:**  $^1\text{H-NMR}$  ( $\text{DMSO-}d_6$ ,  $\text{D}_2\text{O}$ ) spectrum of 2,2',2''-((6,6',6''-(2,2',2''-(4,4',4''-((1,3,5-triazine-2,4,6-triyl)tris(azanediy))tris(benzoyl))tris(hydrazine-2,1-diyl))tris(4-morpholino-1,3,5-triazine-6,2-diyl))tris(azanediy))triacetic acid **8c**.

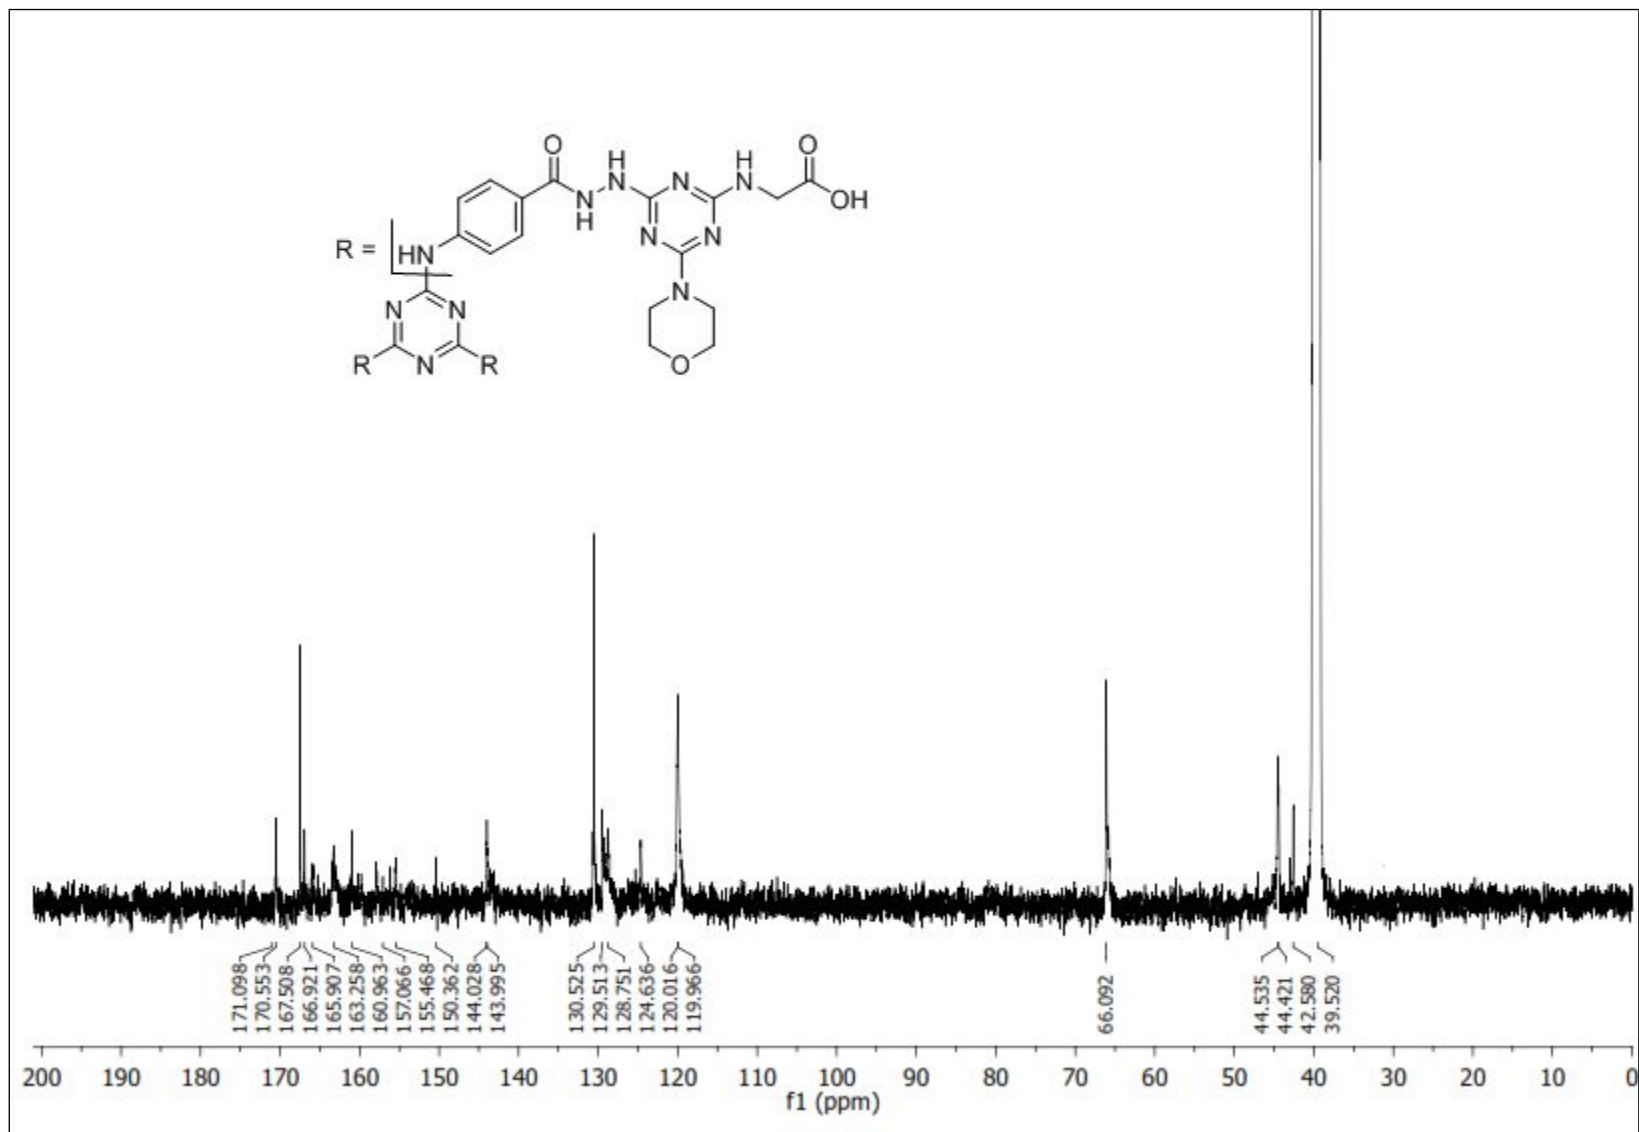

**Figure S11:**  $^{13}\text{C-NMR}$  (DMSO- $d_6$ ) spectrum of 2,2',2''-((6,6',6''-(2,2',2''-(4,4',4''-((1,3,5-triazine-2,4,6-triyl)tris(azanediyl))tris(benzoyl))tris(hydrazine-2,1-diyl))tris(4-morpholino-1,3,5-triazine-6,2-diyl))tris(azanediyl))triacetic acid **8c**.

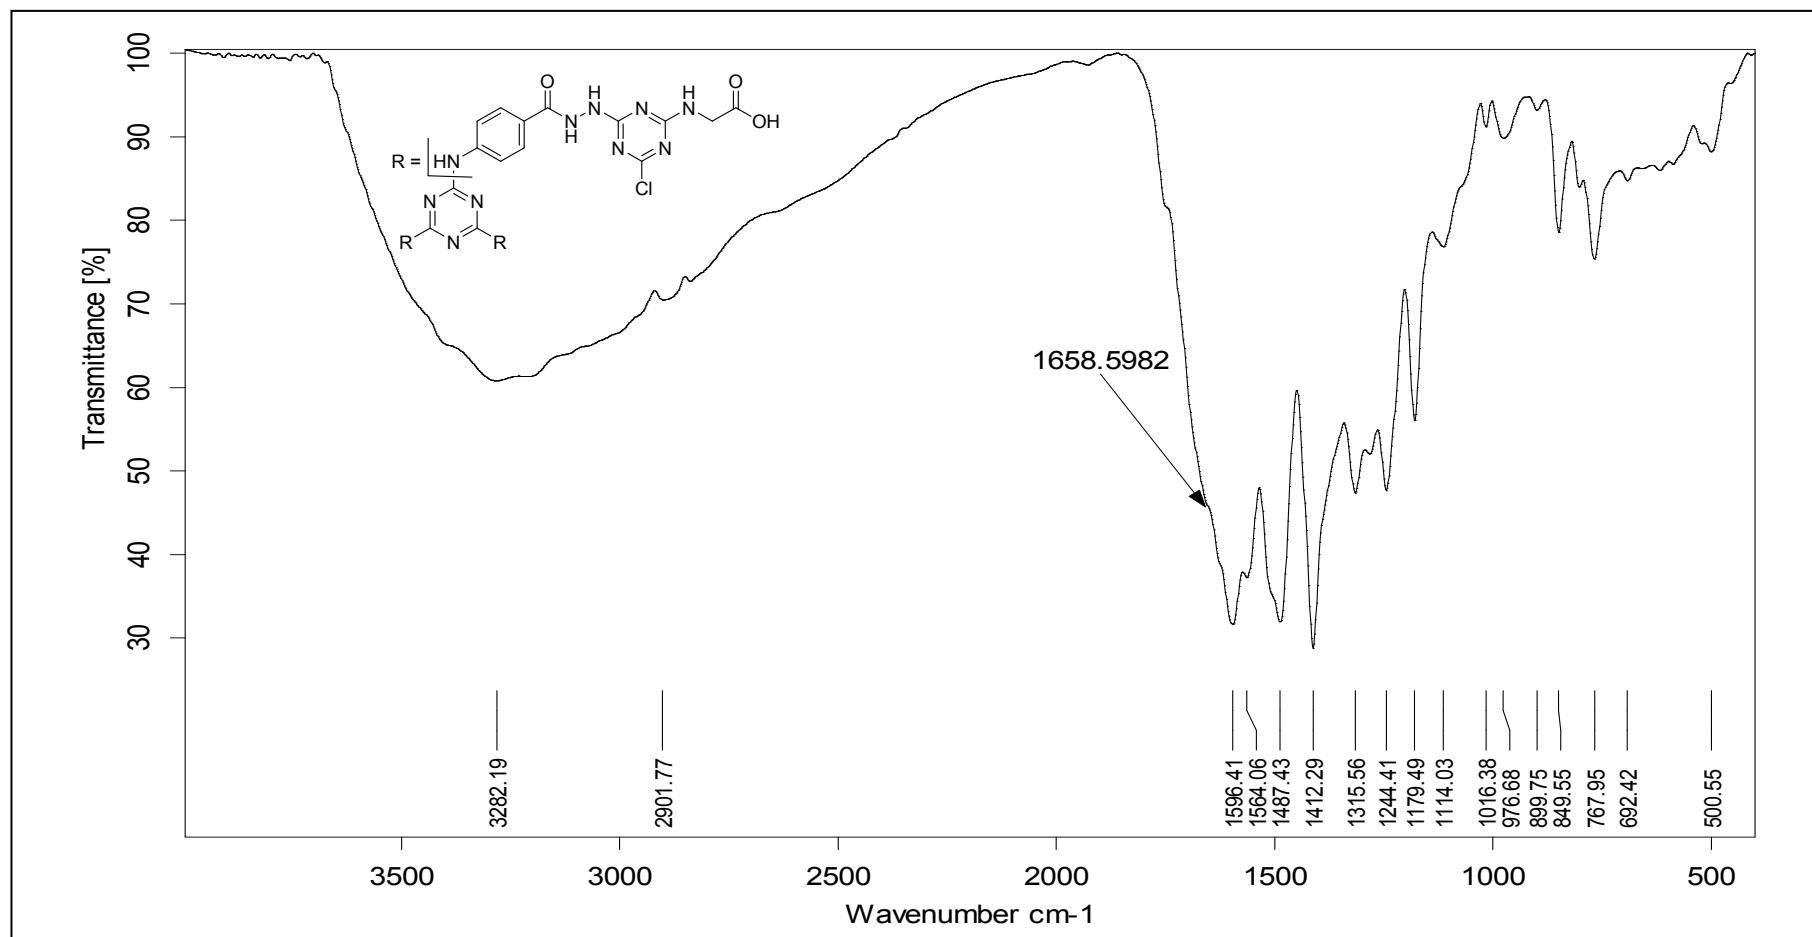

**Figure S12:** IR (KBr) spectrum of 2,2',2''-((6,6',6''-(2,2',2''-(4,4',4''-((1,3,5-triazine-2,4,6-triyl)tris(azanediy))tris(benzoyl))tris(hydrazine-2,1-diyl))tris(4-(chloro-1,3,5-triazine-6,2-diyl))tris(azanediy))triacetic acid **10**.

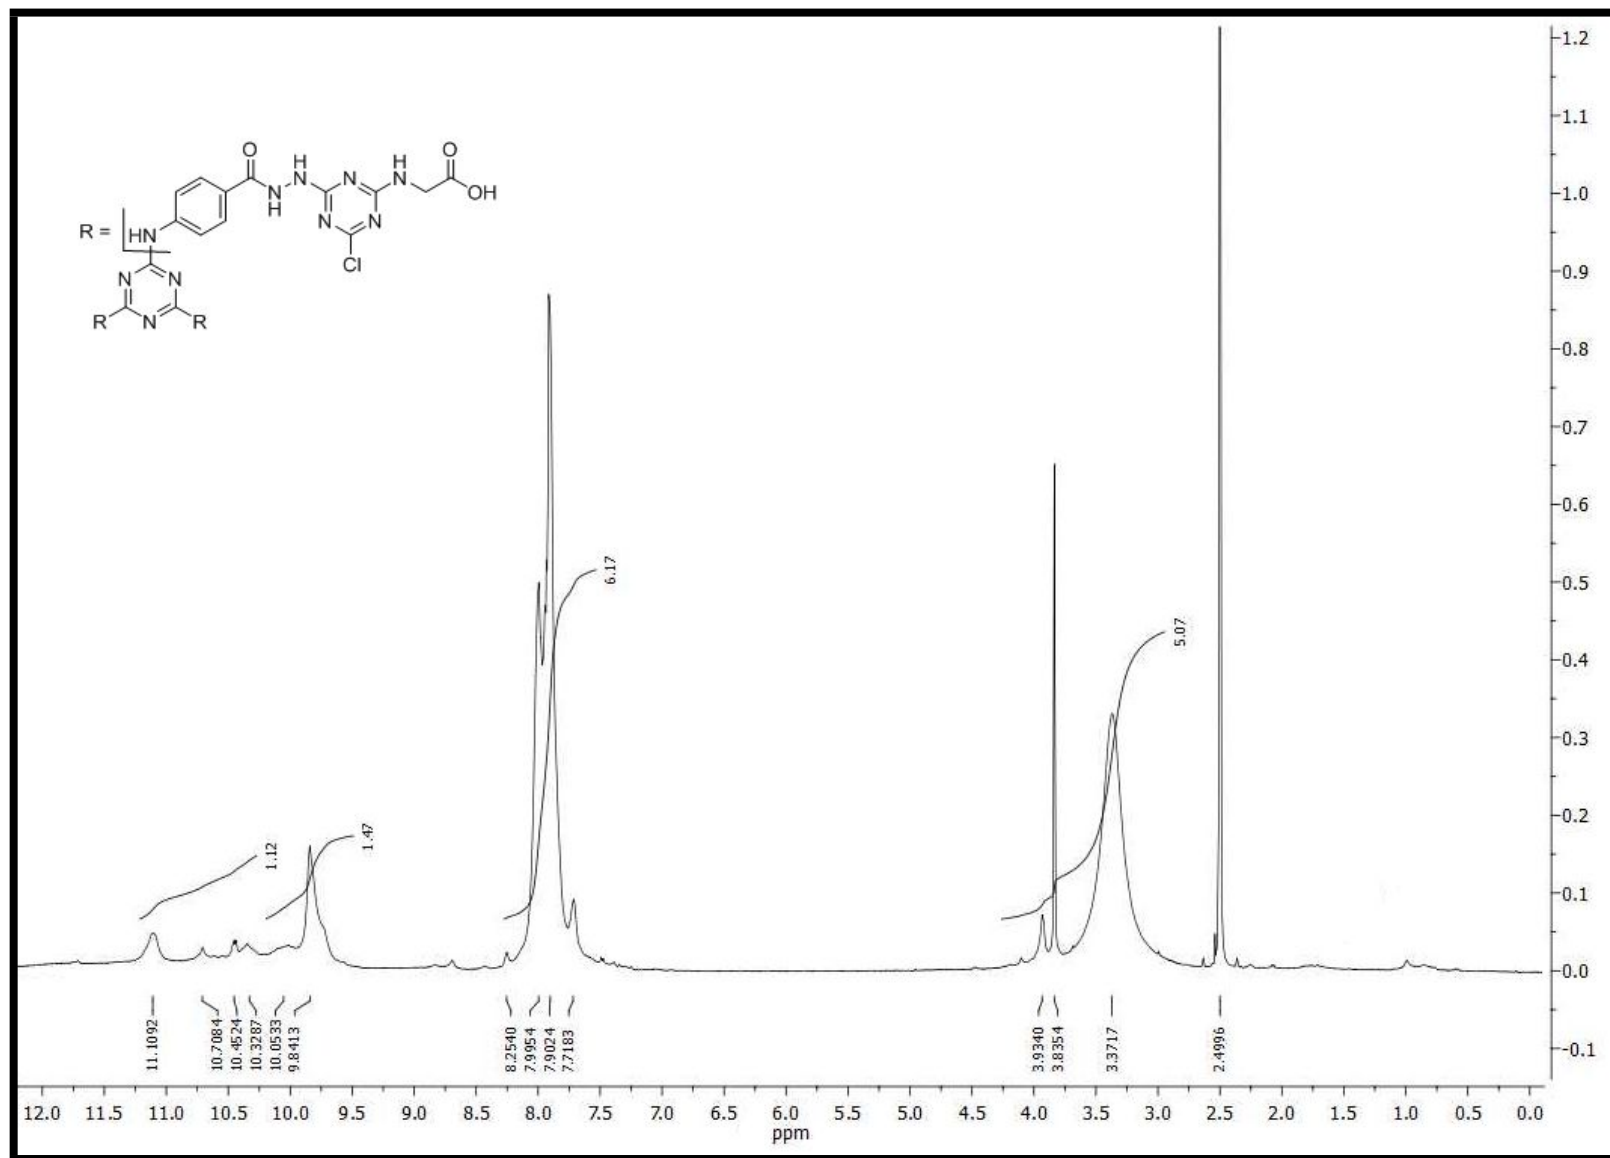

**Figure S13:** <sup>1</sup>H-NMR (DMSO-*d*<sub>6</sub>) spectrum of 2,2',2''-((6,6',6''-(2,2',2''-(4,4',4''-(1,3,5-triazine-2,4,6-triyl)tris(azanediy))tris(benzoyl))tris(hydrazine-2,1-diyl))tris(4-(chloro-1,3,5-triazine-6,2-diyl))tris(azanediy))triacetic acid **10**.

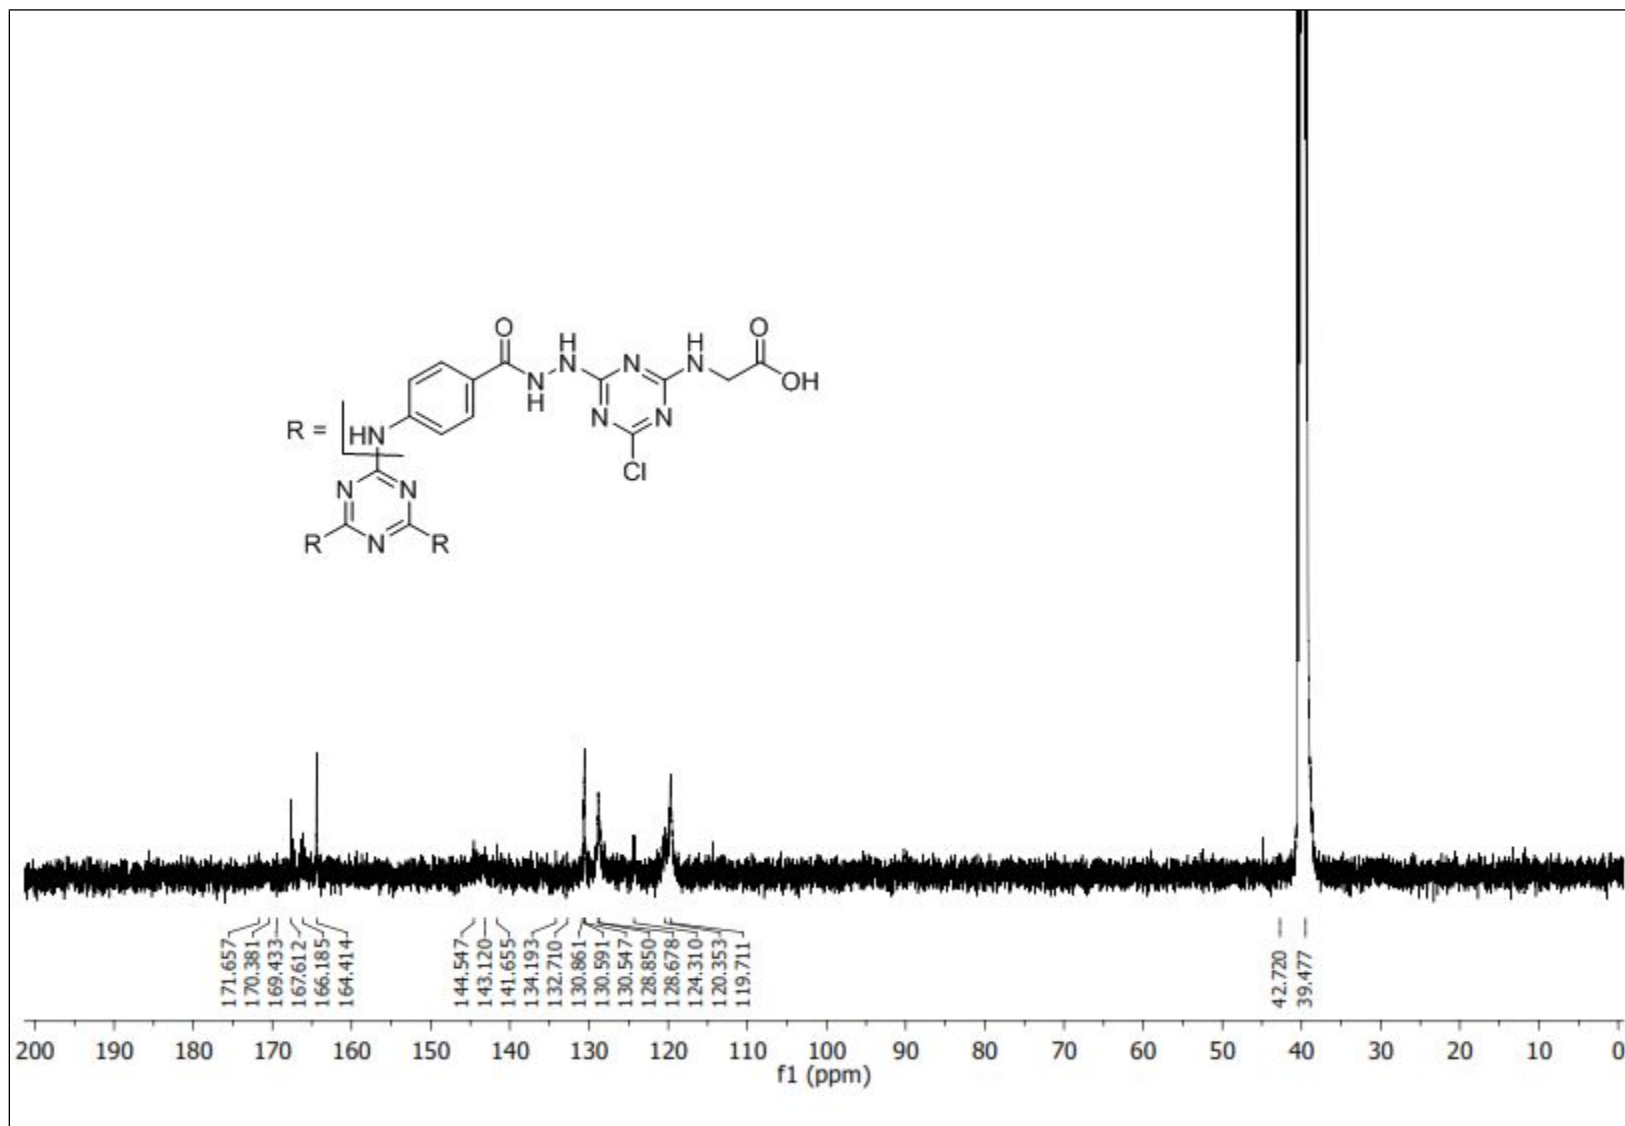

**Figure S14:** <sup>13</sup>C-NMR (DMSO-*d*<sub>6</sub>) spectrum of 2,2',2''-((6,6',6''-(2,2',2''-(4,4',4''-((1,3,5-triazine-2,4,6-triyl)tris(azanediyloxy))tris(benzoyl))tris(hydrazine-2,1-diyl))tris(4-(chloro-1,3,5-triazine-6,2-diyl))tris(azanediyloxy))triacetic acid **10**.



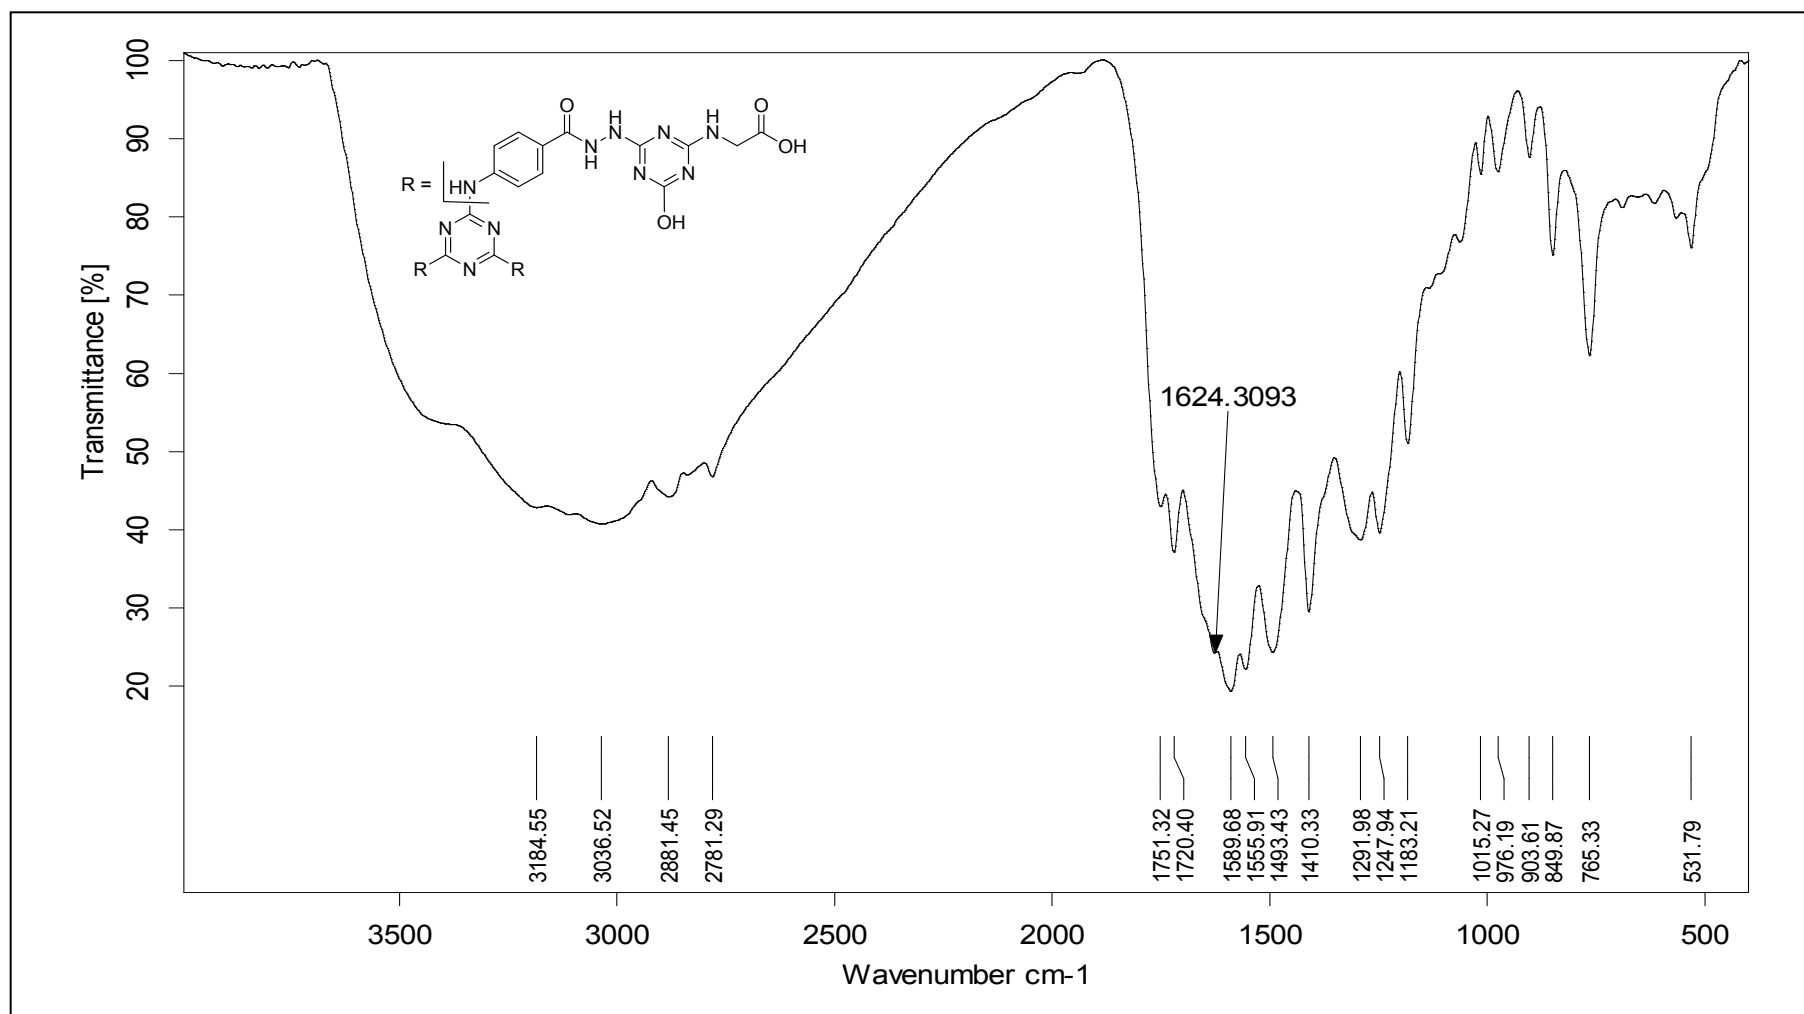

**Figure S15:** IR (KBr) spectrum of 2,2',2''-((6,6',6''-(2,2',2''-(4,4',4''-((1,3,5-triazine-2,4,6-triyl)tris(azanediyloxy))tris(benzoyloxy))tris(hydrazine-2,1-diyloxy))tris(4-(hydroxy-1,3,5-triazine-6,2-diyloxy))tris(azanediyloxy))triacetic acid **11**.

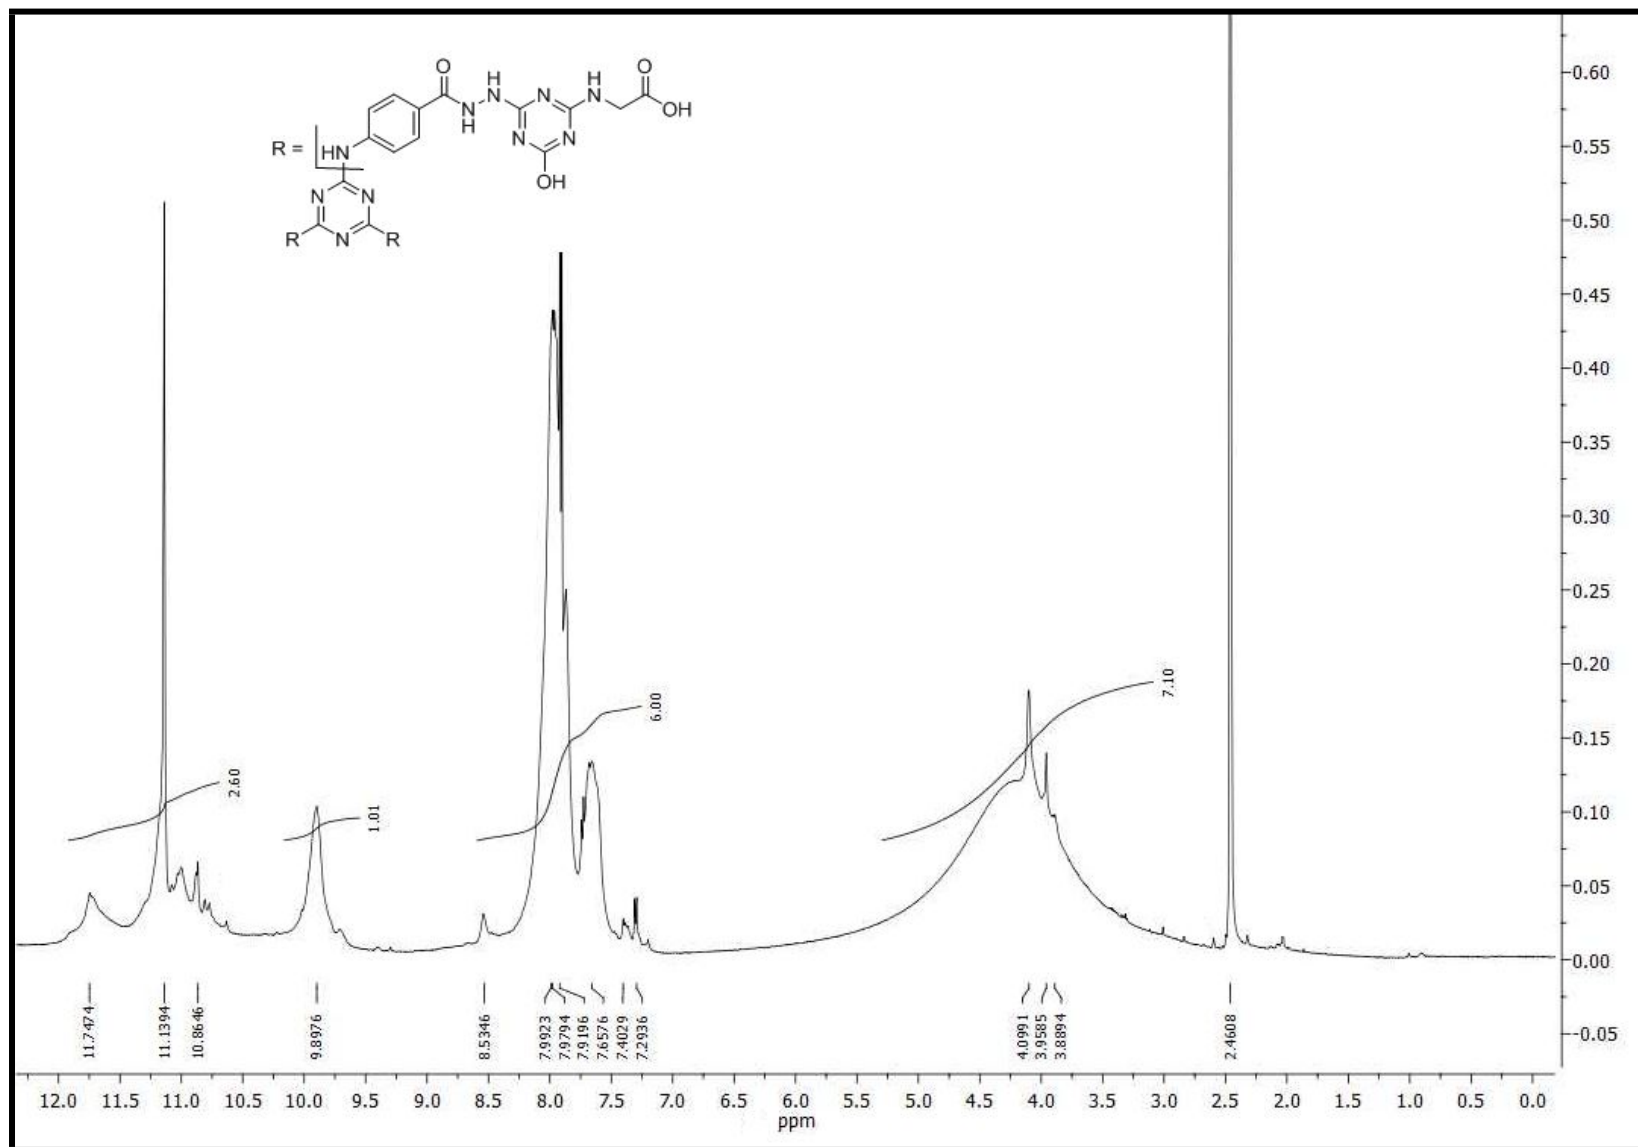

**Figure S16:**  $^1\text{H-NMR}$  ( $\text{DMSO-}d_6$ ) spectrum of 2,2',2''-((6,6',6''-(2,2',2''-(4,4',4''-((1,3,5-triazine-2,4,6-triyl)tris(azanediyl))tris(benzoyl))tris(hydrazine-2,1-diy))tris(4-(hydroxy-1,3,5-triazine-6,2-diyl))tris(azanediyl))triacetic acid **11**.

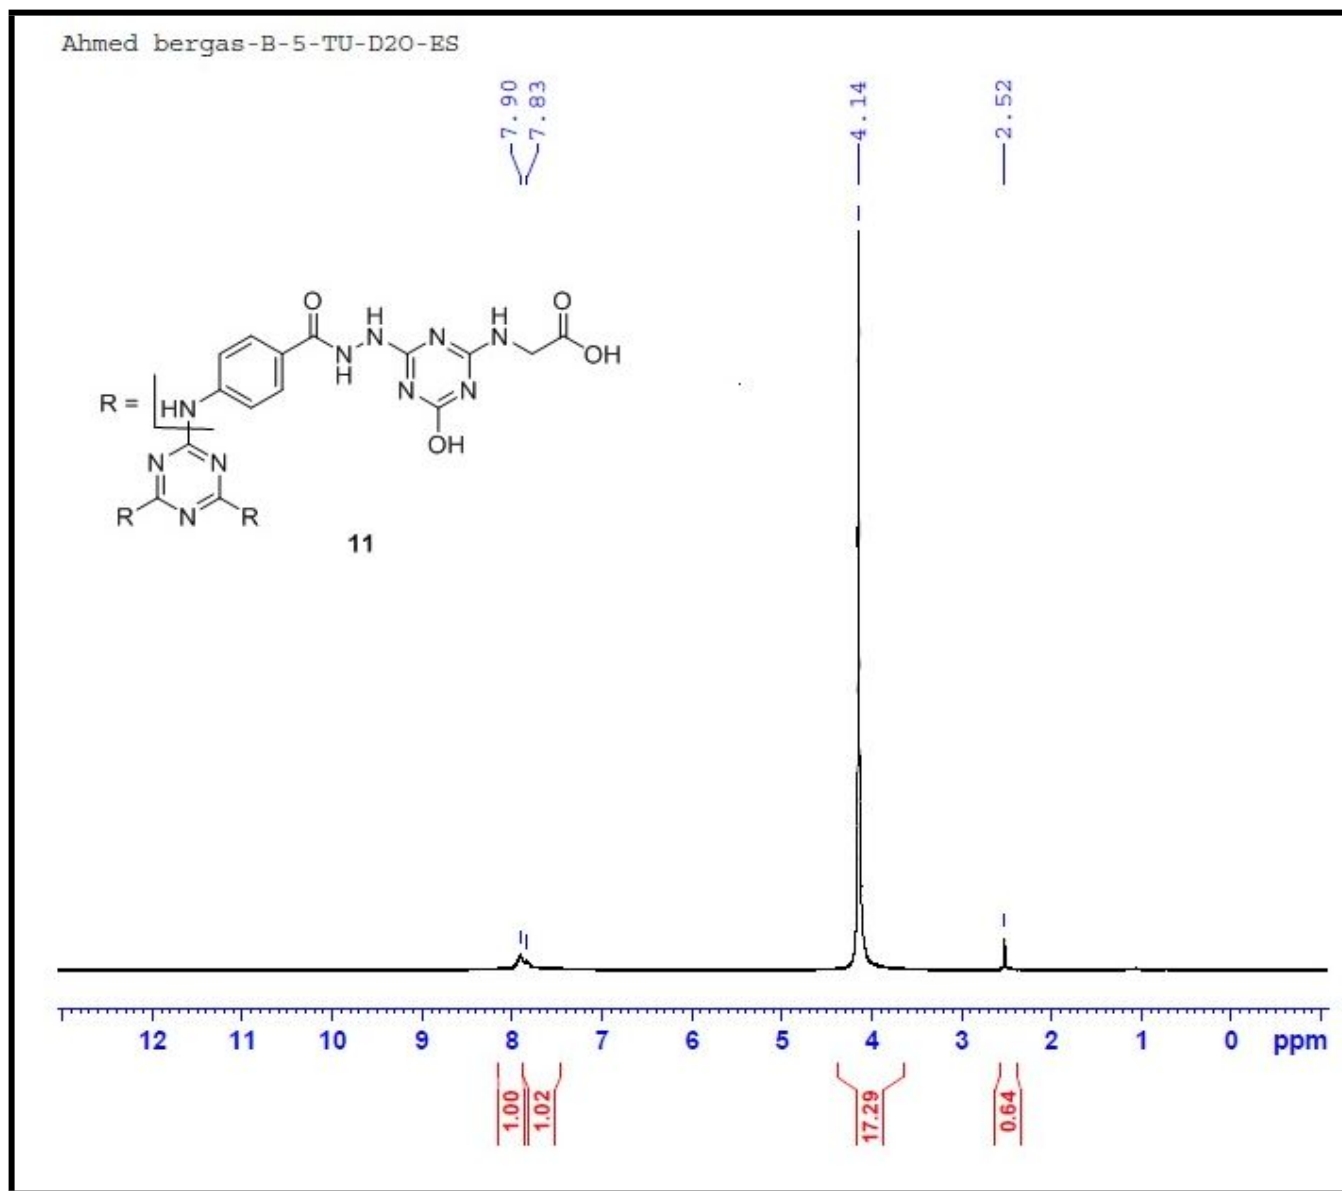

**Figure S17:**  $^1\text{H-NMR}$  (DMSO- $d_6$ , D $_2$ O) spectrum of 2,2',2''-((6,6',6''-(2,2',2''-(4,4',4''-((1,3,5-triazine-2,4,6-triyl)tris(azanediyl))tris(benzoyl))tris(hydrazine-2,1-diyl))tris(4-(hydroxy-1,3,5-triazine-6,2-diyl))tris(azanediyl))triacetic acid **11**.

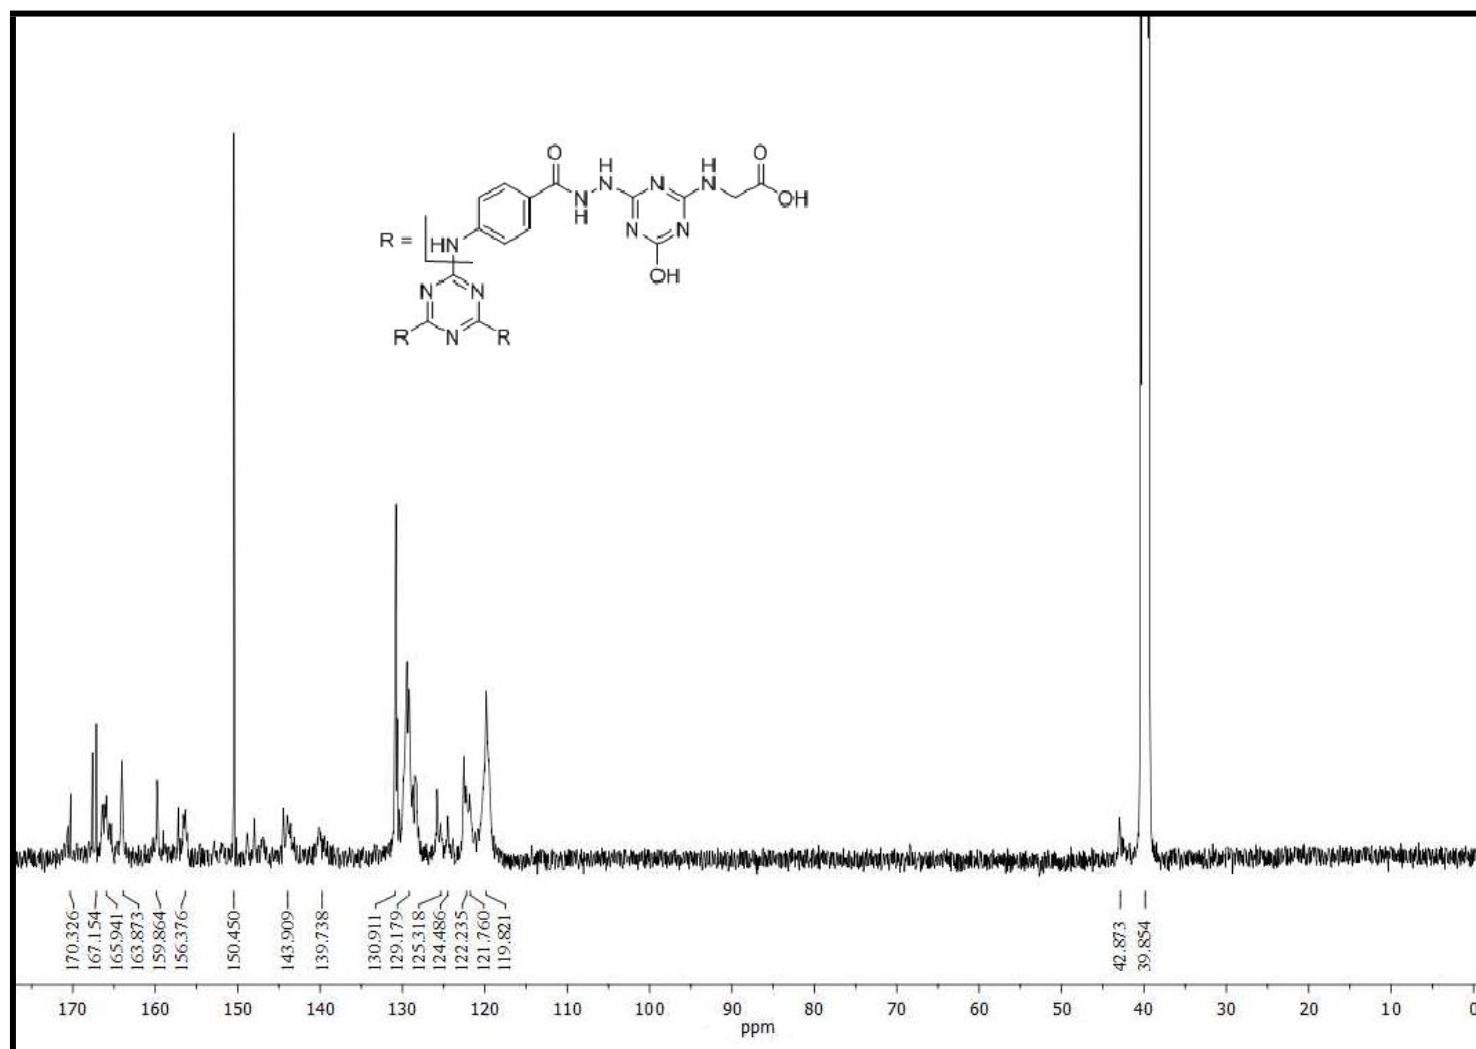

**Figure S18:** <sup>13</sup>C-NMR (DMSO-*d*<sub>6</sub>) spectrum of 2,2',2''-((6,6',6''-(2,2',2''-(4,4',4''-((1,3,5-triazine-2,4,6-triyl)tris(azanediy))tris(benzoyl))tris(hydrazine-2,1-diyl))tris(4-(hydroxy-1,3,5-triazine-6,2-diyl))tris(azanediy))triacetic acid **11**.

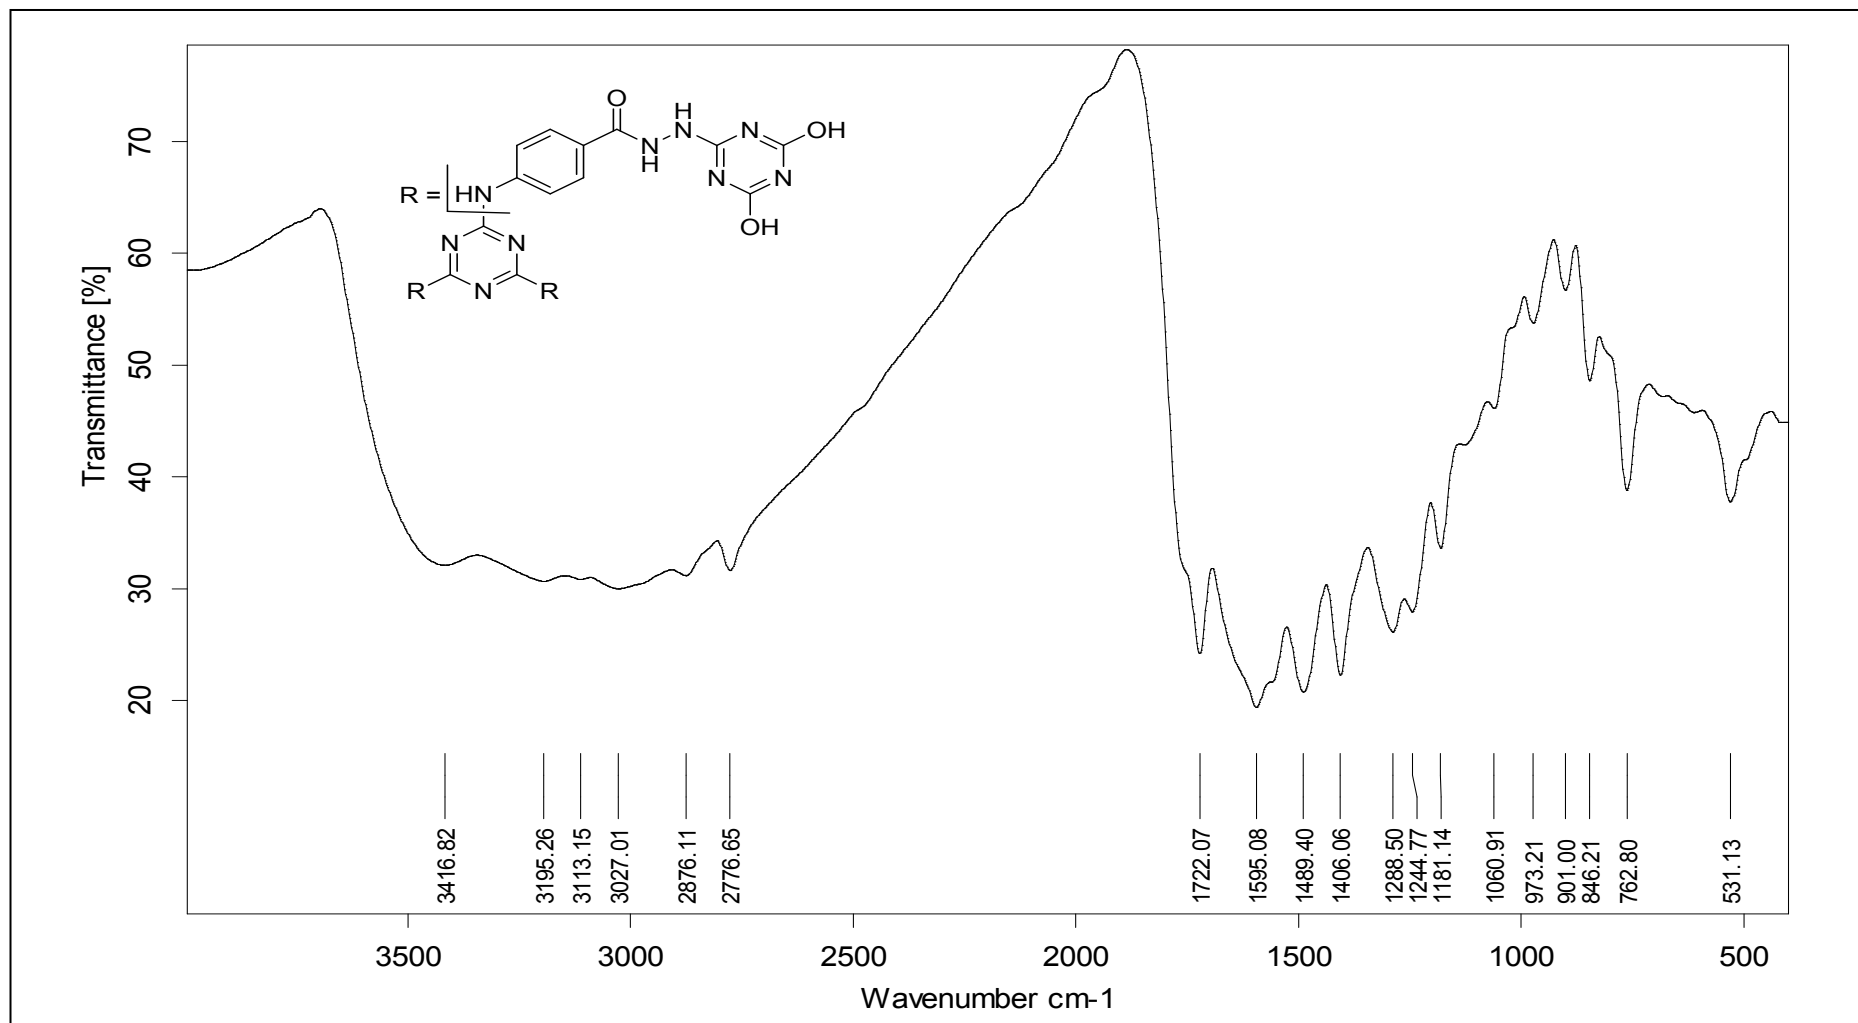

**Figure S19:** IR (KBr) spectrum of 4,4',4''-((1,3,5-triazine-2,4,6-triyl)tris(azanediyl))tris(*N'*-(4,6-dihydroxy-1,3,5-triazin-2-yl)benzohydrazide) **12**

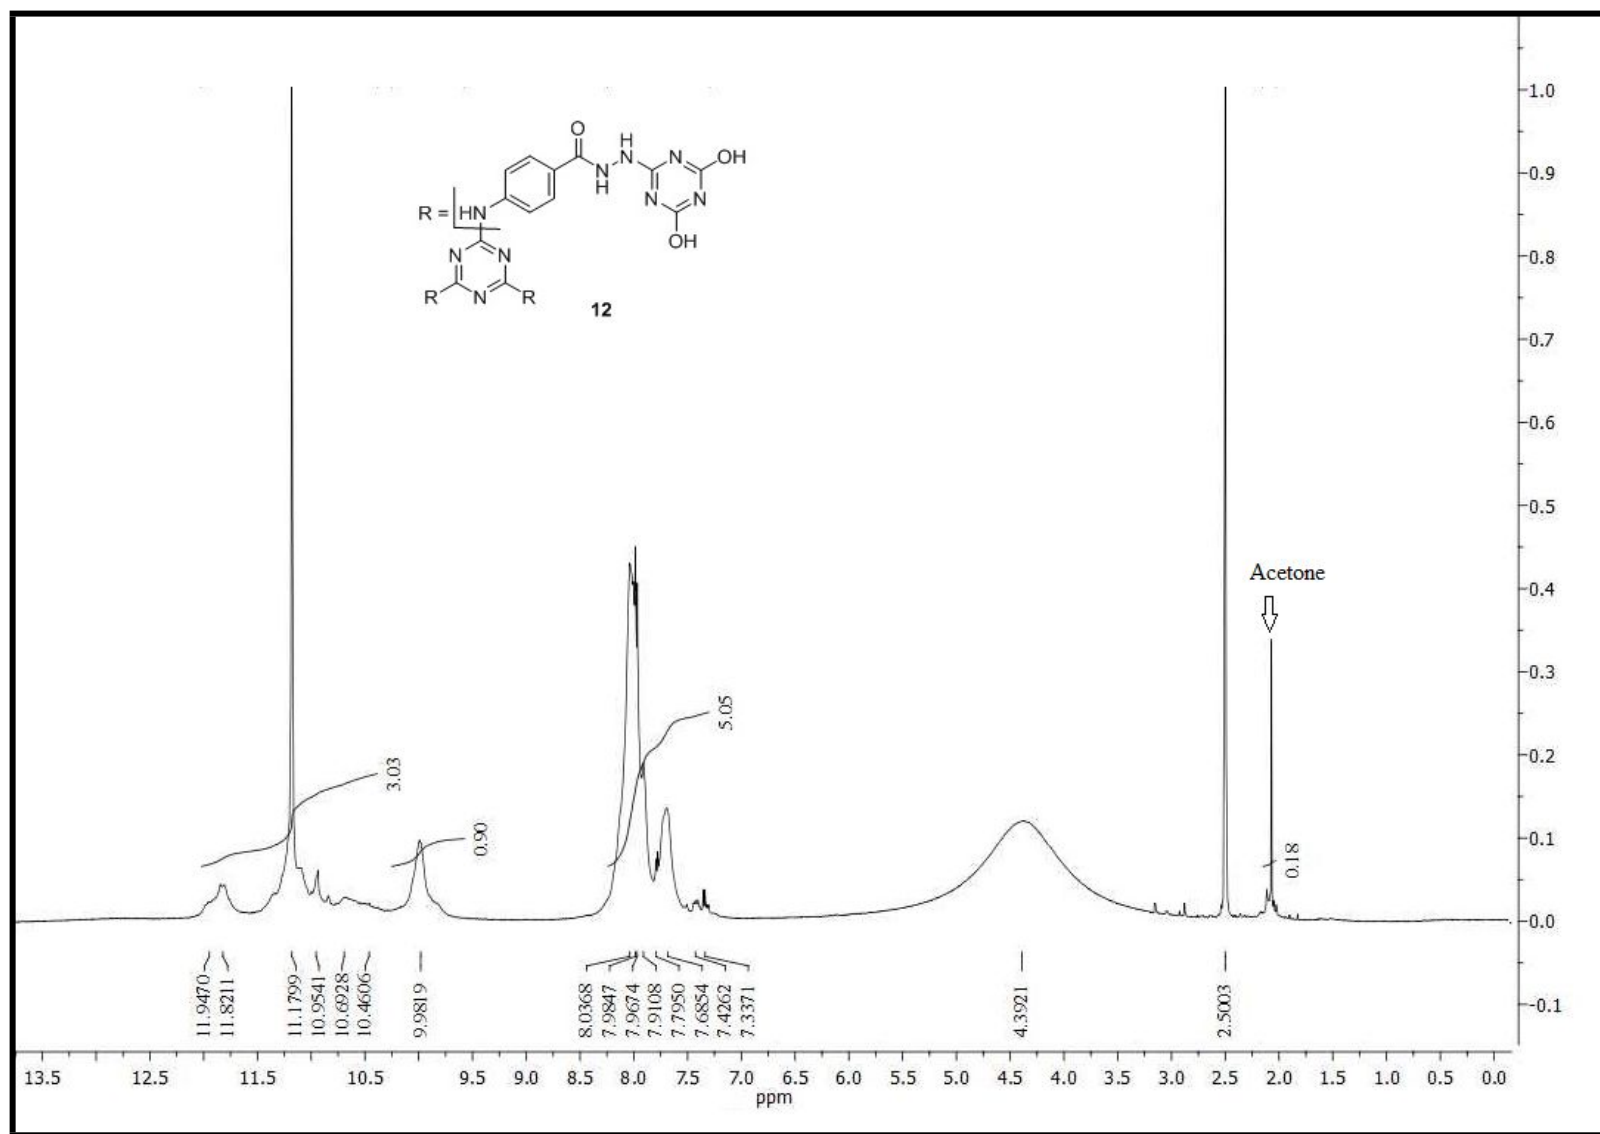

**Figure S20:**  $^1\text{H-NMR}$  ( $\text{DMSO-}d_6$ ) spectrum of 4,4',4''-((1,3,5-triazine-2,4,6-triyl)tris(azanediyl))tris(*N'*-(4,6-dihydroxy-1,3,5-triazin-2-yl)benzohydrazide)

**12**

S22

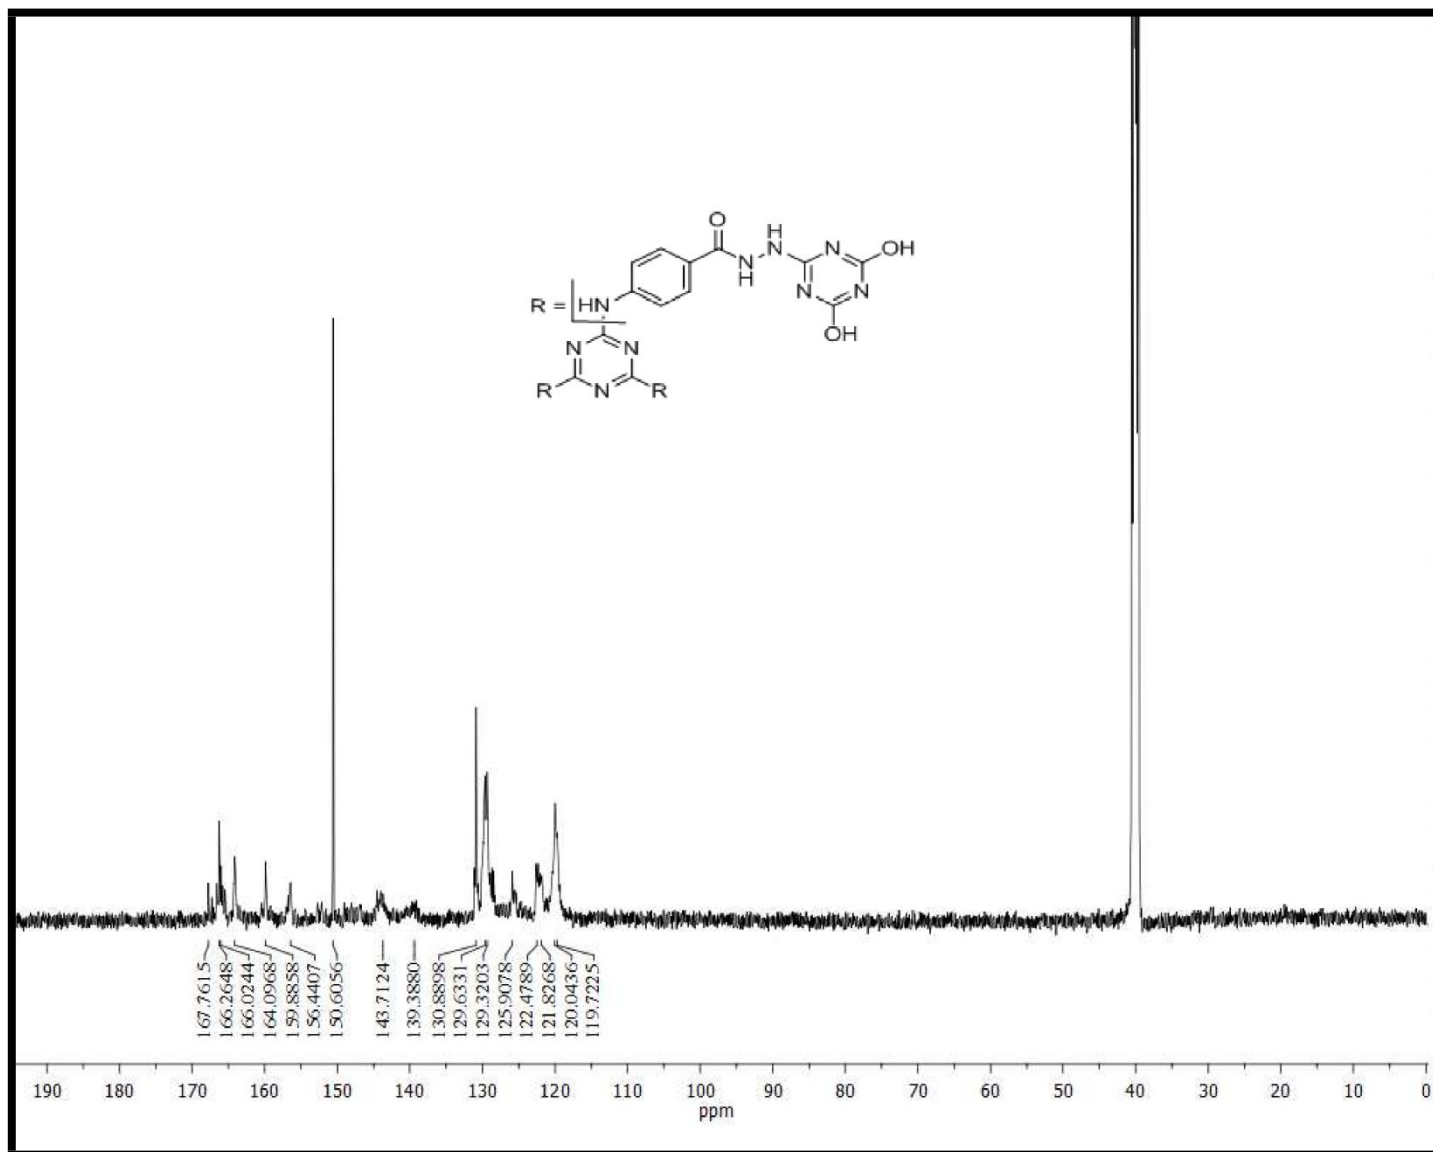

**Figure S21:**  $^{13}\text{C-NMR}$  (DMSO- $d_6$ ) spectrum of 4,4',4''-((1,3,5-triazine-2,4,6-triyl)tris(azanediyl))tris(*N'*-(4,6-dihydroxy-1,3,5-triazin-2-yl)benzohydrazide)

12

S23

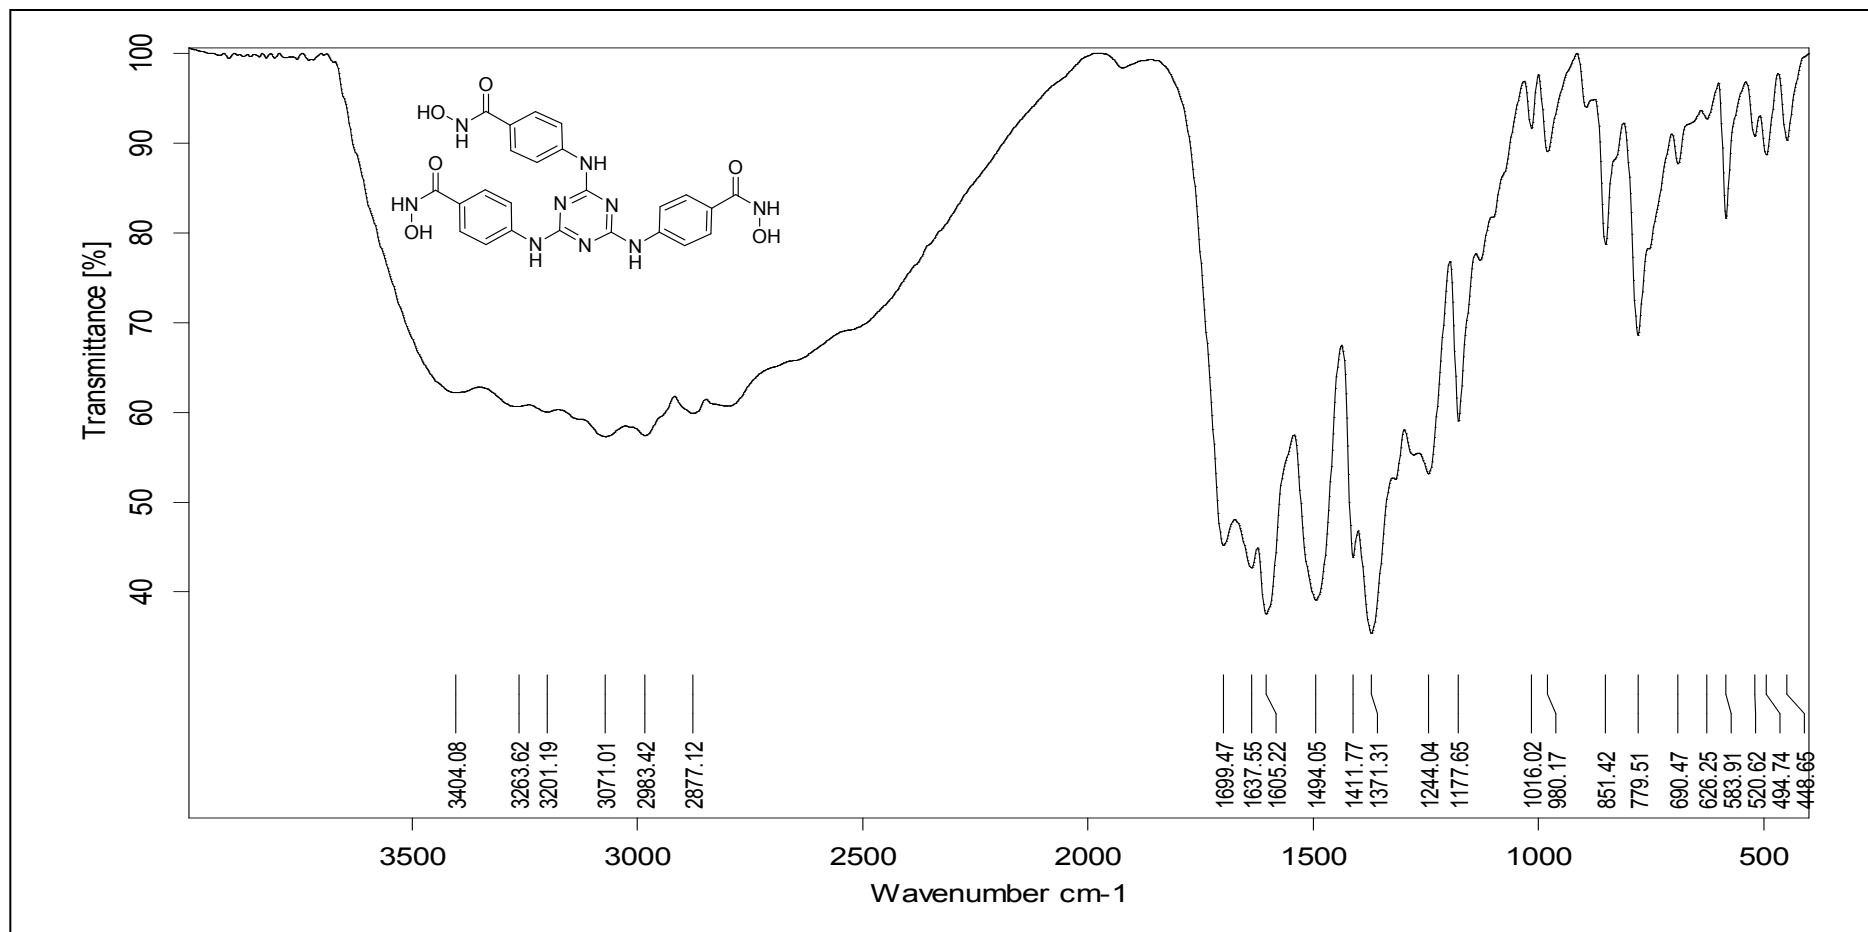

**Figure S22:** IR (KBr) spectrum of 4,4',4''-((1,3,5-triazine-2,4,6-triyl)tris(azanediyl))tris(*N*-hydroxybenzamide) **13**.



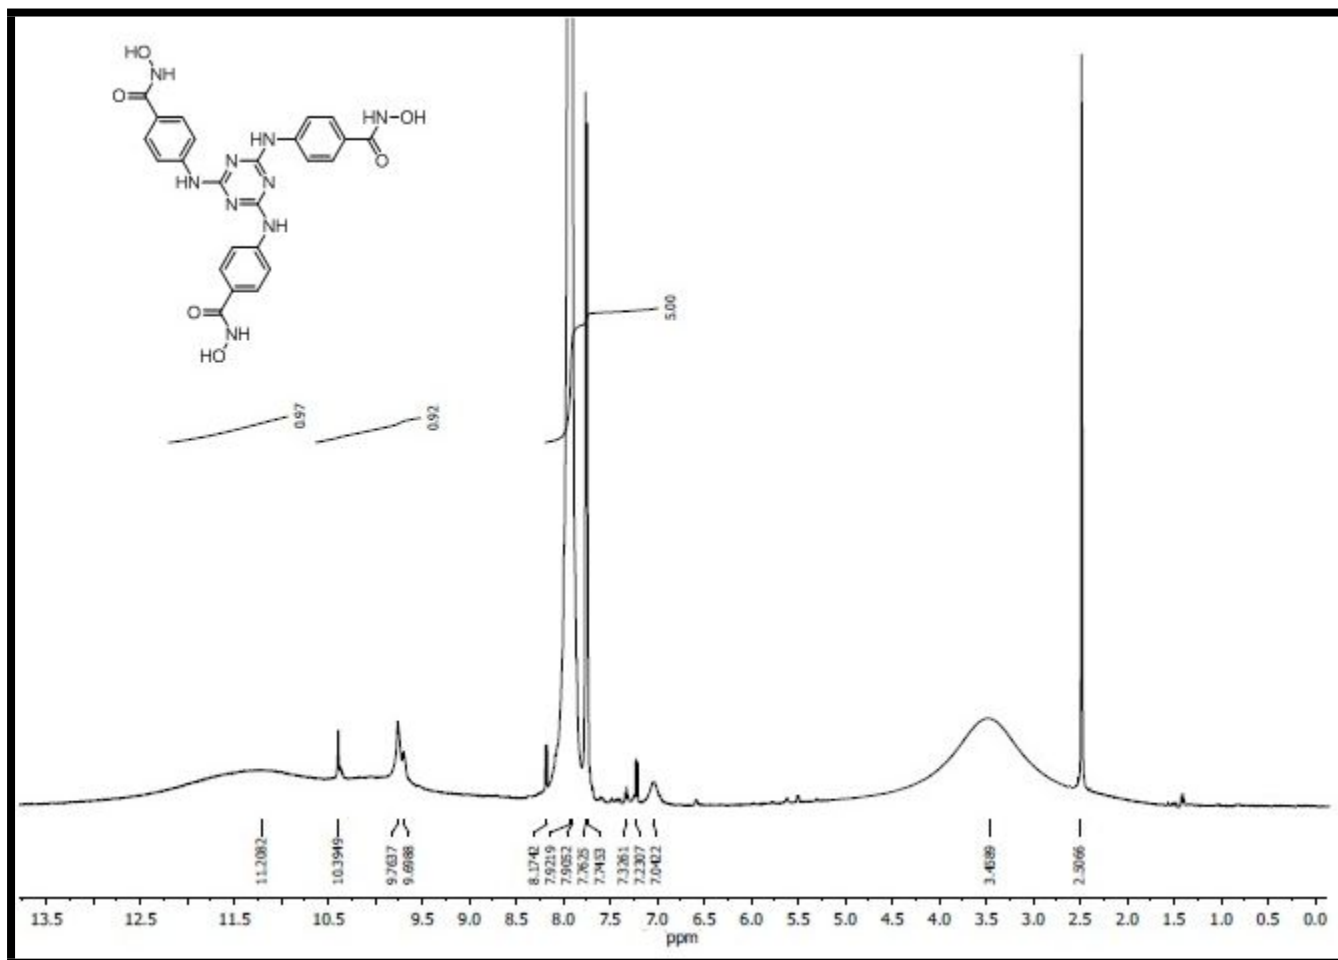

**Figure S23:** <sup>1</sup>H-NMR (DMSO-*d*<sub>6</sub>) spectrum of 4,4',4''-((1,3,5-triazine-2,4,6-triyl)tris(azanediyl))tris(*N*-hydroxybenzamide) 13.

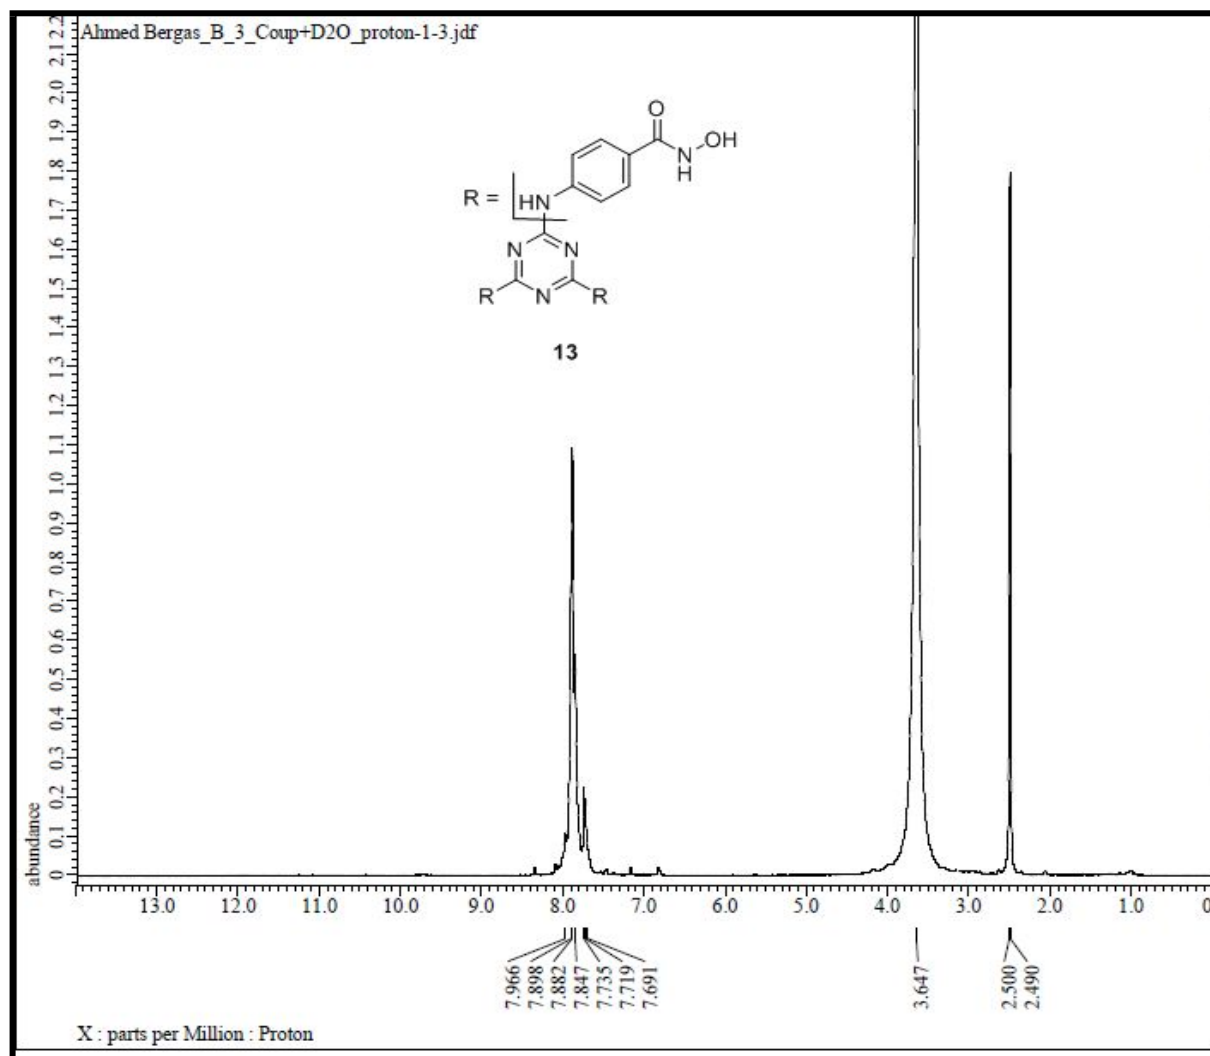

**Figure S24:**  $^1\text{H-NMR}$  ( $\text{DMSO-}d_6$ ,  $\text{D}_2\text{O}$ ) spectrum of 4,4',4''-((1,3,5-triazine-2,4,6-triyl)tris(azanediyl))tris(*N*-hydroxybenzamide) **13**.

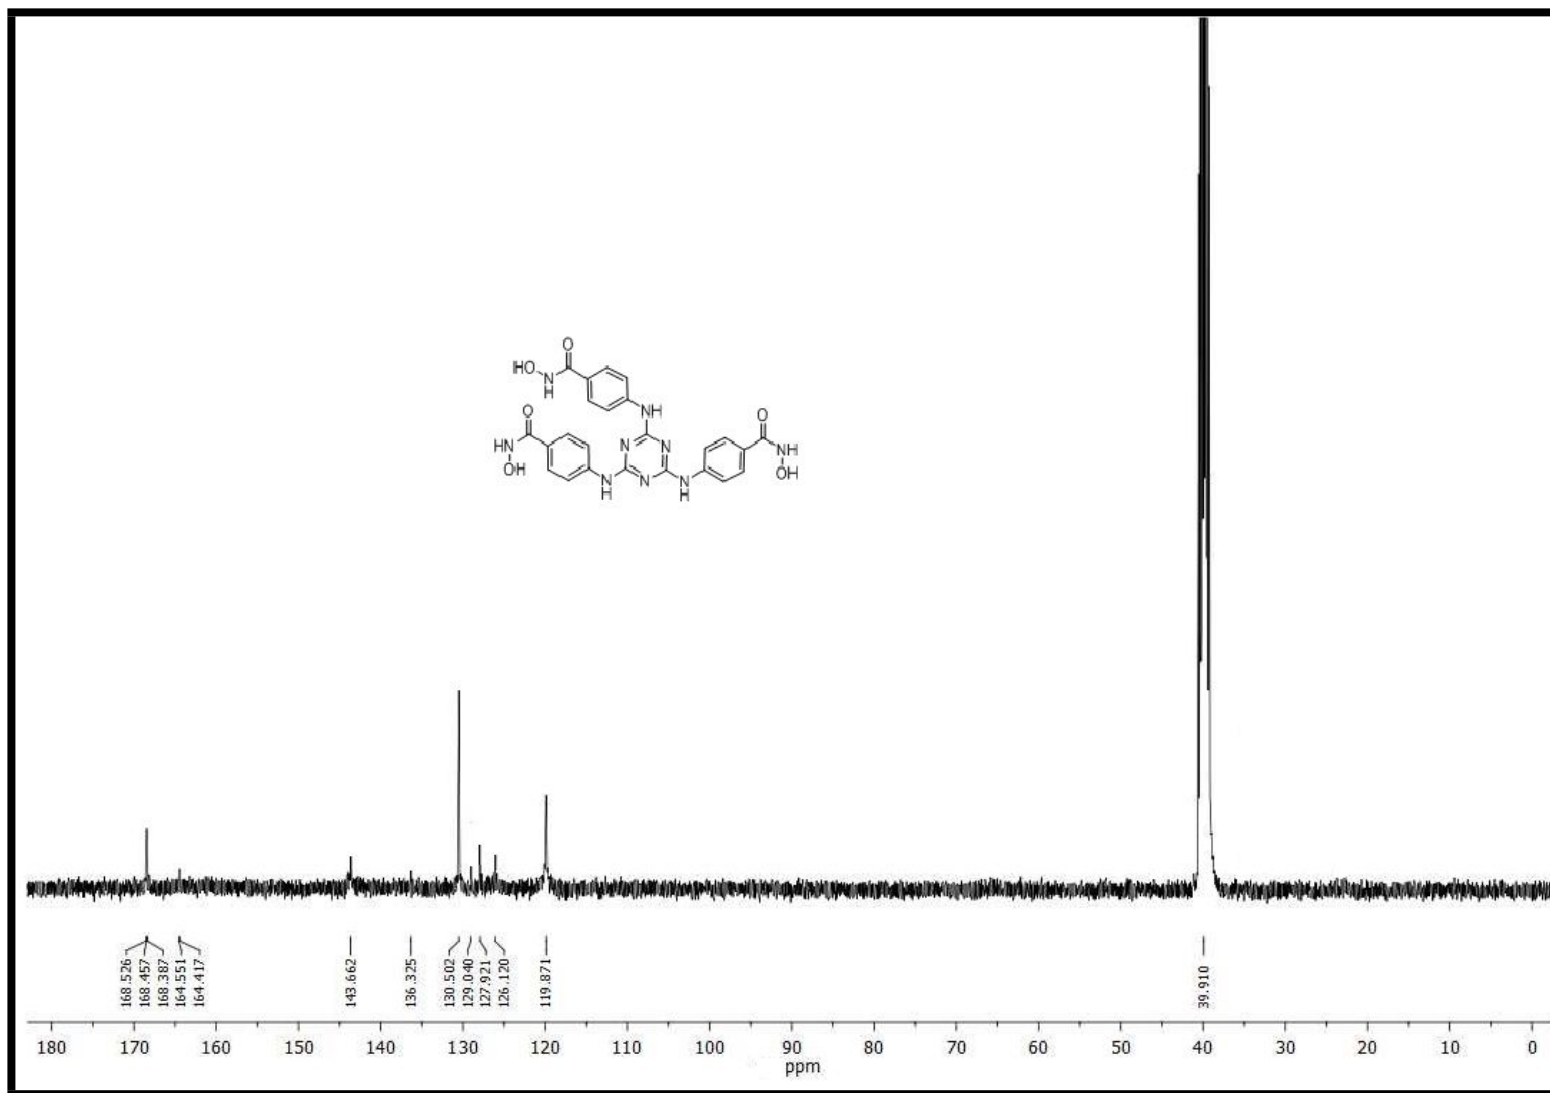

**Figure S25:**  $^{13}\text{C}$ -NMR ( $\text{DMSO-}d_6$ ) spectrum of  $4,4',4''\text{-}((1,3,5\text{-triazine-}2,4,6\text{-triy})\text{tris(azanediyl)})\text{tris}(N\text{-hydroxybenzamide})$  **13**.

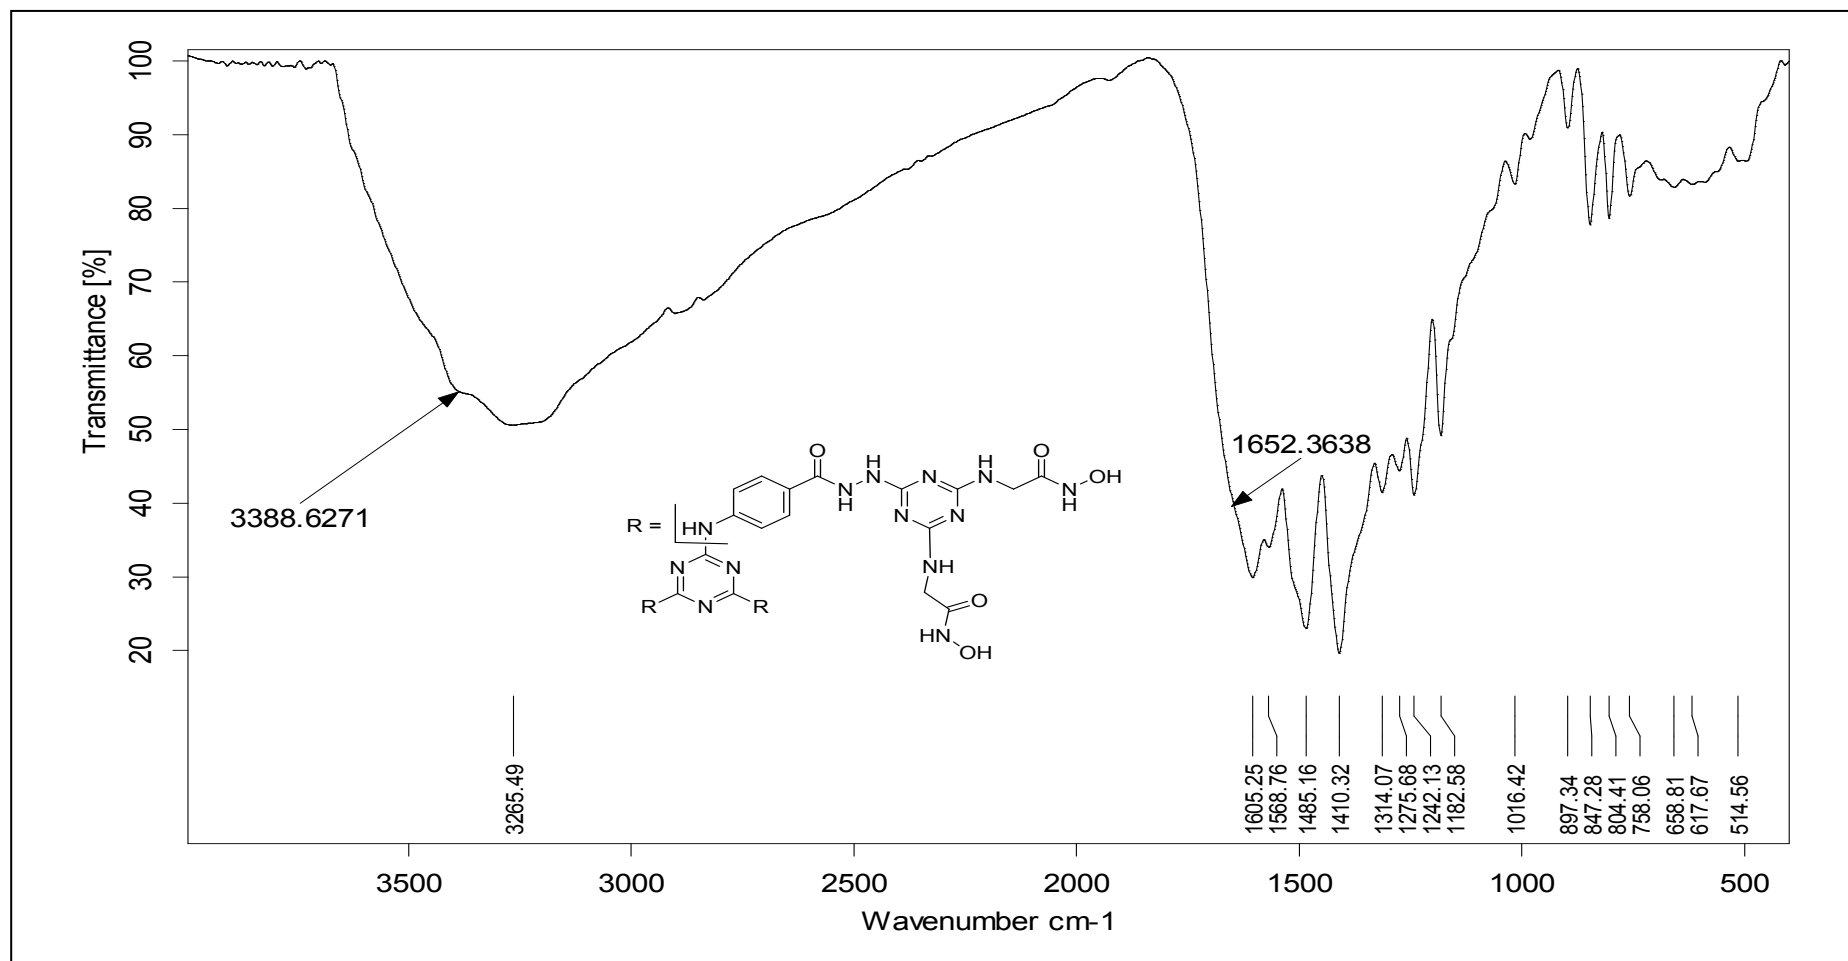

**Figure S26:** IR (KBr) spectrum of 2,2',2'',2''',2''''-((6,6',6''-(2,2',2''-(4,4',4''-((1,3,5-triazine-2,4,6-triyl)tris(azanediyl))tris(benzoyl))tris(hydrazine-2,1-diyl))tris(1,3,5-triazine-6,4,2-triyl))hexakis(azanediyl))hexakis(*N*-hydroxyacetamide) **14a**.

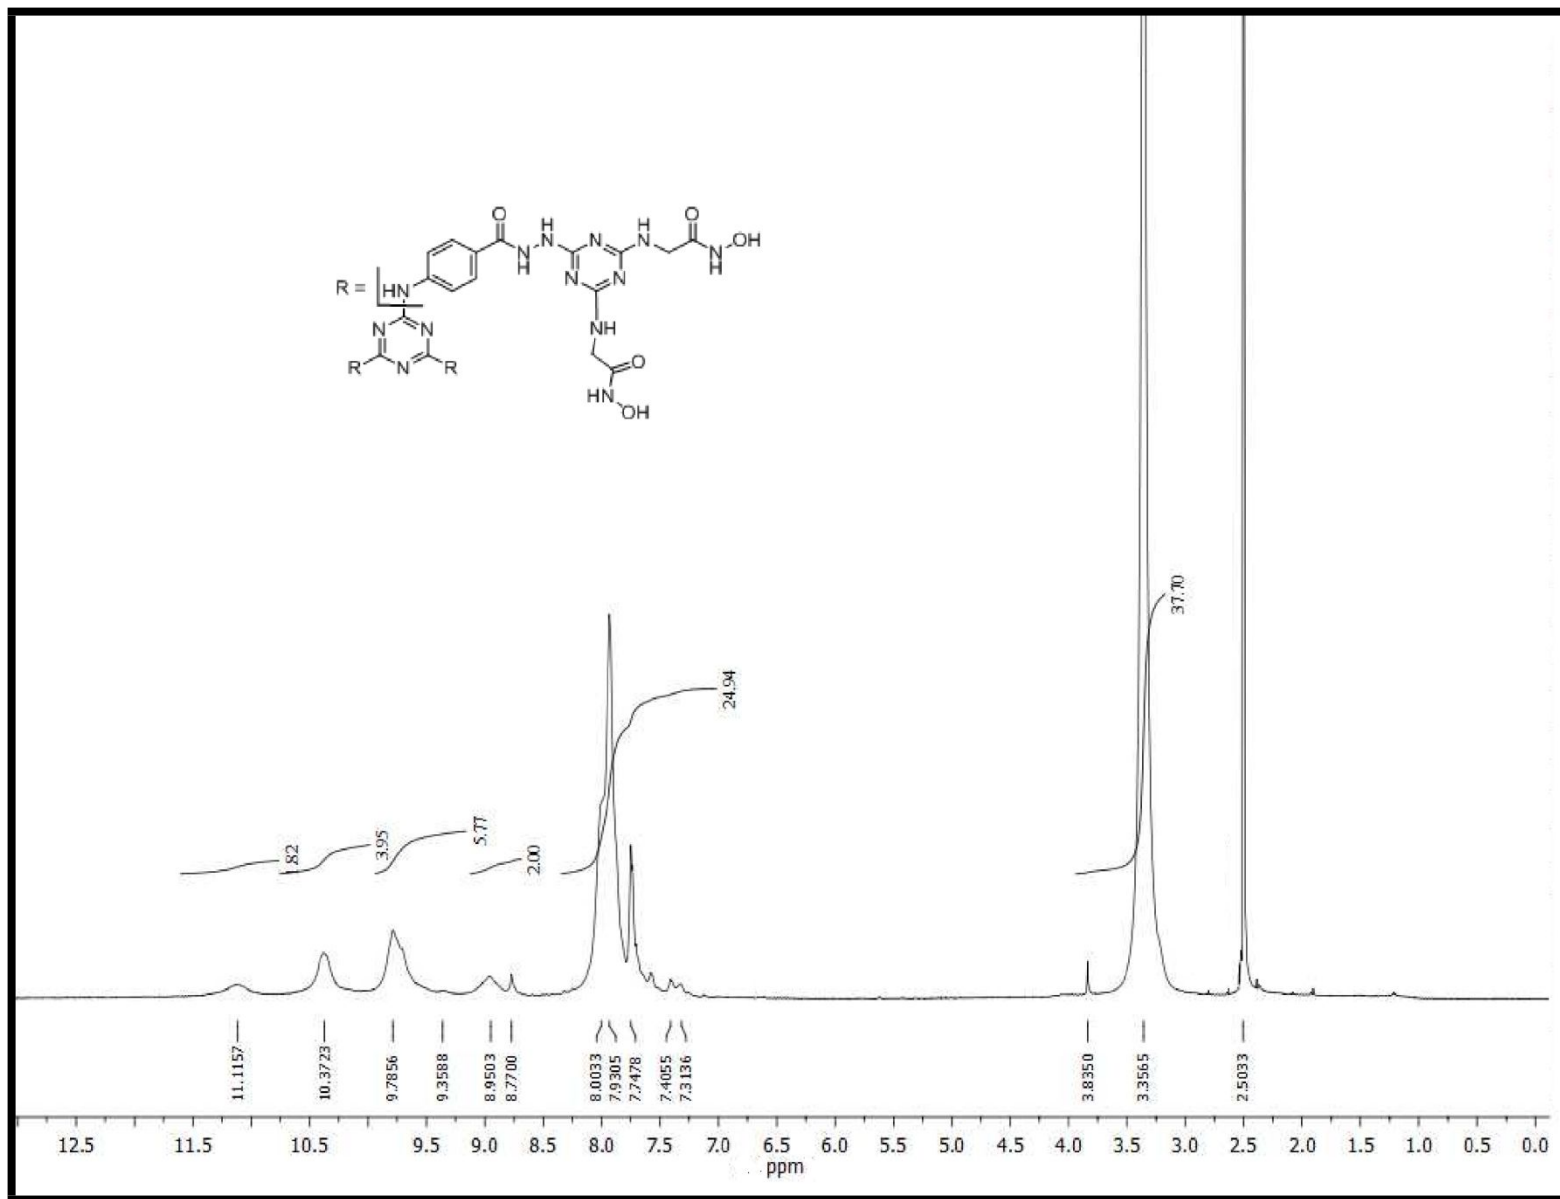

**Figure S27:** <sup>1</sup>H-NMR (DMSO-*d*<sub>6</sub>) spectrum of 2,2',2'',2''',2''''-(6,6',6''-(2,2',2''-(4,4',4''-(1,3,5-triazine-2,4,6-triyl)tris(azanediyl))tris(benzoyl))tris(hydrazine-2,1-diyl))tris(1,3,5-triazine-6,4,2-triyl))hexakis(azanediyl))hexakis(*N*-hydroxyacetamide) **14a**.

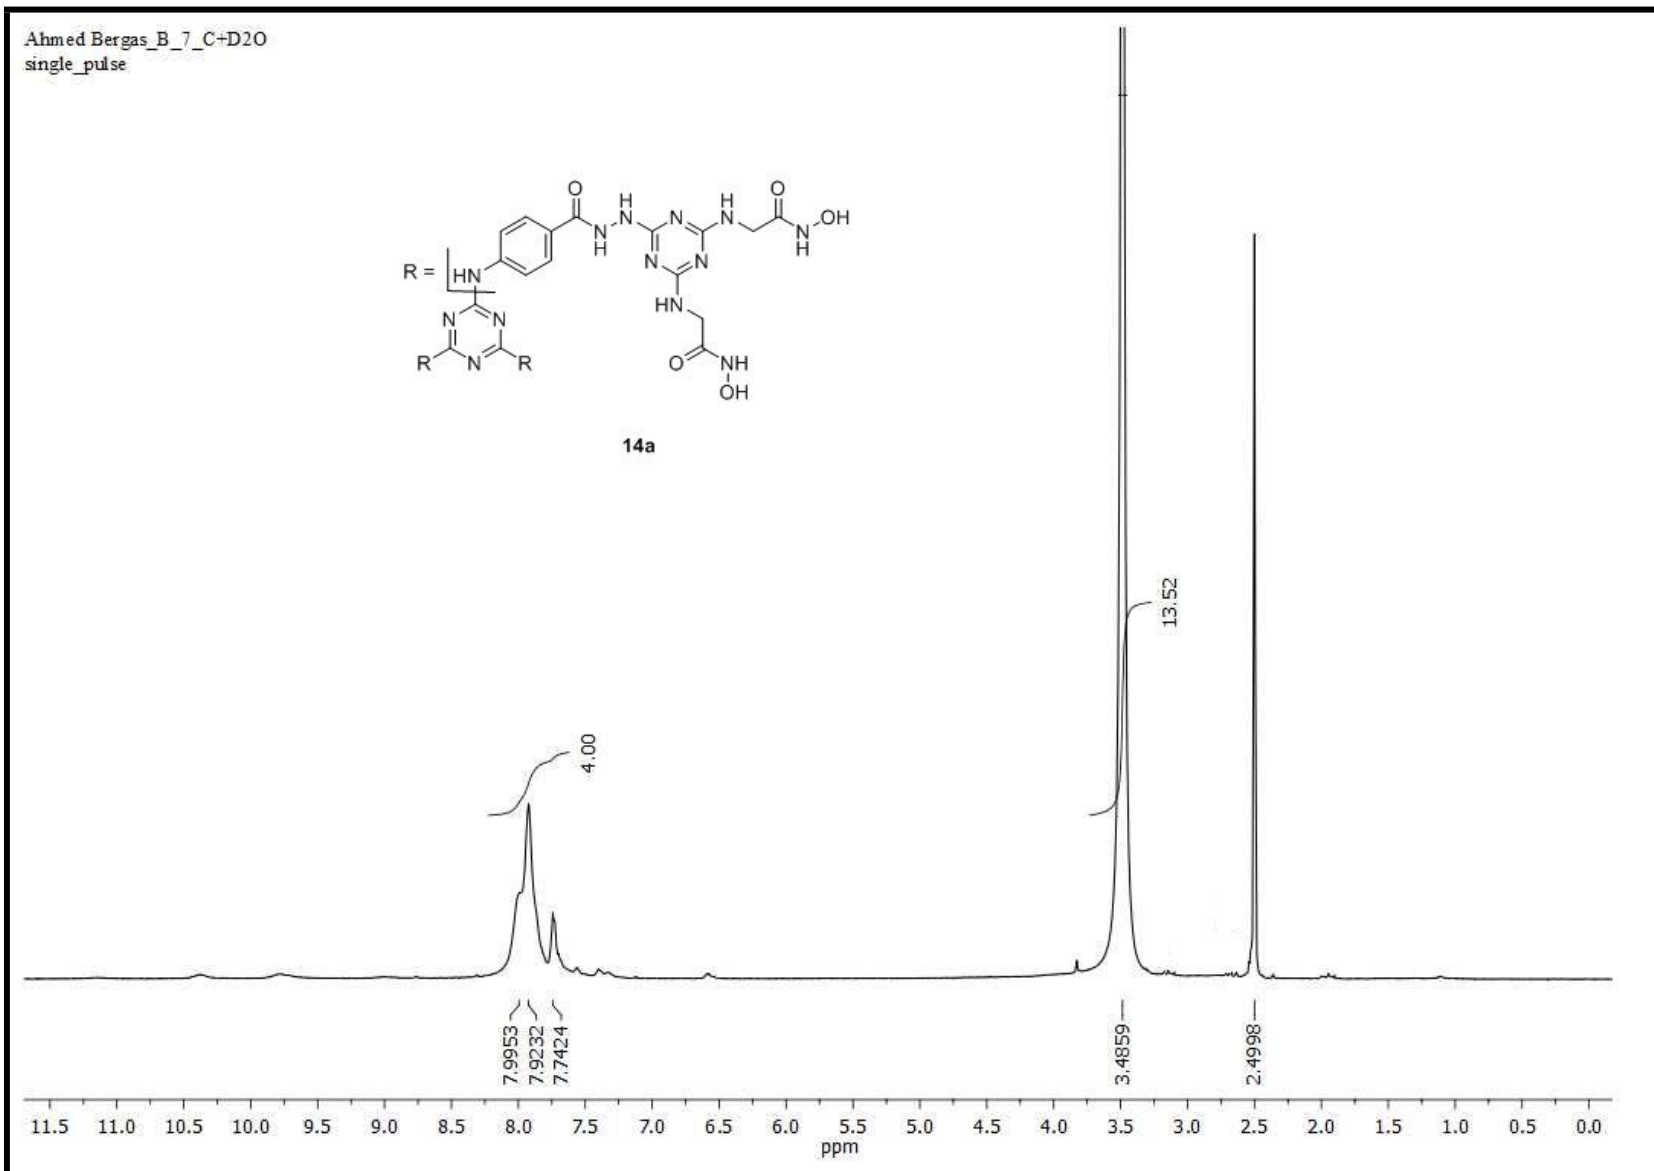

**Figure S28:** <sup>1</sup>H-NMR (DMSO-*d*<sub>6</sub>, D<sub>2</sub>O) spectrum of 2,2',2'',2''',2''''',2''''''-((6,6',6''-(2,2',2''-(4,4',4''-((1,3,5-triazine-2,4,6-triyl)tris(azanediyl))tris(benzoyl))tris(hydrazine-2,1-diyl))tris(1,3,5-triazine-6,4,2-triyl))hexakis(azanediyl))hexakis(*N*-hydroxyacetamide) **14a**.

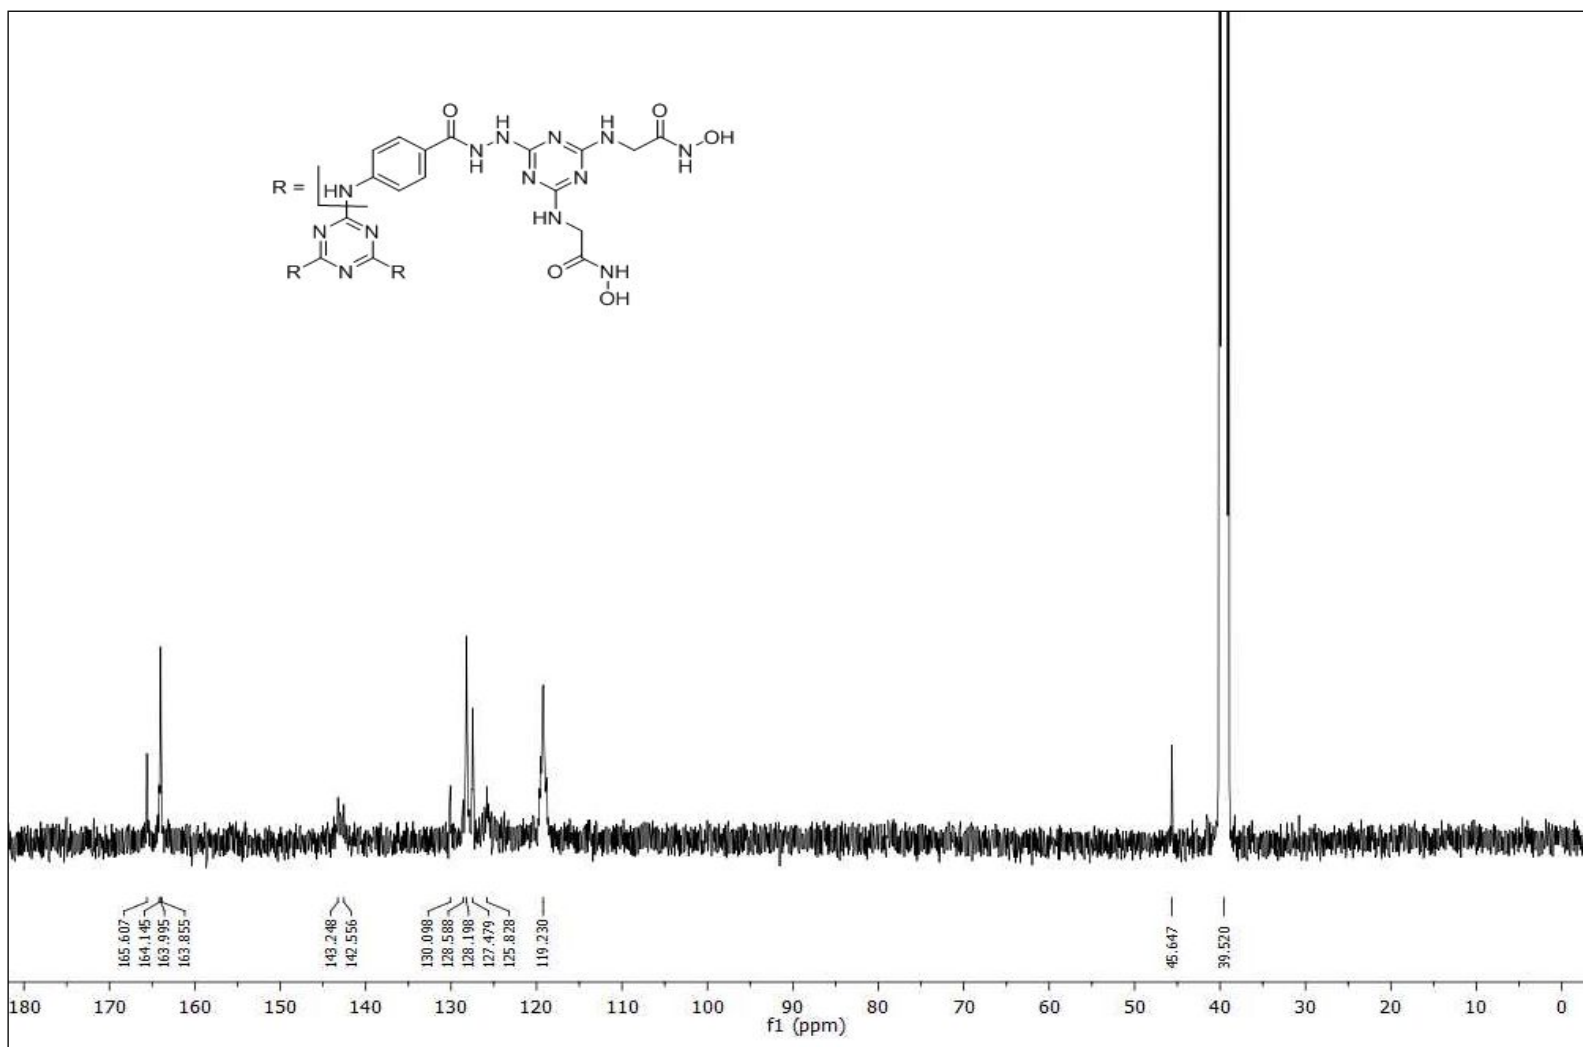

**Figure S29:**  $^{13}\text{C-NMR}$  (DMSO- $d_6$ ) spectrum of 2,2',2'',2''',2''''-(((6,6',6''-(2,2',2''-(4,4',4''-((1,3,5-triazine-2,4,6-triyl)tris(azanediyl))tris(benzoyl))tris(hydrazine-2,1-diyl))tris(1,3,5-triazine-6,4,2-triyl))hexakis(azanediyl))hexakis(*N*-hydroxyacetamide) **14a**.

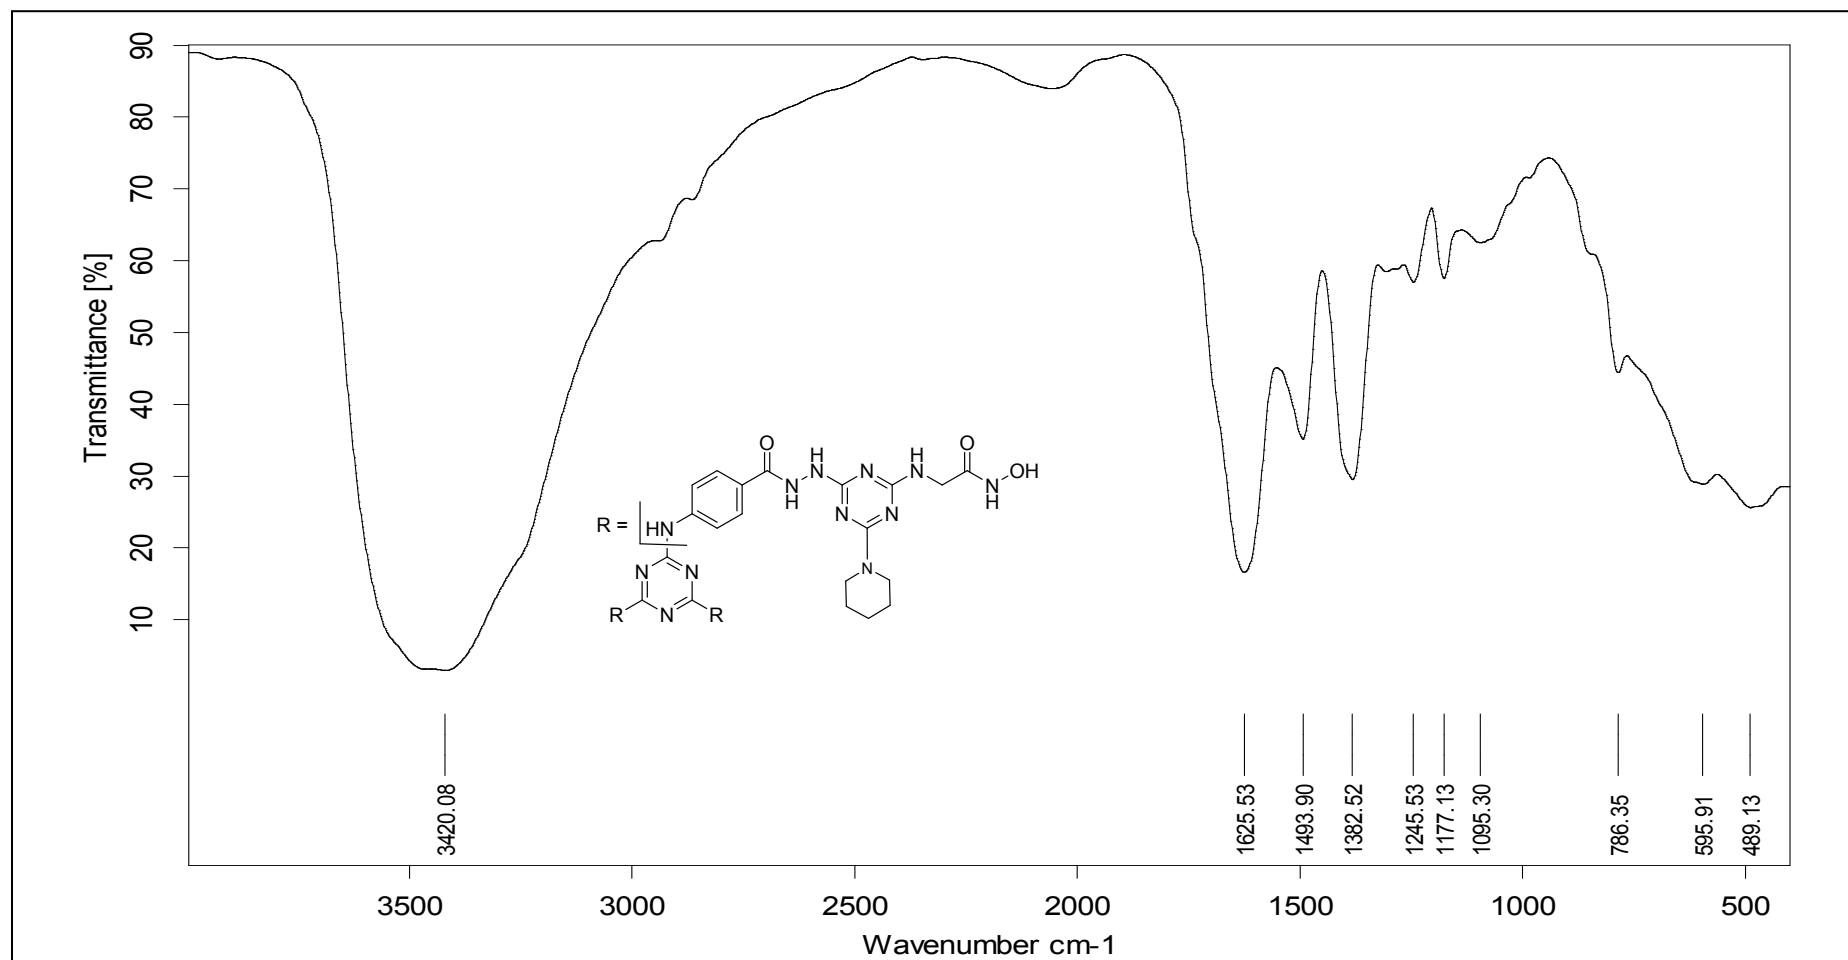

**Figure S30:** IR (KBr) spectrum of 2,2',2''-((6,6',6''-(2,2',2''-(4,4',4''-((1,3,5-triazine-2,4,6-triyl)tris(azanediyl))tris(benzoyl))tris(hydrazine-2,1-diyl))tris(4-(piperidin-1-yl)-1,3,5-triazine-6,2-diyl))tris(azanediyl))tris(*N*-hydroxyacetamide) **14b**.



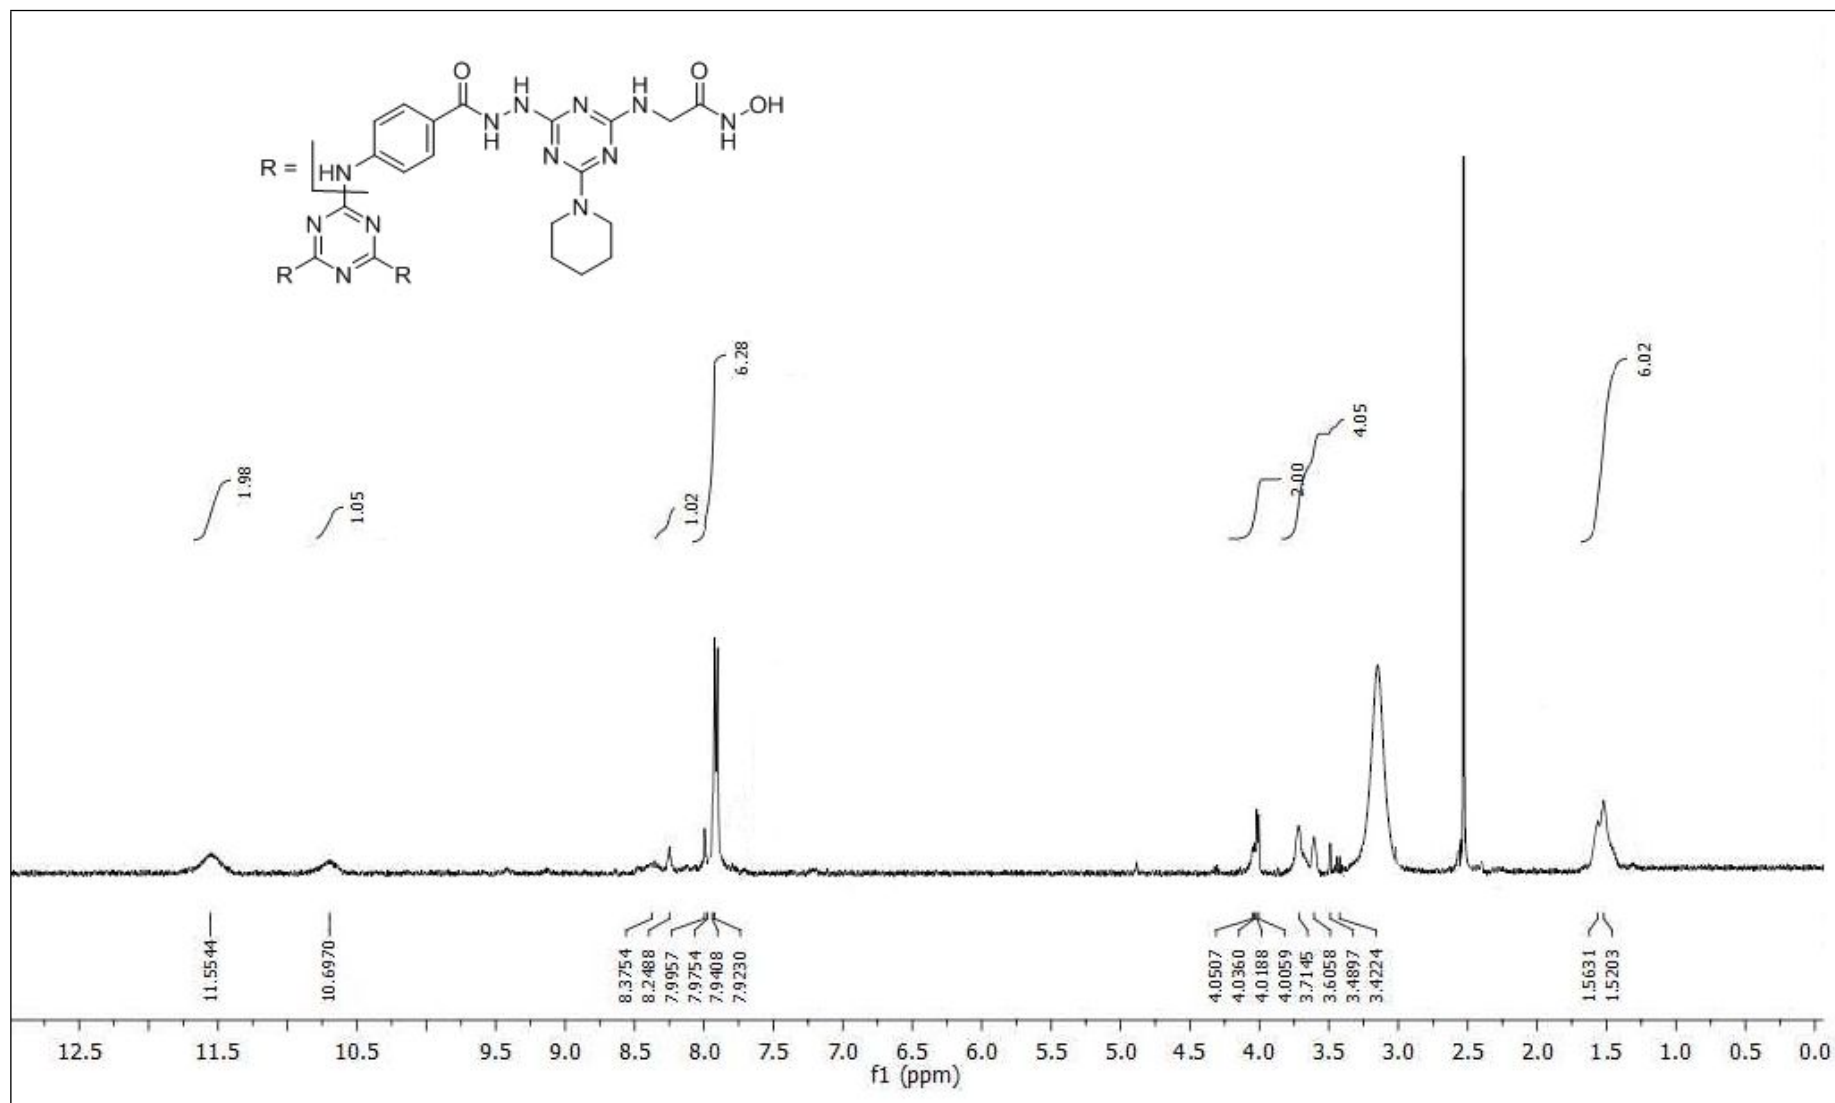

**Figure S31:**  $^1\text{H-NMR}$  (DMSO- $d_6$ ) spectrum of 2,2',2''-((6,6',6''-(2,2',2''-(4,4',4''-(1,3,5-triazine-2,4,6-triyl)tris(azanediyl))tris(benzoyl))tris(hydrazine-2,1-diyl))tris(4-(piperidin-1-yl)-1,3,5-triazine-6,2-diyl))tris(azanediyl))tris(*N*-hydroxyacetamide) **14b**.

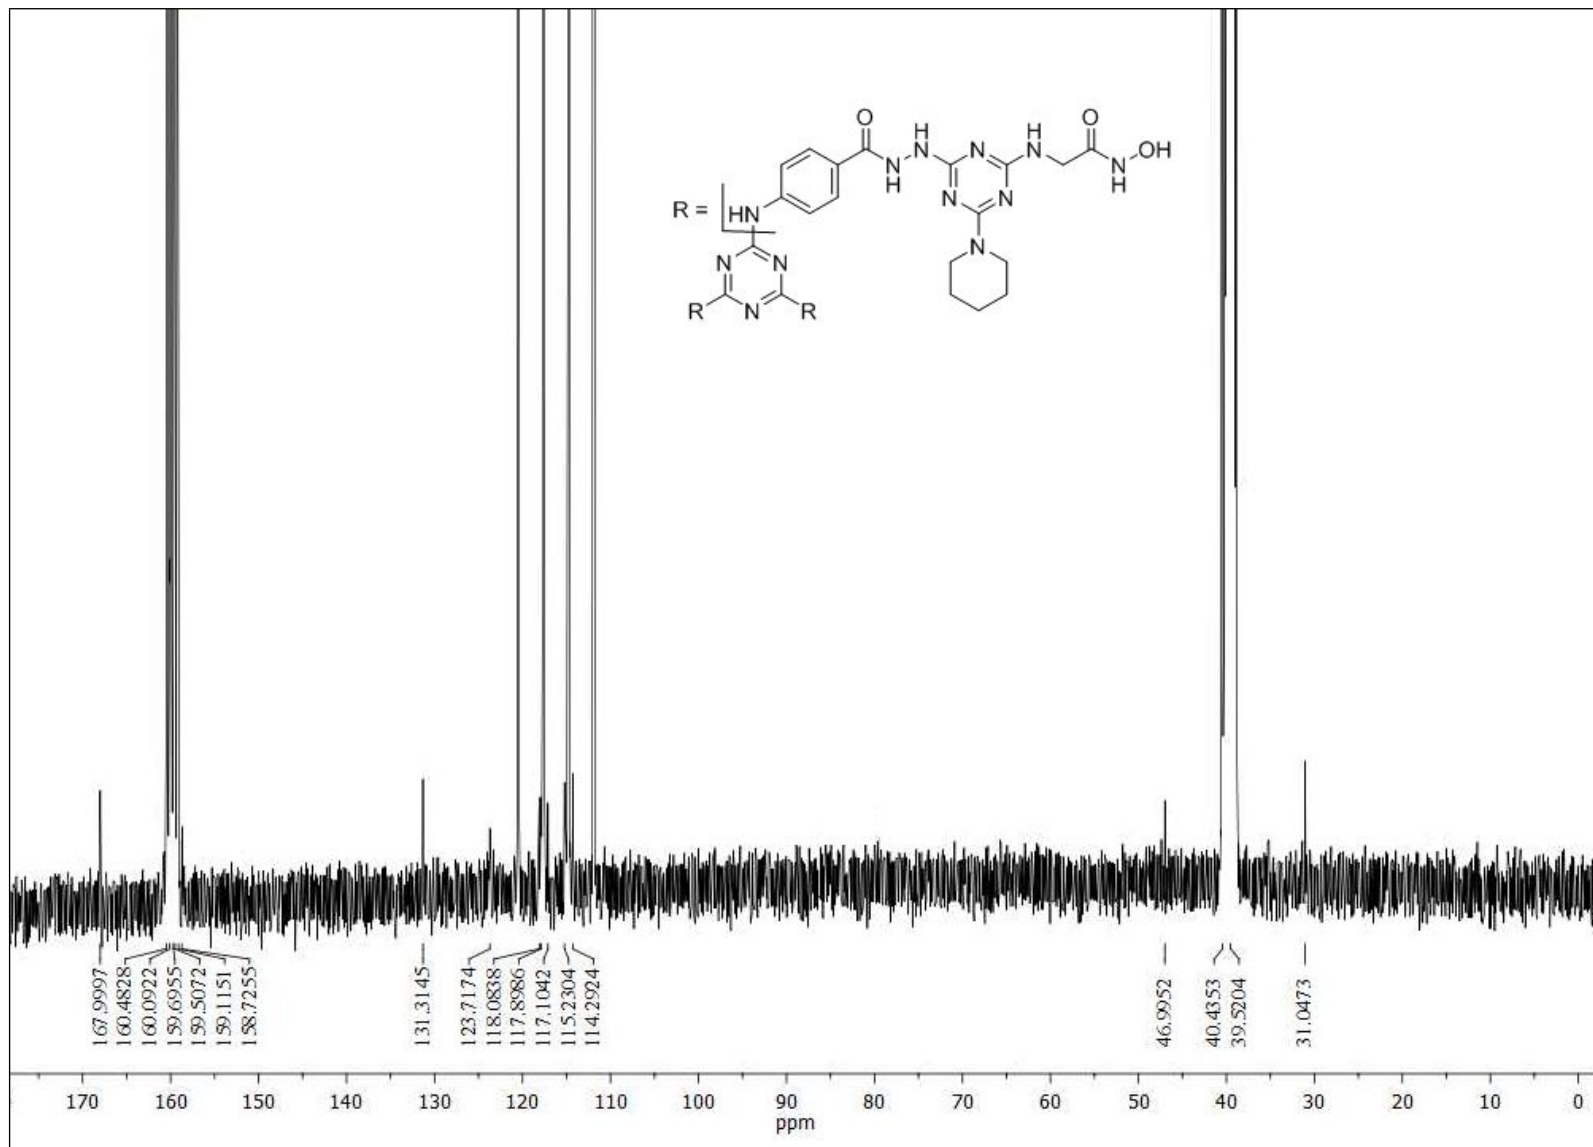

**Figure S32:** <sup>13</sup>C-NMR (DMSO-*d*<sub>6</sub>, TFA) spectrum of 2,2',2''-((6,6',6''-(2,2',2''-(4,4',4''-((1,3,5-triazine-2,4,6-triyl)tris(azanediyl))tris(benzoyl))tris(hydrazine-2,1-diyl))tris(4-(piperidin-1-yl)-1,3,5-triazine-6,2-diyl))tris(azanediyl))tris (*N*-hydroxyacetamide) **14b**.

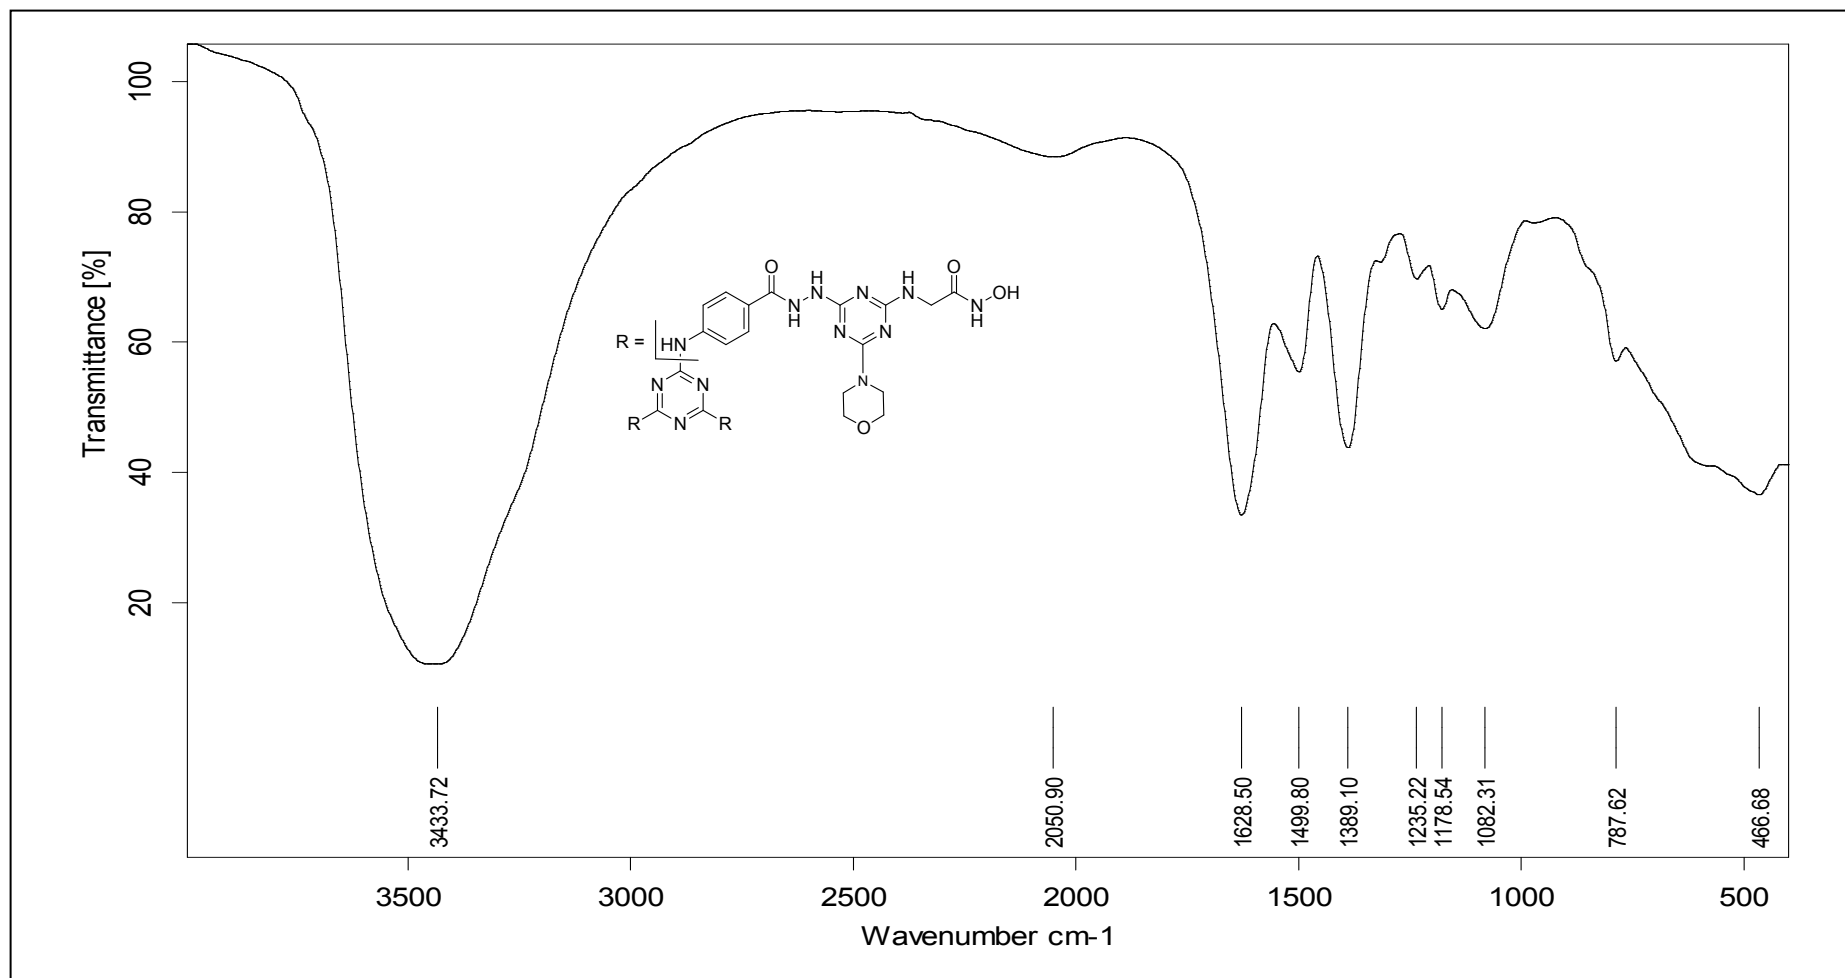

**Figure S33:** IR (KBr) spectrum of 2,2',2''-((6,6',6''-(2,2',2''-(4,4',4''-((1,3,5-triazine-2,4,6-triyl)tris(azanediyl))tris(benzoyl))tris(hydrazine-2,1-diyl))tris(4-(morpholin-4-yl)-1,3,5-triazine-6,2-diyl))tris(azanediyl))tris(*N*-hydroxyacetamide) **14c**.

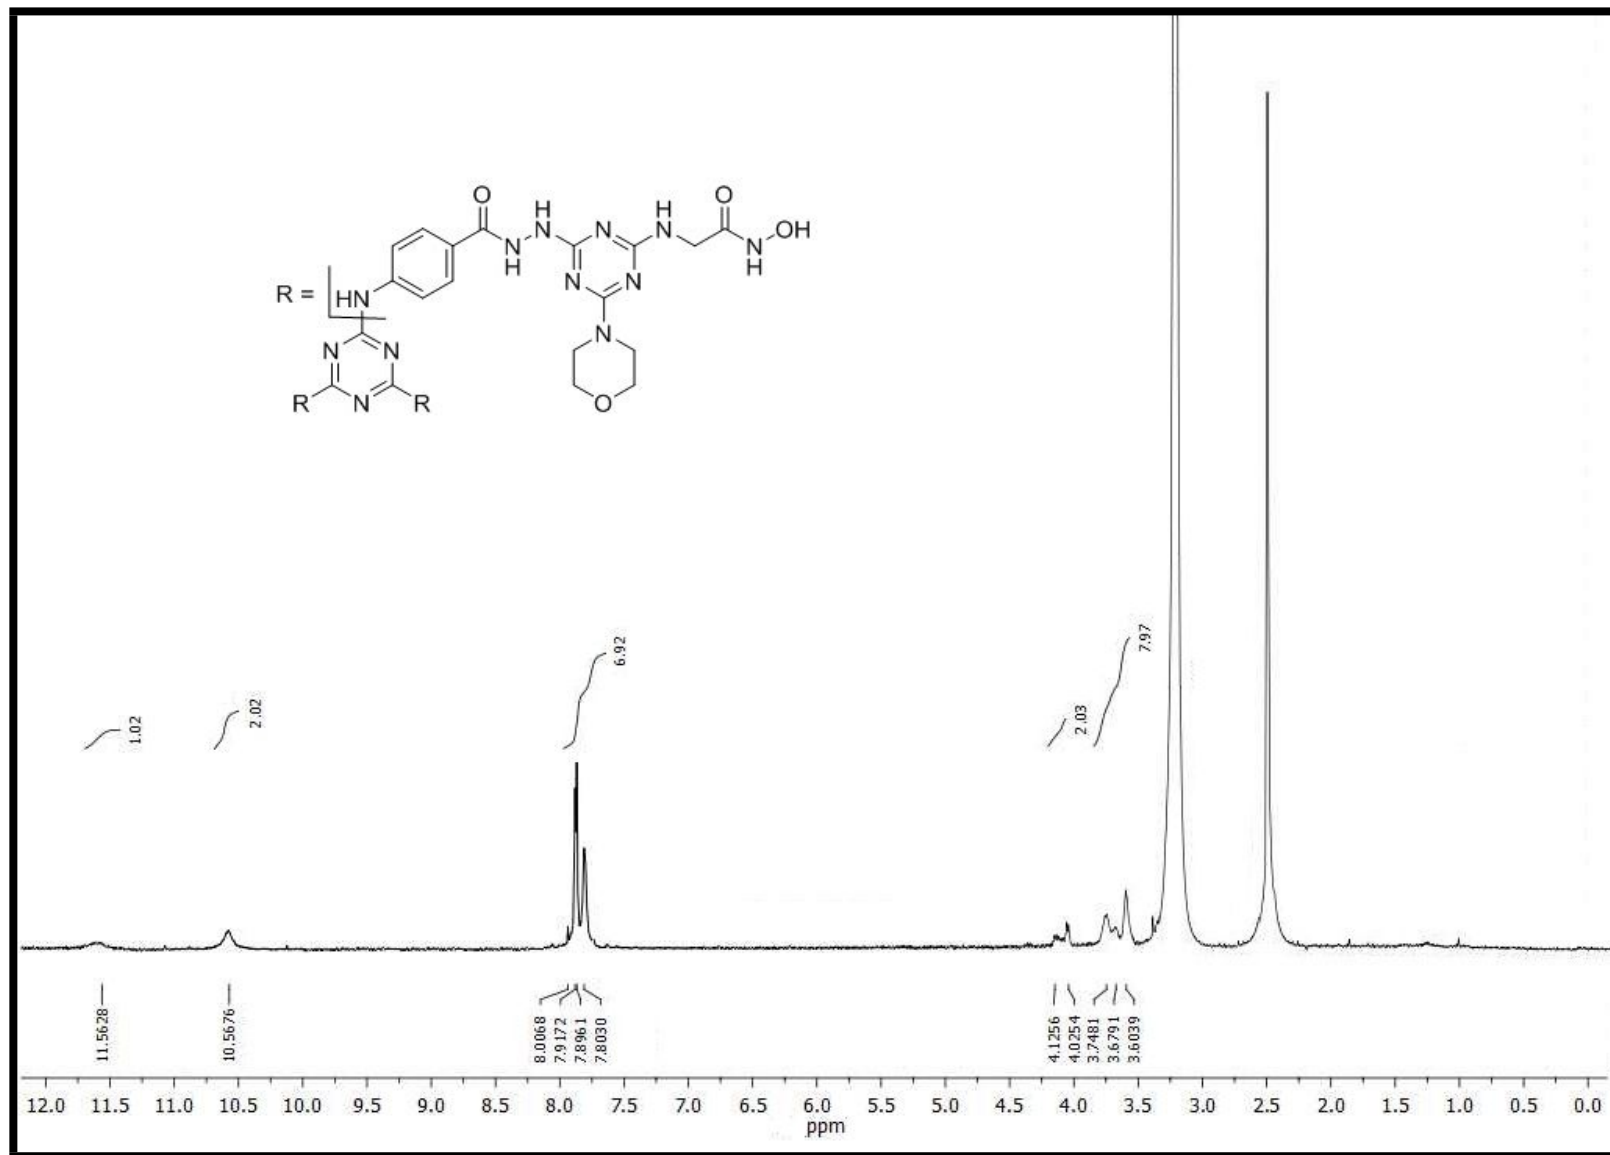

**Figure S34**  $^1\text{H-NMR}$  ( $\text{DMSO-}d_6$ ) spectrum of 2,2',2''-((6,6',6''-(2,2',2''-(4,4',4''-(1,3,5-triazine-2,4,6-triyl)tris(azanediyl))tris(benzoyl))tris(hydrazine-2,1-diyl))tris(4-(morpholin-4-yl)-1,3,5-triazine-6,2-diyl))tris(azanediyl))tris(*N*-hydroxyacetamide) **14c**.

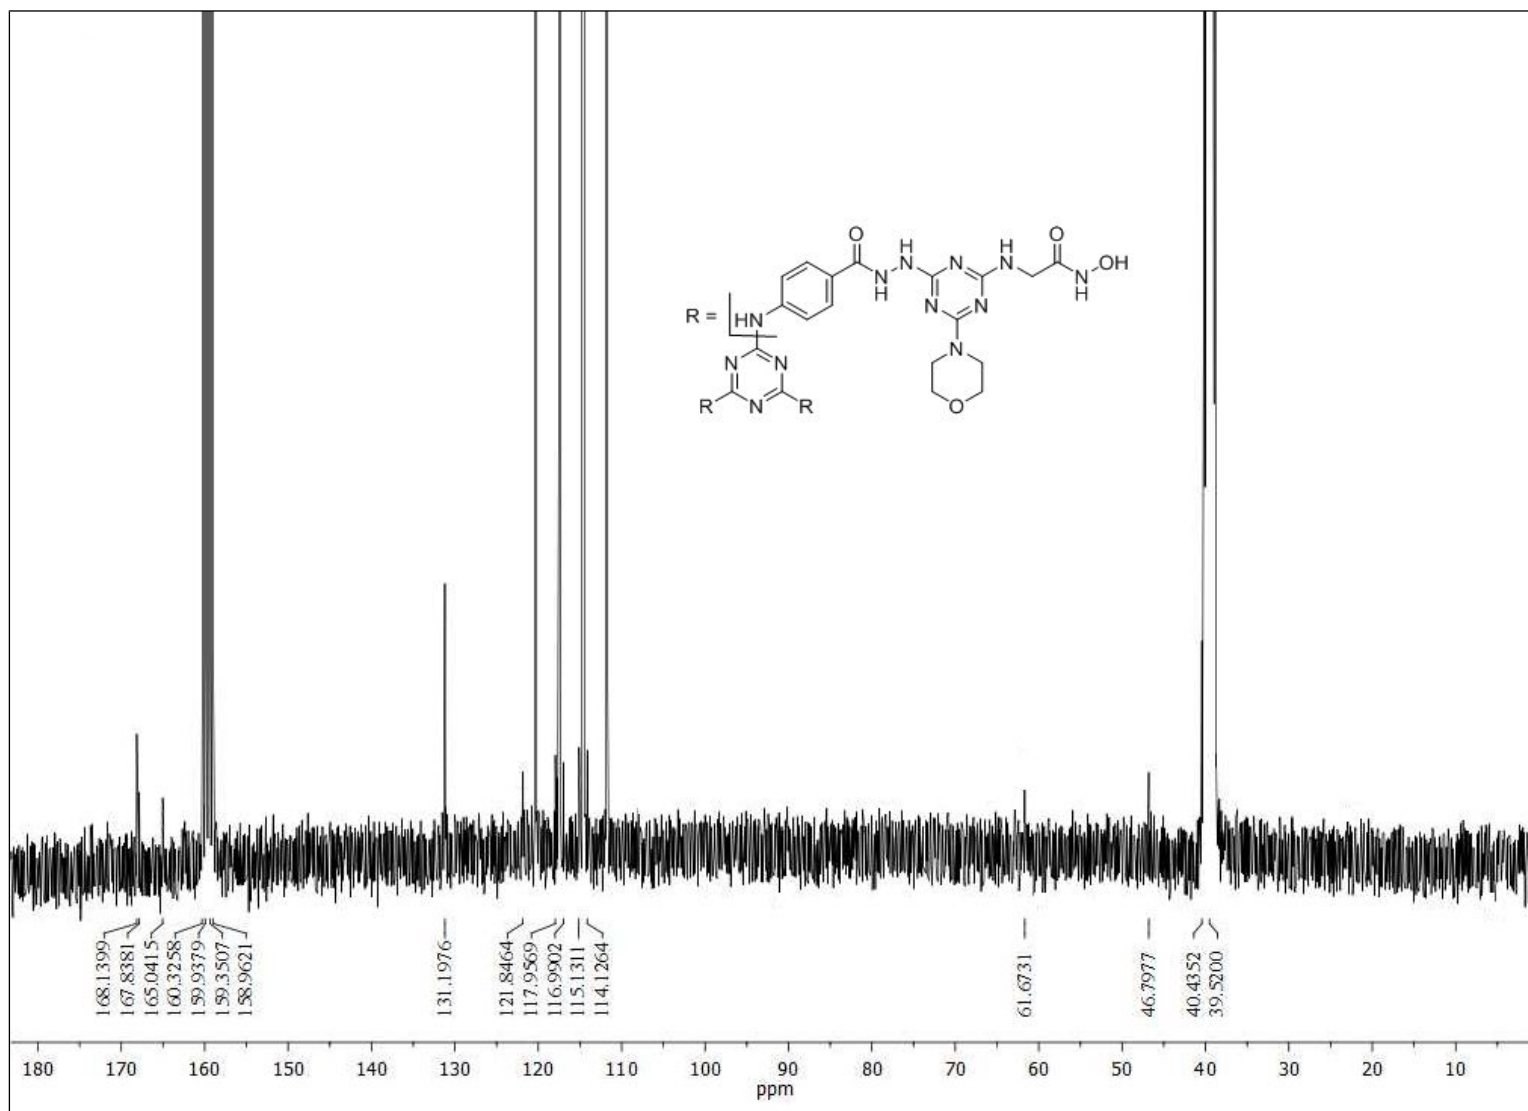

**Figure S35:** <sup>13</sup>C-NMR (DMSO-*d*<sub>6</sub>, TFA) spectrum of 2,2',2''-((6,6',6''-(2,2',2''-(4,4',4''-((1,3,5-triazine-2,4,6-triyl)tris(azanediyl))tris(benzoyl))tris(hydrazine-2,1-diyl))tris(4-(morpholin-4-yl)-1,3,5-triazine-6,2-diyl))tris(azanediyl))tris(*N*-hydroxyacetamide) **14c**.

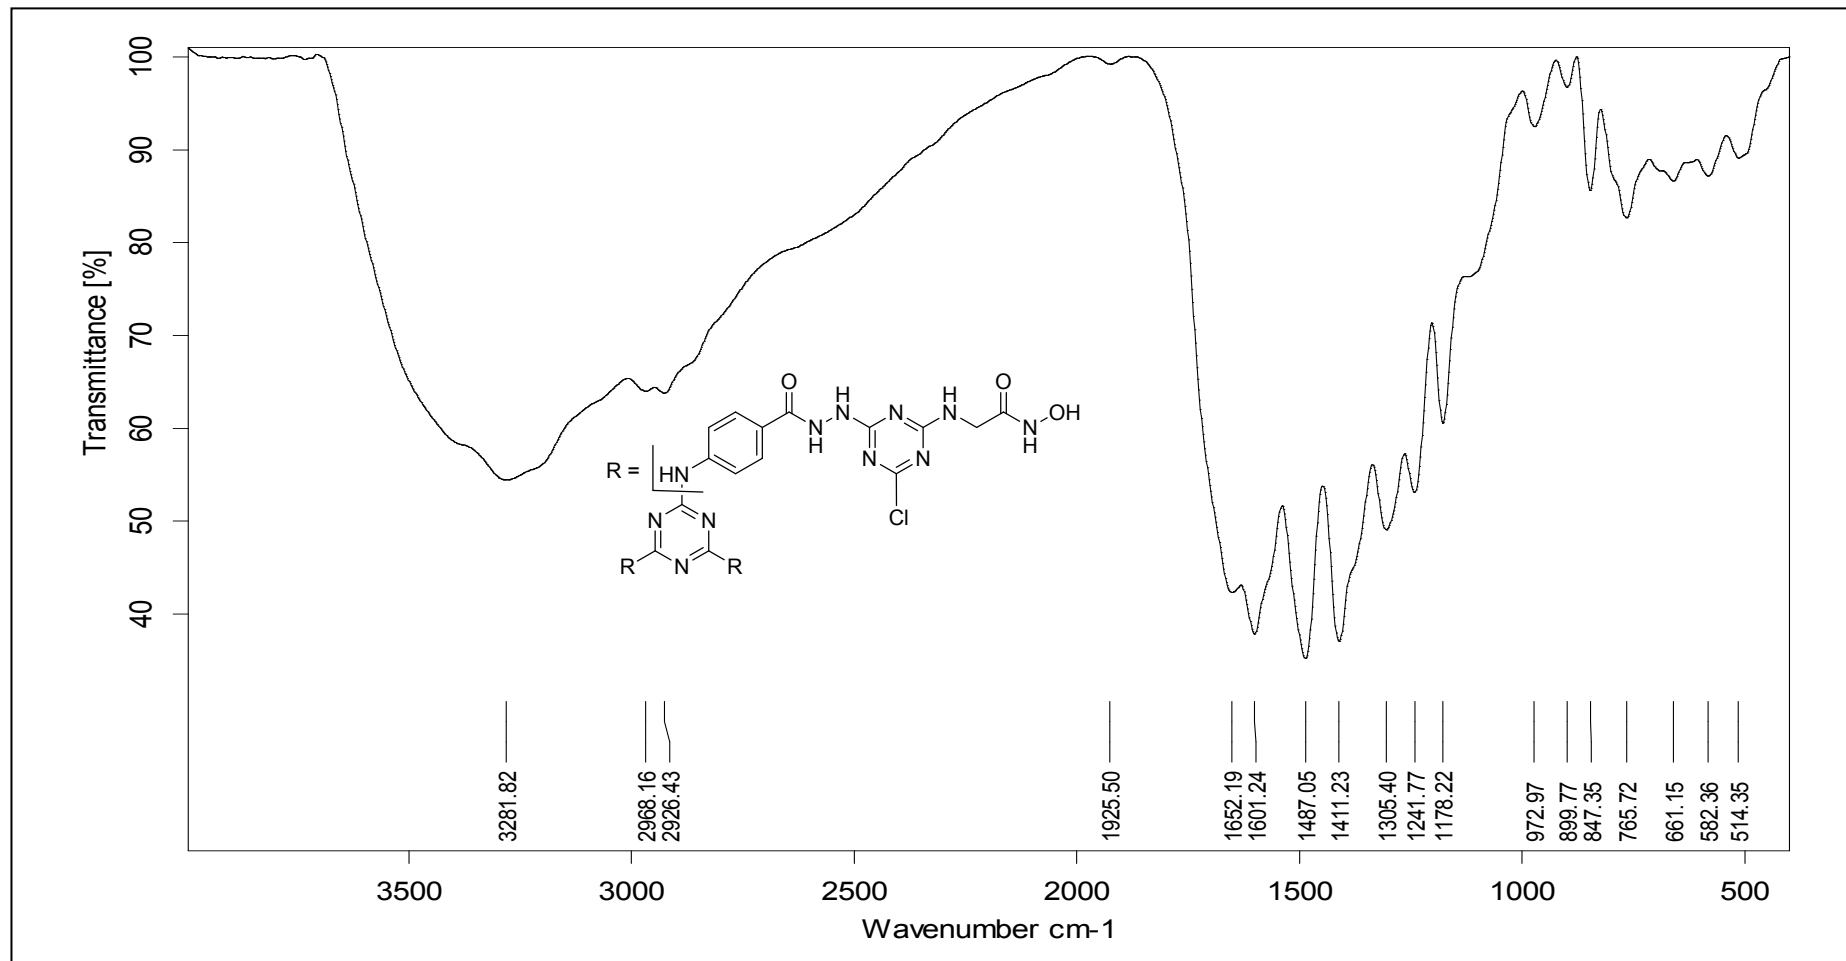

**Figure S36:** IR (KBr) spectrum of 2,2',2''-((6,6',6''-(2,2',2''-(4,4',4''-(1,3,5-triazine-2,4,6-triyl)tris(azanediyl))tris(benzoyl))tris(hydrazine-2,1-diyl))tris(4-chloro-1,3,5-triazine-6,2-diyl))tris(azanediyl))tris(*N*-hydroxyacetamide) **14d**.

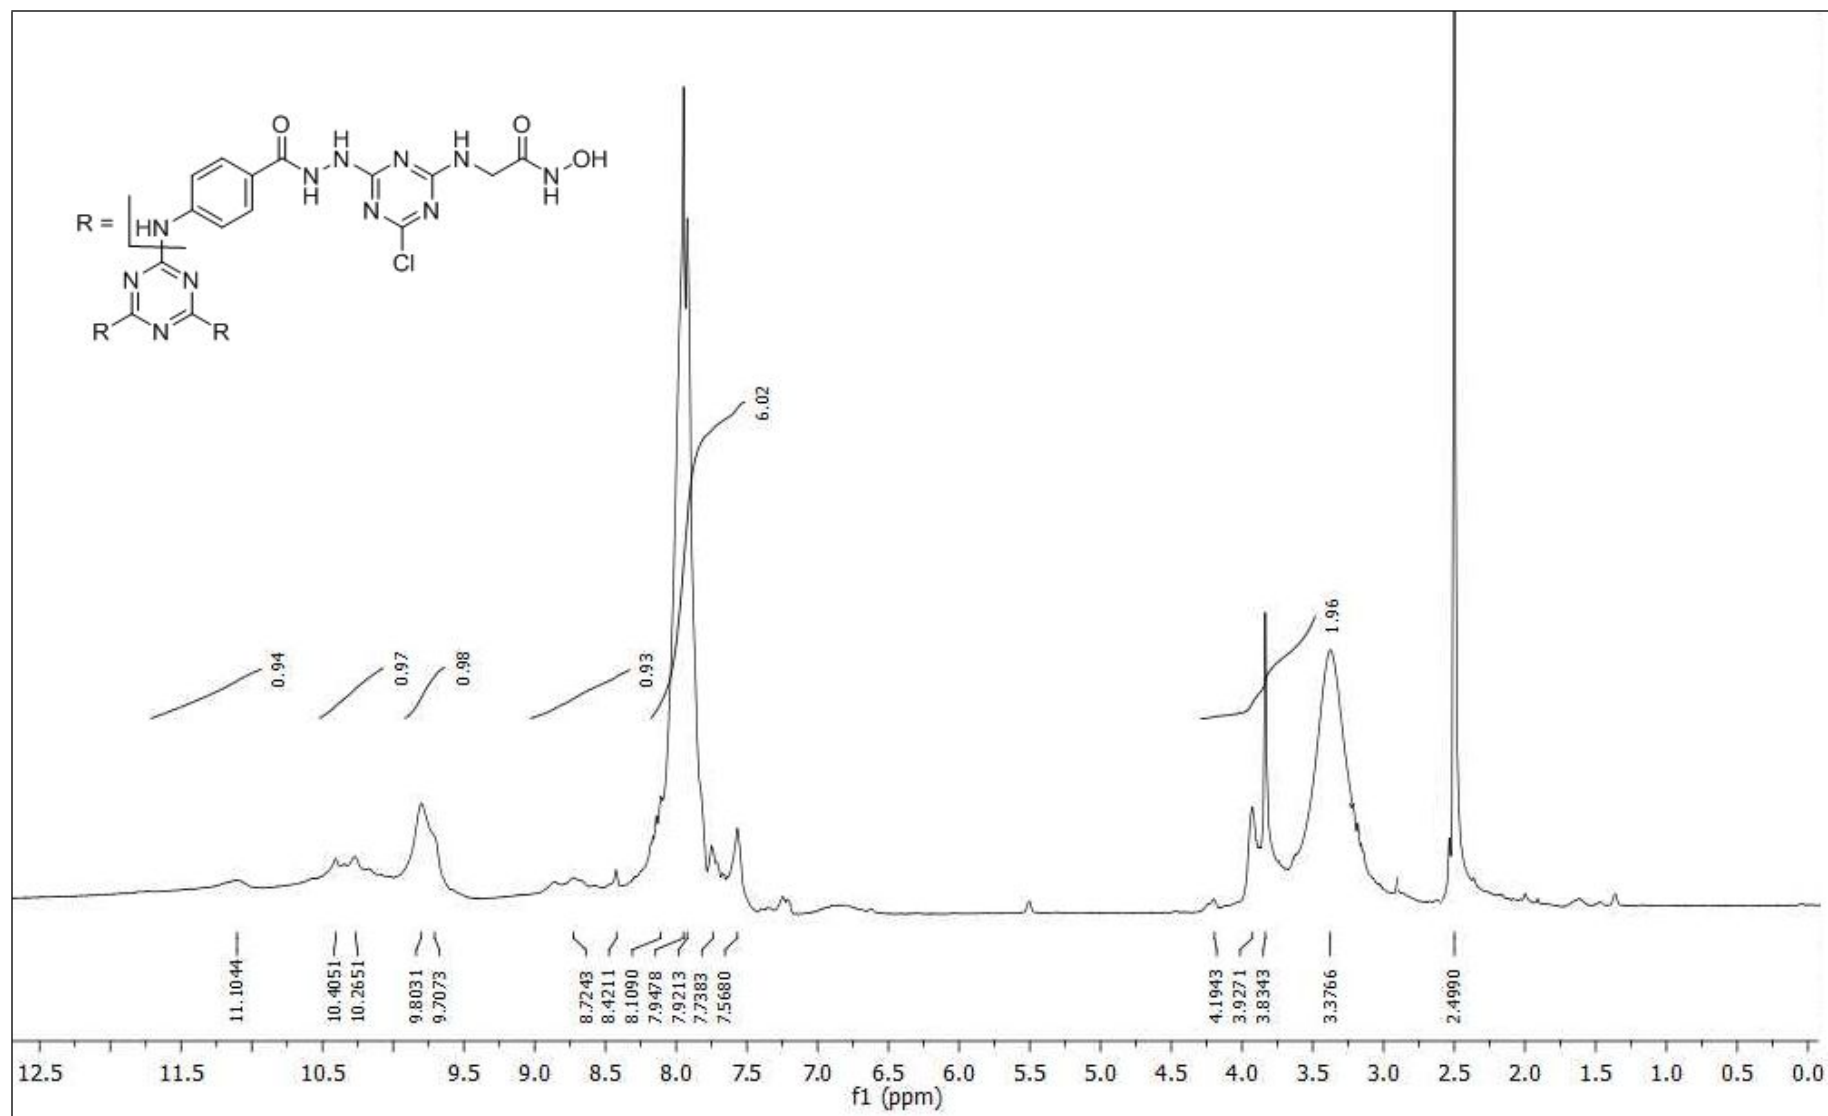

**Figure S37:**  $^1\text{H-NMR}$  ( $\text{DMSO-}d_6$ ) spectrum of 2,2',2''-((6,6',6''-(2,2',2''-(4,4',4''-((1,3,5-triazine-2,4,6-triyl)tris(azanediyl))tris(benzoyl))tris(hydrazine-2,1-diyl))tris(4-chloro-1,3,5-triazine-6,2-diyl))tris(azanediyl))tris(*N*-hydroxyacetamide) **14d**.

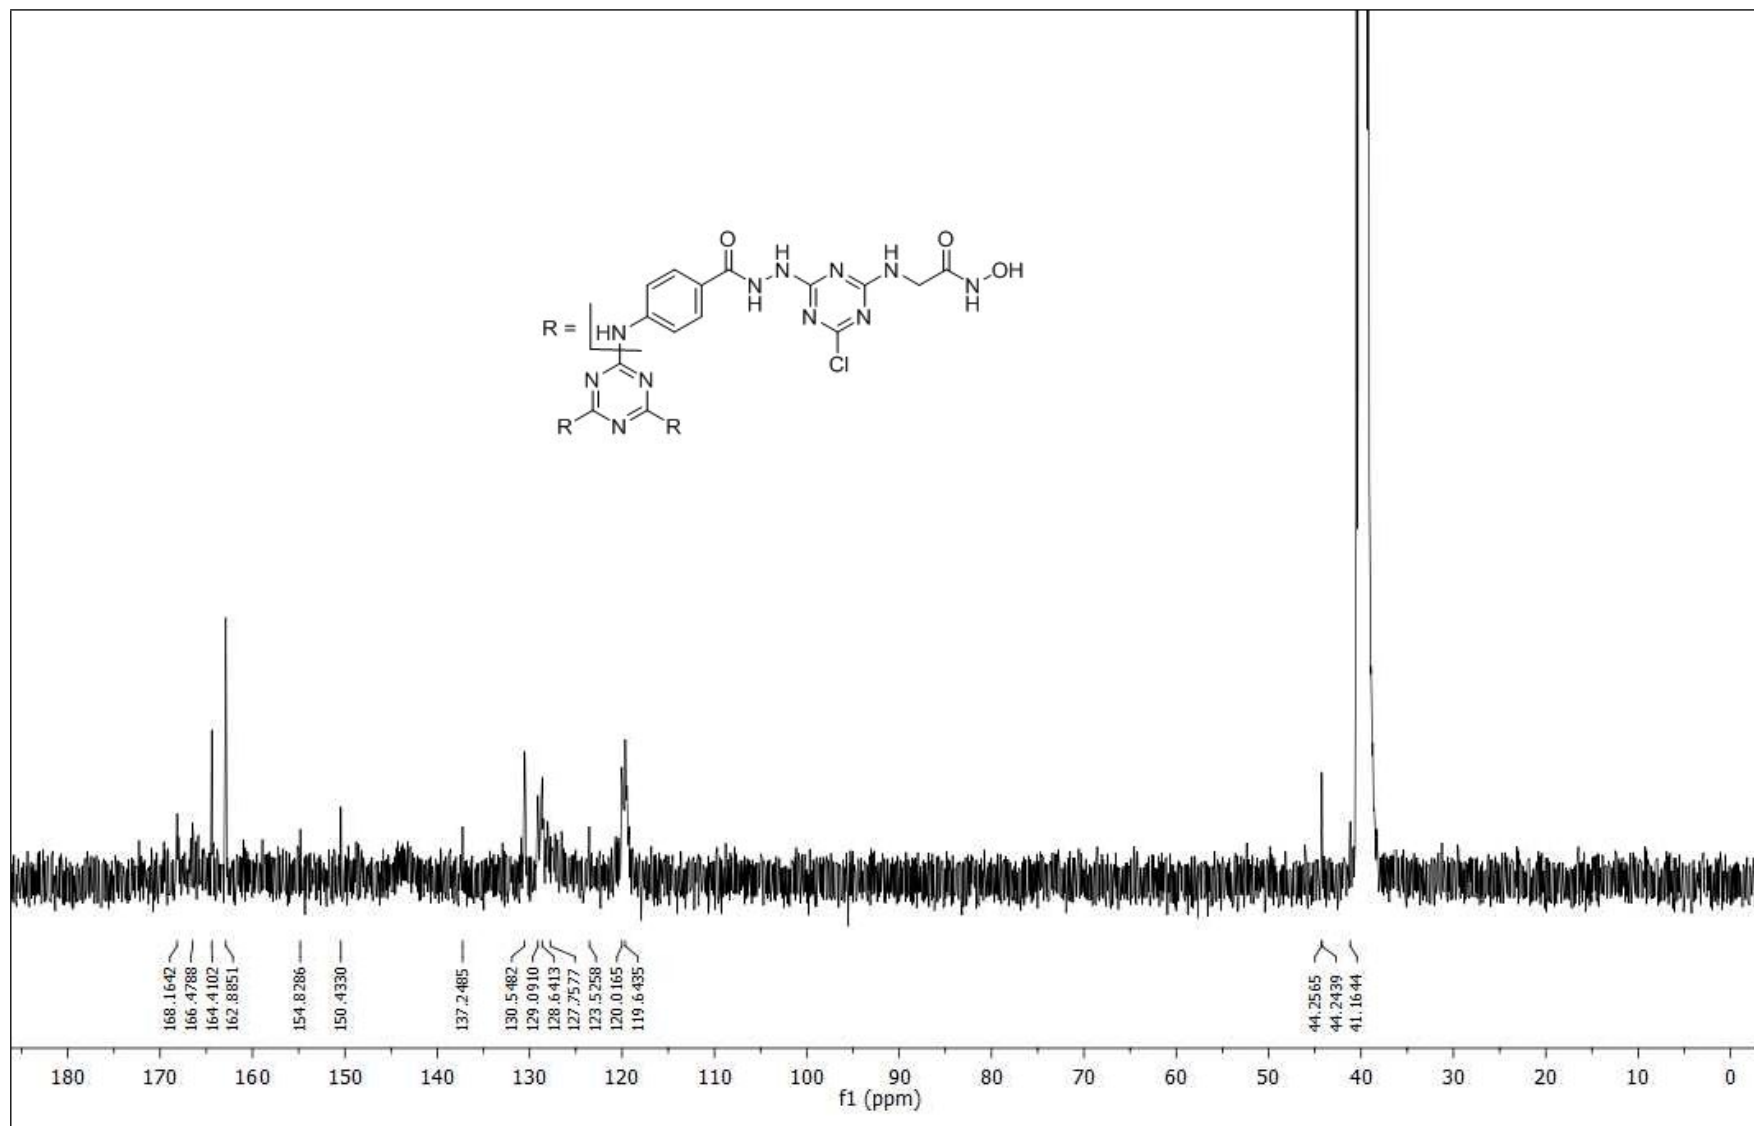

**Figure S38:**  $^{13}\text{C-NMR}$  (DMSO- $d_6$ ) spectrum of 2,2',2''-((6,6',6''-(2,2',2''-(4,4',4''-((1,3,5-triazine-2,4,6-triyl)tris(azanediyl))tris(benzoyl))tris(hydrazine-2,1-diyl))tris(4-chloro-1,3,5-triazine-6,2-diyl))tris(azanediyl))tris(*N*-hydroxyacetamide) **14d**.



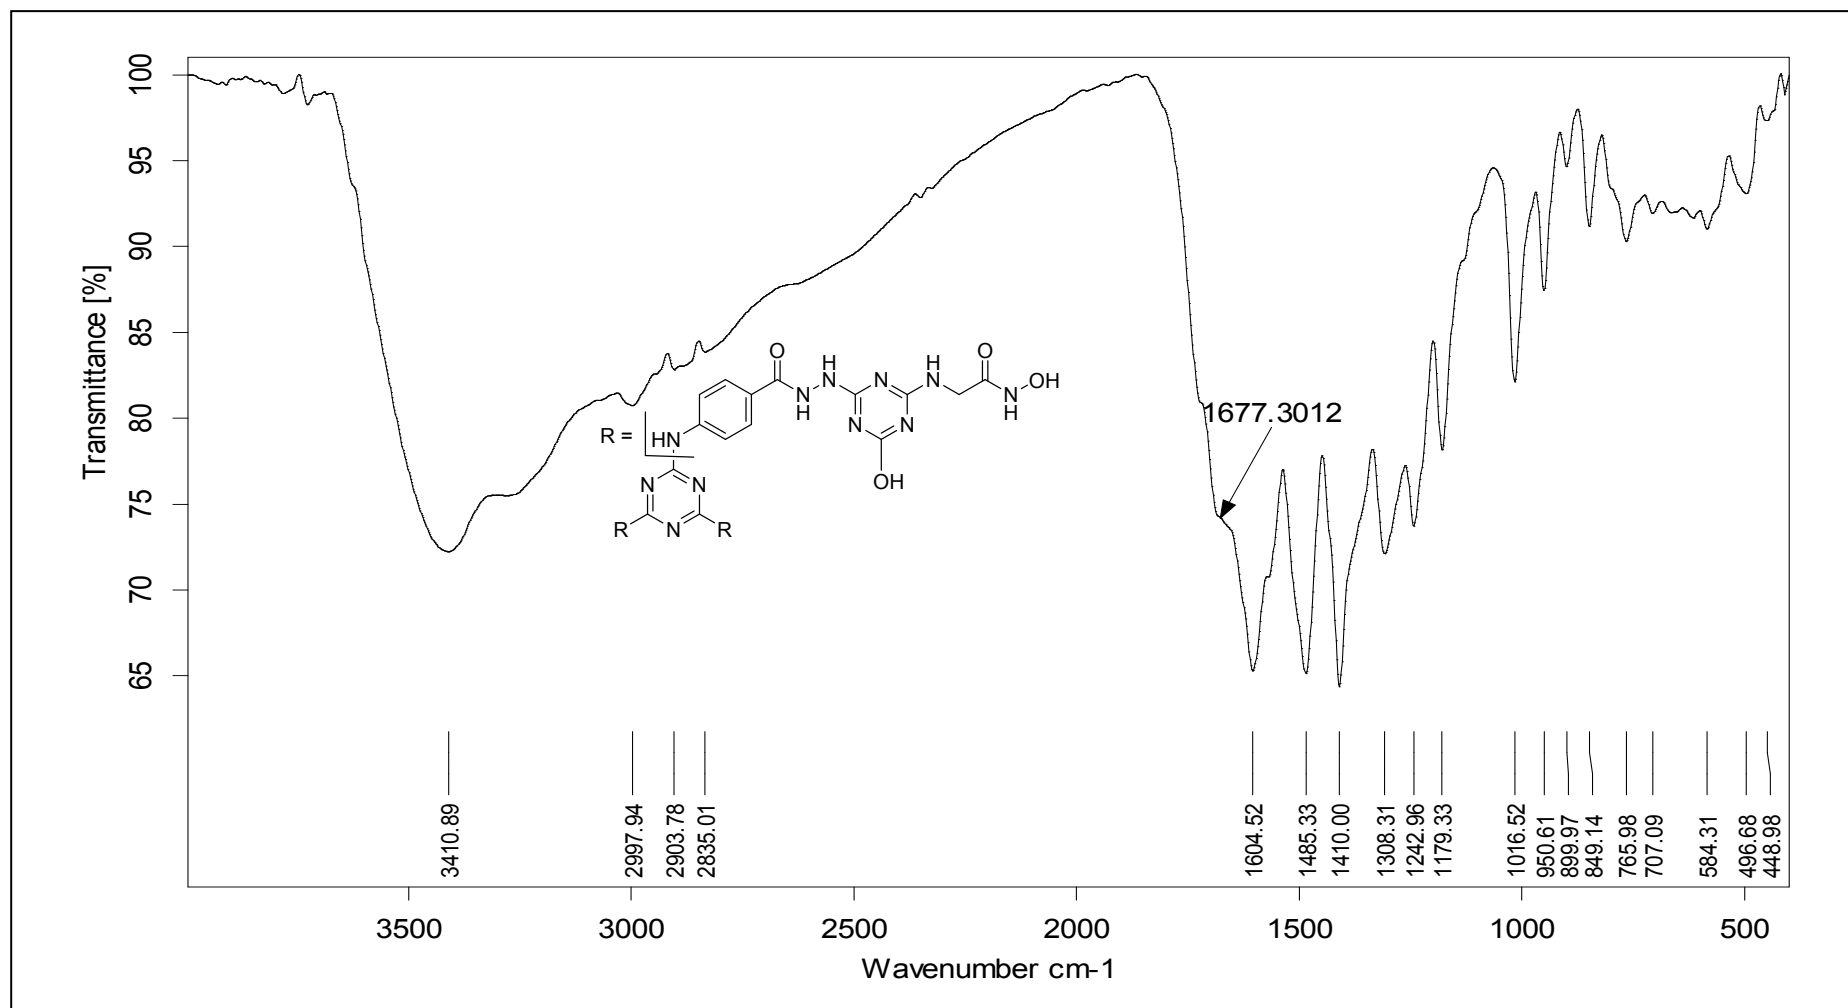

**Figure S39:** IR (KBr) spectrum of 2,2',2''-(((6,6',6''-(2,2',2''-(4,4',4''-((1,3,5-triazine-2,4,6-triyl)tris(azanediyl))tris(benzoyl))tris(hydrazine-2,1-diyl))tris(4-hydroxy-1,3,5-triazine-6,2-diyl))tris(azanediyl))tris(*N*-hydroxyacetamide) **14e**.

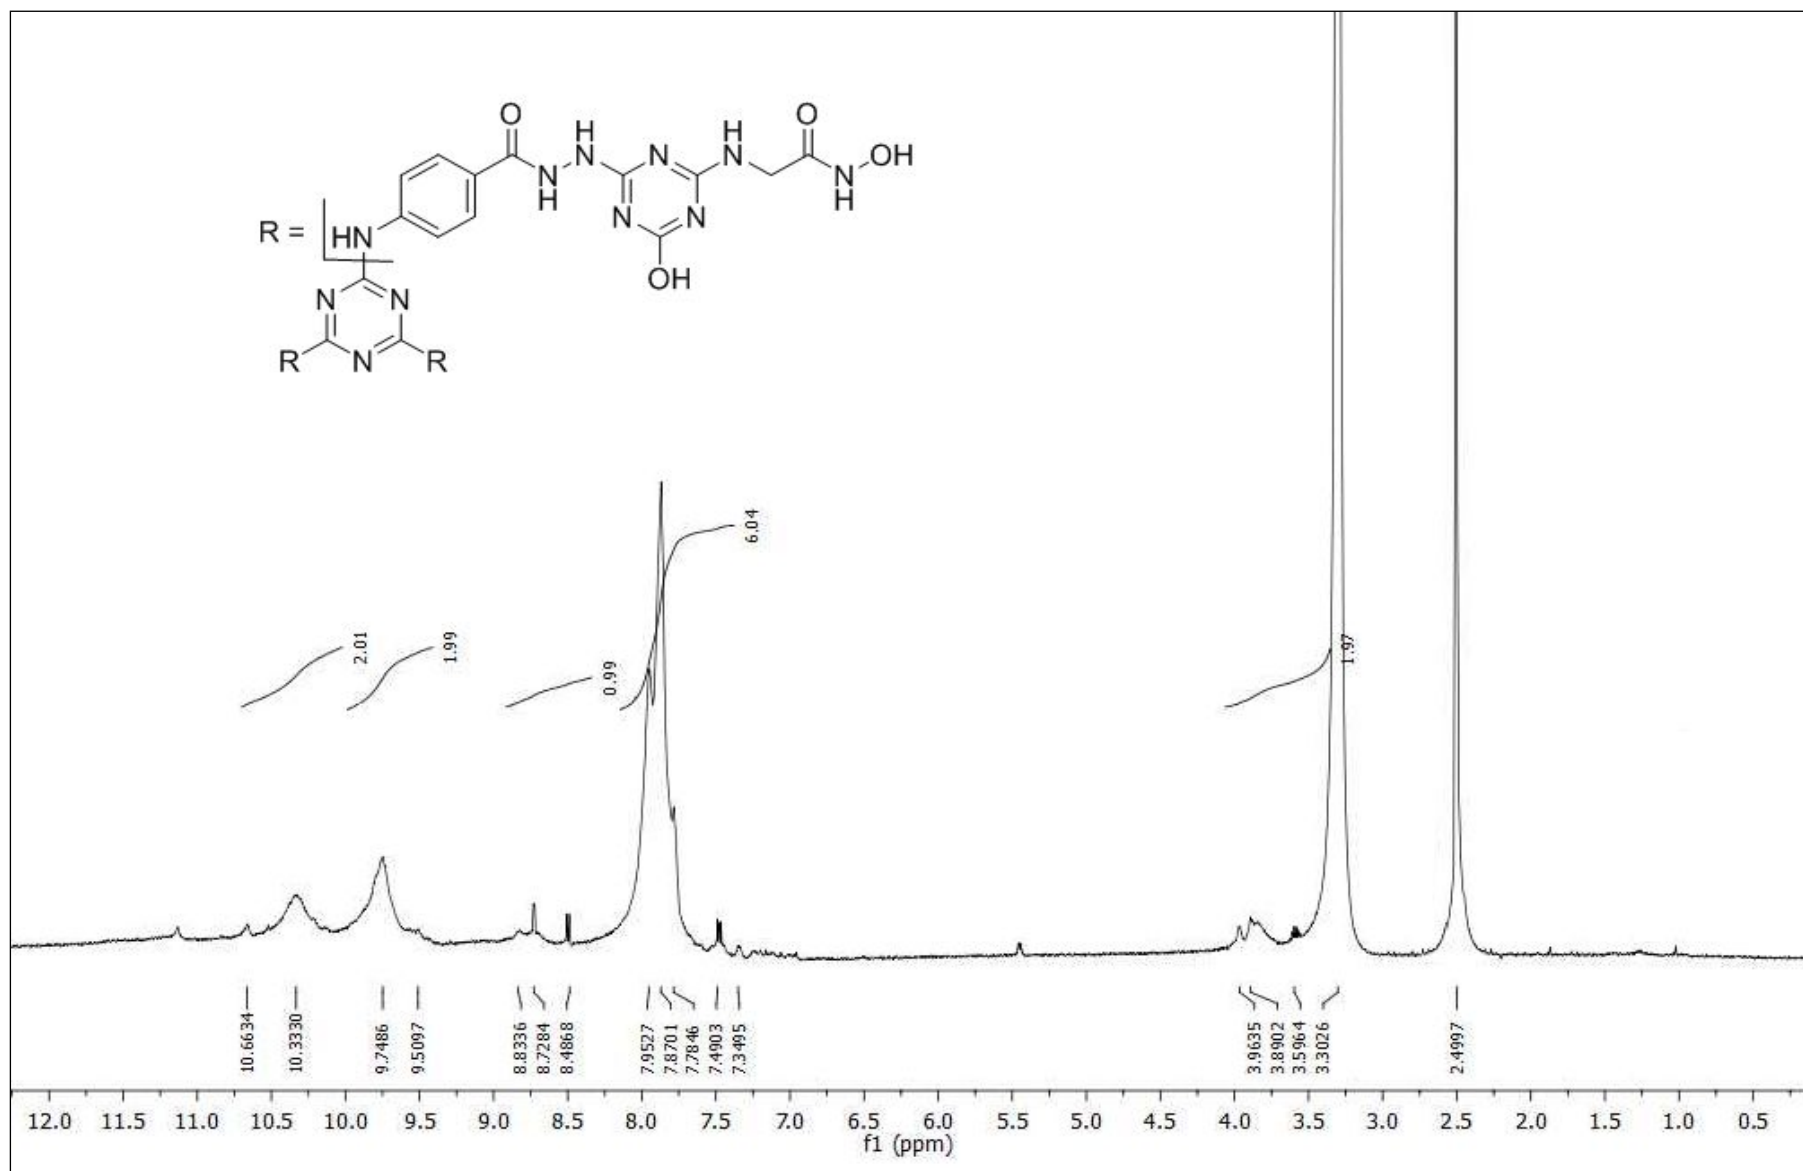

**Figure S40:** <sup>1</sup>H-NMR (DMSO-*d*<sub>6</sub>) spectrum of 2,2',2''-((6,6',6''-(2,2',2''-(4,4',4''-(1,3,5-triazine-2,4,6-triyl)tris(azanediyl))tris(benzoyl))tris(hydrazine-2,1-diyl))tris(4-hydroxy-1,3,5-triazine-6,2-diyl))tris(azanediyl))tris(*N*-hydroxyacetamide) **14e**.

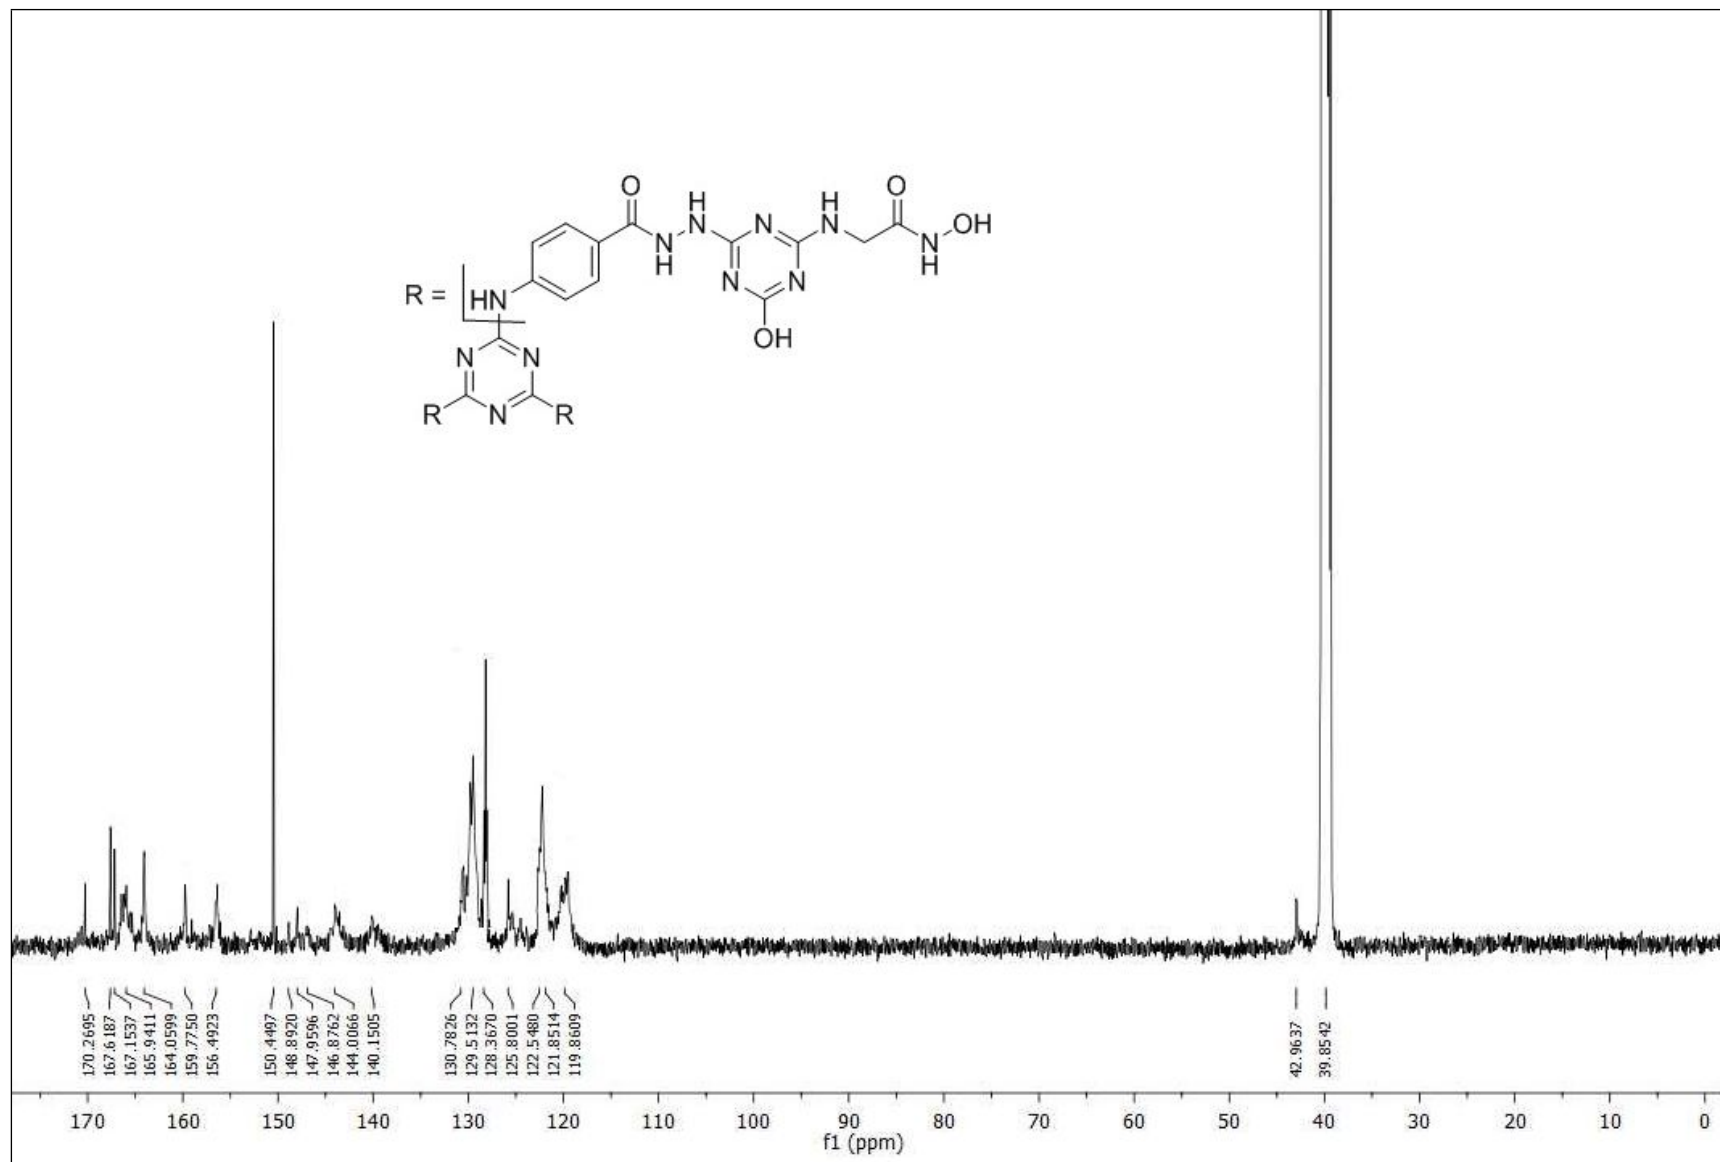

**Figure S41:** <sup>13</sup>C-NMR (DMSO-*d*<sub>6</sub>) spectrum of 2,2',2''-((6,6',6''-(2,2',2''-(4,4',4''-((1,3,5-triazine-2,4,6-triyl)tris(azanediyl))tris(benzoyl))tris(hydrazine-2,1-diyl))tris(4-hydroxy-1,3,5-triazine-6,2-diyl))tris(azanediyl))tris(*N*-hydroxyacetamide) **14e**.

## 2. Biological evaluation

### 2.1. Cytotoxicity of the synthesized dendrimers on normal human lung fibroblasts (Wi-38)

Wi-38 cell line was cultured in DMEM medium-contained 10% fetal bovine serum (FBS), seeded as  $5 \times 10^3$  cells per well in 96-well cell culture plate and incubated at 37°C in 5% CO<sub>2</sub> incubator. After 24 h for cell attachment, serial concentrations of the tested compounds were incubated with Wi-38 cells for 72 h. Cell viability was assayed by MTT method [1]. Twenty microliters of 5 mg/ml MTT (Sigma, USA) was added to each well and the plate was incubated at 37°C for 3 h. Then MTT solution was removed, 100 µl DMSO was added and the absorbance of each well was measured with a microplate reader (BMG LabTech, Germany) at 570 nm. The effective safe concentration (EC<sub>100</sub>) value (at 100% cell viability) of the tested compounds was estimated by the Graphpad Instat software.

### 2.2 Anticancer evaluation of the synthesized dendrimers

Anticancer activities of the synthesized dendrimers were evaluated on two human cancer cell lines namely; triple negative breast cancer cells; MDA-MB 231 and colon cancer cells; Caco-2, in comparison to reference chemotherapy. Triple negative breast cancer cells MDA-MB 231 were cultured in RPMI-1640 (Lonza, USA) supplemented with 10% FBS, while colon cancer cell line (Caco-2) was cultured in DMEM (Lonza, USA) contained with 10% FBS. All cancer cells ( $4 \times 10^3$  cells/well) were seeded in sterile 96-well plates. After 24h, serial concentrations of the tested compounds were incubated with the cancer cell lines for 72 h at 37°C in 5% CO<sub>2</sub> incubator. MTT method was done as described above. The half maximal inhibitory concentration (IC<sub>50</sub>) values were calculated using the Graphpad Instat software. Furthermore, cellular morphological changes before and after treatment with the most effective and safest anticancer compounds were investigated using phase contrast inverted microscope with a digital camera (Olympus, Japan).

### 2.3. In vitro MMPs inhibition of the most active dendrimers

- The assay protocols were performed as directed by the manufacturer
- Inhibition data analyses was carried out as follows:

#### MMP-9 inhibition

| code                                                                               | IC50 | conc.uM | log conc | %inh | T2 | T1 | ΔT | RFU2  | RFU1 | ΔRFU  | slope  | K.Activity | EC  |
|------------------------------------------------------------------------------------|------|---------|----------|------|----|----|----|-------|------|-------|--------|------------|-----|
| <b>8a</b>                                                                          |      | 10      | 4        | 89.7 | 30 | 0  | 30 | 0.145 | 0    | 0.145 | 0.0469 | 12.367     | 120 |
| 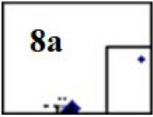 |      | 1       | 3        | 76.4 | 30 | 0  | 30 | 0.332 | 0    | 0.332 | 0.0469 | 28.316     | 120 |
|                                                                                    |      | 0.1     | 2        | 42.7 | 30 | 0  | 30 | 0.806 | 0    | 0.806 | 0.0469 | 68.742     | 120 |
|                                                                                    |      | 0.01    | 1        | 20.7 | 30 | 0  | 30 | 1.116 | 0    | 1.116 | 0.0469 | 95.181     | 120 |
| EC                                                                                 |      |         |          | 0    | 30 | 0  | 30 | 1.407 | 0    | 1.407 | 0.0469 | 120        | 120 |

| code                                                                                           | IC50 | conc.uM | log conc | %inh | T2 | T1 | ΔT | RFU2  | RFU1 | ΔRFU  | slope  | K.Activity | EC  |
|------------------------------------------------------------------------------------------------|------|---------|----------|------|----|----|----|-------|------|-------|--------|------------|-----|
| <b>14a</b><br>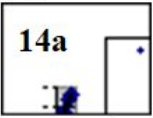 |      | 10      | 4        | 81.4 | 30 | 0  | 30 | 0.261 | 0    | 0.261 | 0.0469 | 22.26      | 120 |
|                                                                                                |      | 1       | 3        | 64.9 | 30 | 0  | 30 | 0.494 | 0    | 0.494 | 0.0469 | 42.132     | 120 |
|                                                                                                |      | 0.1     | 2        | 31.8 | 30 | 0  | 30 | 0.959 | 0    | 0.959 | 0.0469 | 81.791     | 120 |
|                                                                                                |      | 0.01    | 1        | 15.1 | 30 | 0  | 30 | 1.194 | 0    | 1.194 | 0.0469 | 101.83     | 120 |
| EC                                                                                             |      |         |          | 0    | 30 | 0  | 30 | 1.407 | 0    | 1.407 | 0.0469 | 120        | 120 |

| code                                                                                           | IC50 | conc.uM | log conc | %inh | T2 | T1 | ΔT | RFU2  | RFU1 | ΔRFU  | slope  | K.Activity | EC  |
|------------------------------------------------------------------------------------------------|------|---------|----------|------|----|----|----|-------|------|-------|--------|------------|-----|
| <b>14b</b><br>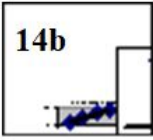 |      | 10      | 4        | 88.3 | 30 | 0  | 30 | 0.165 | 0    | 0.165 | 0.0469 | 14.072     | 120 |
|                                                                                                |      | 1       | 3        | 71.2 | 30 | 0  | 30 | 0.405 | 0    | 0.405 | 0.0469 | 34.542     | 120 |
|                                                                                                |      | 0.1     | 2        | 42.4 | 30 | 0  | 30 | 0.811 | 0    | 0.811 | 0.0469 | 69.168     | 120 |
|                                                                                                |      | 0.01    | 1        | 16.1 | 30 | 0  | 30 | 1.181 | 0    | 1.181 | 0.0469 | 100.72     | 120 |
| EC                                                                                             |      |         |          | 0    | 30 | 0  | 30 | 1.407 | 0    | 1.407 | 0.0469 | 120        | 120 |

| code                                                                                             | IC50 | conc.ug/ml | log conc | %inh | T2 | T1 | ΔT | RFU2  | RFU1 | ΔRFU  | slope  | K.Activity | EC  |
|--------------------------------------------------------------------------------------------------|------|------------|----------|------|----|----|----|-------|------|-------|--------|------------|-----|
| <b>14d</b><br> |      | 10         | 4        | 87.7 | 30 | 0  | 30 | 0.173 | 0    | 0.173 | 0.0469 | 14.755     | 120 |
|                                                                                                  |      | 1          | 3        | 70.3 | 30 | 0  | 30 | 0.418 | 0    | 0.418 | 0.0469 | 35.65      | 120 |
|                                                                                                  |      | 0.1        | 2        | 34.1 | 30 | 0  | 30 | 0.927 | 0    | 0.927 | 0.0469 | 79.062     | 120 |
|                                                                                                  |      | 0.01       | 1        | 18.9 | 30 | 0  | 30 | 1.141 | 0    | 1.141 | 0.0469 | 97.313     | 120 |
| EC                                                                                               |      |            |          | 0    | 30 | 0  | 30 | 1.407 | 0    | 1.407 | 0.0469 | 120        | 120 |

| code                                                                                       | IC50 | conc.uM | log conc | %inh     | T2 | T1 | ΔT | RFU2  | RFU1 | ΔRFU  | slope    | K.Activity | EC  |
|--------------------------------------------------------------------------------------------|------|---------|----------|----------|----|----|----|-------|------|-------|----------|------------|-----|
| NNGH<br>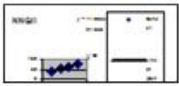 |      | 10      | 4        | 75.37526 | 30 | 0  | 30 | 0.115 | 0    | 0.115 | 0.015567 | 29.54969   | 120 |
|                                                                                            |      | 1       | 3        | 63.81234 | 30 | 0  | 30 | 0.169 | 0    | 0.169 | 0.015567 | 43.42519   | 120 |
|                                                                                            |      | 0.1     | 2        | 50.53639 | 30 | 0  | 30 | 0.231 | 0    | 0.231 | 0.015567 | 59.35633   | 120 |
|                                                                                            |      | 0.01    | 1        | 40.25824 | 30 | 0  | 30 | 0.279 | 0    | 0.279 | 0.015567 | 71.69011   | 120 |
| EC                                                                                         |      |         |          | 0        | 30 | 0  | 30 | 0.467 | 0    | 0.467 | 0.015567 | 120        | 120 |

**MMP-2 inhibition**

| code      | IC <sub>50</sub> | conc.ng/ml | log conc | %inh | T2 | T1 | ΔT | RFU2  | RFU1 | ΔRFU  | slope   | K.Activity | EC  |
|-----------|------------------|------------|----------|------|----|----|----|-------|------|-------|---------|------------|-----|
| <b>8a</b> |                  | 10         | 1        | 76   | 30 | 0  | 30 | 24.31 | 0    | 24.31 | 3.33333 | 29.17      | 120 |
|           |                  | 1          | 0        | 56   | 30 | 0  | 30 | 43.86 | 0    | 43.86 | 3.33333 | 52.63      | 120 |
|           |                  | 0.1        | -1       | 30   | 30 | 0  | 30 | 69.75 | 0    | 69.75 | 3.33333 | 83.7       | 120 |
|           |                  | 0.01       | -2       | 12   | 30 | 0  | 30 | 88.12 | 0    | 88.12 | 3.33333 | 105.7      | 120 |
| EC        |                  |            |          | 0    | 30 | 0  | 30 | 100   | 0    | 100   | 3.33333 | 120        | 120 |

| code       | IC <sub>50</sub> | conc.ng/ml | log conc | %inh | T2 | T1 | ΔT | RFU2  | RFU1 | ΔRFU  | slope   | K.Activity | EC  |
|------------|------------------|------------|----------|------|----|----|----|-------|------|-------|---------|------------|-----|
| <b>14a</b> |                  | 10         | 1        | 74   | 30 | 0  | 30 | 25.99 | 0    | 25.99 | 3.33333 | 31.19      | 120 |
|            |                  | 1          | 0        | 57   | 30 | 0  | 30 | 42.64 | 0    | 42.64 | 3.33333 | 51.17      | 120 |
|            |                  | 0.1        | -1       | 27   | 30 | 0  | 30 | 72.57 | 0    | 72.57 | 3.33333 | 87.08      | 120 |
|            |                  | 0.01       | -2       | 8.3  | 30 | 0  | 30 | 91.74 | 0    | 91.74 | 3.33333 | 110.1      | 120 |
| EC         |                  |            |          | 0    | 30 | 0  | 30 | 100   | 0    | 100   | 3.33333 | 120        | 120 |

| code       | IC <sub>50</sub> | conc.ng/ml | log conc | %inh | T2 | T1 | ΔT | RFU2  | RFU1 | ΔRFU  | slope   | K.Activity | EC  |
|------------|------------------|------------|----------|------|----|----|----|-------|------|-------|---------|------------|-----|
| <b>14b</b> |                  | 10         | 1        | 86   | 30 | 0  | 30 | 13.62 | 0    | 13.62 | 3.33333 | 16.34      | 120 |
|            |                  | 1          | 0        | 70   | 30 | 0  | 30 | 29.81 | 0    | 29.81 | 3.33333 | 35.77      | 120 |
|            |                  | 0.1        | -1       | 48   | 30 | 0  | 30 | 52.41 | 0    | 52.41 | 3.33333 | 62.89      | 120 |
|            |                  | 0.01       | -2       | 33   | 30 | 0  | 30 | 66.93 | 0    | 66.93 | 3.33333 | 80.32      | 120 |
| EC         |                  |            |          | 0    | 30 | 0  | 30 | 100   | 0    | 100   | 3.33333 | 120        | 120 |

| code       | IC <sub>50</sub> | conc.ng/ml | log conc | %inh | T2 | T1 | ΔT | RFU2  | RFU1 | ΔRFU  | slope   | K.Activity | EC  |
|------------|------------------|------------|----------|------|----|----|----|-------|------|-------|---------|------------|-----|
| <b>14d</b> |                  | 10         | 1        | 82   | 30 | 0  | 30 | 17.52 | 0    | 17.52 | 3.33333 | 21.02      | 120 |
|            |                  | 1          | 0        | 54   | 30 | 0  | 30 | 46.32 | 0    | 46.32 | 3.33333 | 55.58      | 120 |
|            |                  | 0.1        | -1       | 28   | 30 | 0  | 30 | 72.42 | 0    | 72.42 | 3.33333 | 86.9       | 120 |
|            |                  | 0.01       | -2       | 15   | 30 | 0  | 30 | 85.07 | 0    | 85.07 | 3.33333 | 102.1      | 120 |
| EC         |                  |            |          | 0    | 30 | 0  | 30 | 100   | 0    | 100   | 3.33333 | 120        | 120 |

| code        | IC <sub>50</sub> | conc.ng/ml | log conc | %inh | T2 | T1 | ΔT | RFU2  | RFU1 | ΔRFU  | slope   | K.Activity | EC  |
|-------------|------------------|------------|----------|------|----|----|----|-------|------|-------|---------|------------|-----|
| <b>NNGH</b> |                  | 10         | 1        | 89   | 30 | 0  | 30 | 11.41 | 0    | 11.41 | 3.33333 | 13.69      | 120 |
|             |                  | 1          | 0        | 72   | 30 | 0  | 30 | 28.45 | 0    | 28.45 | 3.33333 | 34.14      | 120 |
|             |                  | 0.1        | -1       | 49   | 30 | 0  | 30 | 51.16 | 0    | 51.16 | 3.33333 | 61.39      | 120 |
|             |                  | 0.01       | -2       | 35   | 30 | 0  | 30 | 64.58 | 0    | 64.58 | 3.33333 | 77.5       | 120 |
| EC          |                  |            |          | 0    | 30 | 0  | 30 | 100   | 0    | 100   | 3.33333 | 120        | 120 |

### MMP-7 inhibition

| code      | IC <sub>50</sub> | conc | log | %inh | T2 | T1 | ΔT | RFU2  | RFU1 | ΔRFU  | slope | K.Activity |
|-----------|------------------|------|-----|------|----|----|----|-------|------|-------|-------|------------|
| <b>8a</b> |                  | 10   | 1   | 81   | 30 | 0  | 30 | 19.14 | 0    | 19.14 | 3.333 | 22.96802   |
|           |                  | 1    | 0   | 66   | 30 | 0  | 30 | 33.89 | 0    | 33.89 | 3.333 | 40.66804   |
|           |                  | 0.1  | -1  | 44   | 30 | 0  | 30 | 56.27 | 0    | 56.27 | 3.333 | 67.52407   |
|           |                  | 0.01 | -2  | 25   | 30 | 0  | 30 | 75.43 | 0    | 75.43 | 3.333 | 90.51609   |
| EC        |                  |      |     | 0    | 30 | 0  | 30 | 100   | 0    | 100   | 3.333 | 120        |

| code | IC50 | conc.uM | log conc | %inh     | T2 | T1 | ΔT | RFU2   | RFU1 | ΔRFU   | slope  | K.Activity | EC  |
|------|------|---------|----------|----------|----|----|----|--------|------|--------|--------|------------|-----|
| NNGH |      | 10      | 4        | 89.73602 | 30 | 0  | 30 | 17843  | 0    | 17843  | 5794.7 | 12.31677   | 120 |
|      |      | 1       | 3        | 76.23921 | 30 | 0  | 30 | 41306  | 0    | 41306  | 5794.7 | 28.51295   | 120 |
|      |      | 0.1     | 2        | 40.40991 | 30 | 0  | 30 | 103592 | 0    | 103592 | 5794.7 | 71.5081    | 120 |
|      |      | 0.01    | 1        | 7.055873 | 30 | 0  | 30 | 161575 | 0    | 161575 | 5794.7 | 111.533    | 120 |
| EC   |      |         |          | 0        | 30 | 0  | 30 | 173841 | 0    | 173841 | 5794.7 | 120        | 120 |

### MMP-10 inhibition

| code      | IC <sub>50</sub> | conc.ng/ml | log conc | %inh | T2 | T1 | ΔT | RFU2  | RFU1 | ΔRFU  | slope | K.Activity |
|-----------|------------------|------------|----------|------|----|----|----|-------|------|-------|-------|------------|
| <b>8a</b> |                  | 10         | 1        | 85   | 30 | 0  | 30 | 14.61 | 0    | 14.61 | 3.333 | 17.53202   |
|           |                  | 1          | 0        | 64   | 30 | 0  | 30 | 35.55 | 0    | 35.55 | 3.333 | 42.66004   |
|           |                  | 0.1        | -1       | 47   | 30 | 0  | 30 | 52.58 | 0    | 52.58 | 3.333 | 63.09606   |
|           |                  | 0.01       | -2       | 28   | 30 | 0  | 30 | 71.79 | 0    | 71.79 | 3.333 | 86.14809   |
| EC        |                  |            |          | 0    | 30 | 0  | 30 | 100   | 0    | 100   | 3.333 | 120        |

| code | IC50 | conc.uM | log conc | %inh     | T2 | T1 | ΔT | RFU2   | RFU1 | ΔRFU   | slope    | K.Activity | EC  |
|------|------|---------|----------|----------|----|----|----|--------|------|--------|----------|------------|-----|
| NNGH |      | 10      | 4        | 92.93016 | 30 | 0  | 30 | 11059  | 0    | 11059  | 5214.167 | 8.48381    | 120 |
|      |      | 1       | 3        | 82.3596  | 30 | 0  | 30 | 27594  | 0    | 27594  | 5214.167 | 21.16848   | 120 |
|      |      | 0.1     | 2        | 46.52901 | 30 | 0  | 30 | 83642  | 0    | 83642  | 5214.167 | 64.16519   | 120 |
|      |      | 0.01    | 1        | 25.27346 | 30 | 0  | 30 | 116891 | 0    | 116891 | 5214.167 | 89.67185   | 120 |
| EC   |      |         |          | 0        | 30 | 0  | 30 | 156425 | 0    | 156425 | 5214.167 | 120        | 120 |

### MMP-13 inhibition

| code      | IC50 | conc.ng/ml | log conc | %inh | T2 | T1 | ΔT | RFU2  | RFU1 | ΔRFU  | slope | K.Activity |
|-----------|------|------------|----------|------|----|----|----|-------|------|-------|-------|------------|
| <b>8a</b> |      | 10         | 1        | 89   | 30 | 0  | 30 | 11.21 | 0    | 11.21 | 3.333 | 13.45201   |
|           |      | 1          | 0        | 74   | 30 | 0  | 30 | 25.91 | 0    | 25.91 | 3.333 | 31.09203   |
|           |      | 0.1        | -1       | 46   | 30 | 0  | 30 | 53.83 | 0    | 53.83 | 3.333 | 64.59606   |
|           |      | 0.01       | -2       | 26   | 30 | 0  | 30 | 74.01 | 0    | 74.01 | 3.333 | 88.81209   |
| EC        |      |            |          | 0    | 30 | 0  | 30 | 100   | 0    | 100   | 3.333 | 120        |

| code | IC50 | conc. $\mu$ M | log conc | %inh     | T2 | T1 | $\Delta$ T | RFU2   | RFU1 | $\Delta$ RFU | slope    | K Activity | EC  |
|------|------|---------------|----------|----------|----|----|------------|--------|------|--------------|----------|------------|-----|
| NNGH |      | 10            | 4        | 87.3909  | 30 | 0  | 30         | 17597  | 0    | 17597        | 4651.933 | 15.13091   | 120 |
|      |      | 1             | 3        | 65.43444 | 30 | 0  | 30         | 48239  | 0    | 48239        | 4651.933 | 41.47867   | 120 |
|      |      | 0.1           | 2        | 31.01864 | 30 | 0  | 30         | 96269  | 0    | 96269        | 4651.933 | 82.77763   | 120 |
|      |      | 0.01          | 1        | 10.09114 | 30 | 0  | 30         | 125475 | 0    | 125475       | 4651.933 | 107.8906   | 120 |
| EC   |      |               |          | 0        | 30 | 0  | 30         | 139558 | 0    | 139558       | 4651.933 | 120        | 120 |

#### 2.4. Flow cytometric analysis of apoptotic effects of the most active and safe compounds

Dendrimers were incubated, for 72 h, with MDA-MB231 and Caco-2. After trypsinization, the untreated and treated cells were incubated with annexin V/PI for 15 min. Then cells were fixed and incubated with streptavidin-fluorescein (5  $\mu$ g/mL) for 15 min. The apoptosis-dependent anticancer effect was determined by quantification of annexin-stained apoptotic cells using the FITC signal detector (FL1) against the phycoerythrin emission signal detector (FL2).

#### 2.5. Tumor cell migration inhibition

Caco2 cells were used for the wound healing migration assay. After cell seeding in 6-well plate and reaching > 90% confluence, a yellow tip was used for scratching. Then cells were washed and treated with the selected compounds. The wound area was photographed and calculated by image j software for estimating the inhibition migration percentages in the treated wells relative to untreated wells.

#### 2.6. Expression of VEGF, cyclin D and p21

Total RNAs of untreated and three most effective anticancer compounds-treated MDA-MB-231 and Caco-2 cells were extracted using Gene JET RNA Purification Kit (Thermo Scientific, USA). The cDNA was synthesized from mRNA using cDNA Synthesis Kit (Thermo Scientific, USA). Real time PCR was performed using SYBR green master mix and specific primers (Forward/Reverse) were 5'-TACTCTGGCGCAGAAATTAGGTC-3'/5'-CTGTCTCGGAGCTCGTCTATTTG-3', 5'-CCACAGCGATATCCAGACATTC-3'/5'-GAAGTCAAAGTTCCACCGTTCTC-3' and 5'-GAGGGCAGAATCATCACGAAG-3'/5'-CACACAGGATGGCTTGAAGA-3' for cyclin D, p21 and VEGF genes, respectively. The  $2^{-\Delta\Delta CT}$  equation was used to estimate the change in gene expressions in the treated cancer cells relative to untreated cancer cells.

#### 2.7. Statistical analysis

The data are expressed as mean  $\pm$  standard error of mean (SEM) and the significant values were considered at  $p < 0.05$ . One-way analysis of variance (ANOVA) by Tukey's test used for evaluating the difference between the mean values of the studied treatments. The analysis was done for three measurements using SPSS software version 16.

#### References:

[1] T. Mosmann, J. Immunol. Methods 65 (1-2) (1983) 55-63.
